# Supplementary material for: Vertical stress and stability of interburden over an abandoned pillar working before upward mining: a case study
Source: R Soc Open Sci. 2018 Aug 8;5(8):180346. doi: 10.1098/rsos.180346 (PMC6124054; doi:10.1098/rsos.180346)
Supplement: Jinwen Bai_Figures_ESM.doc [file rsos180346supp1.doc]

| 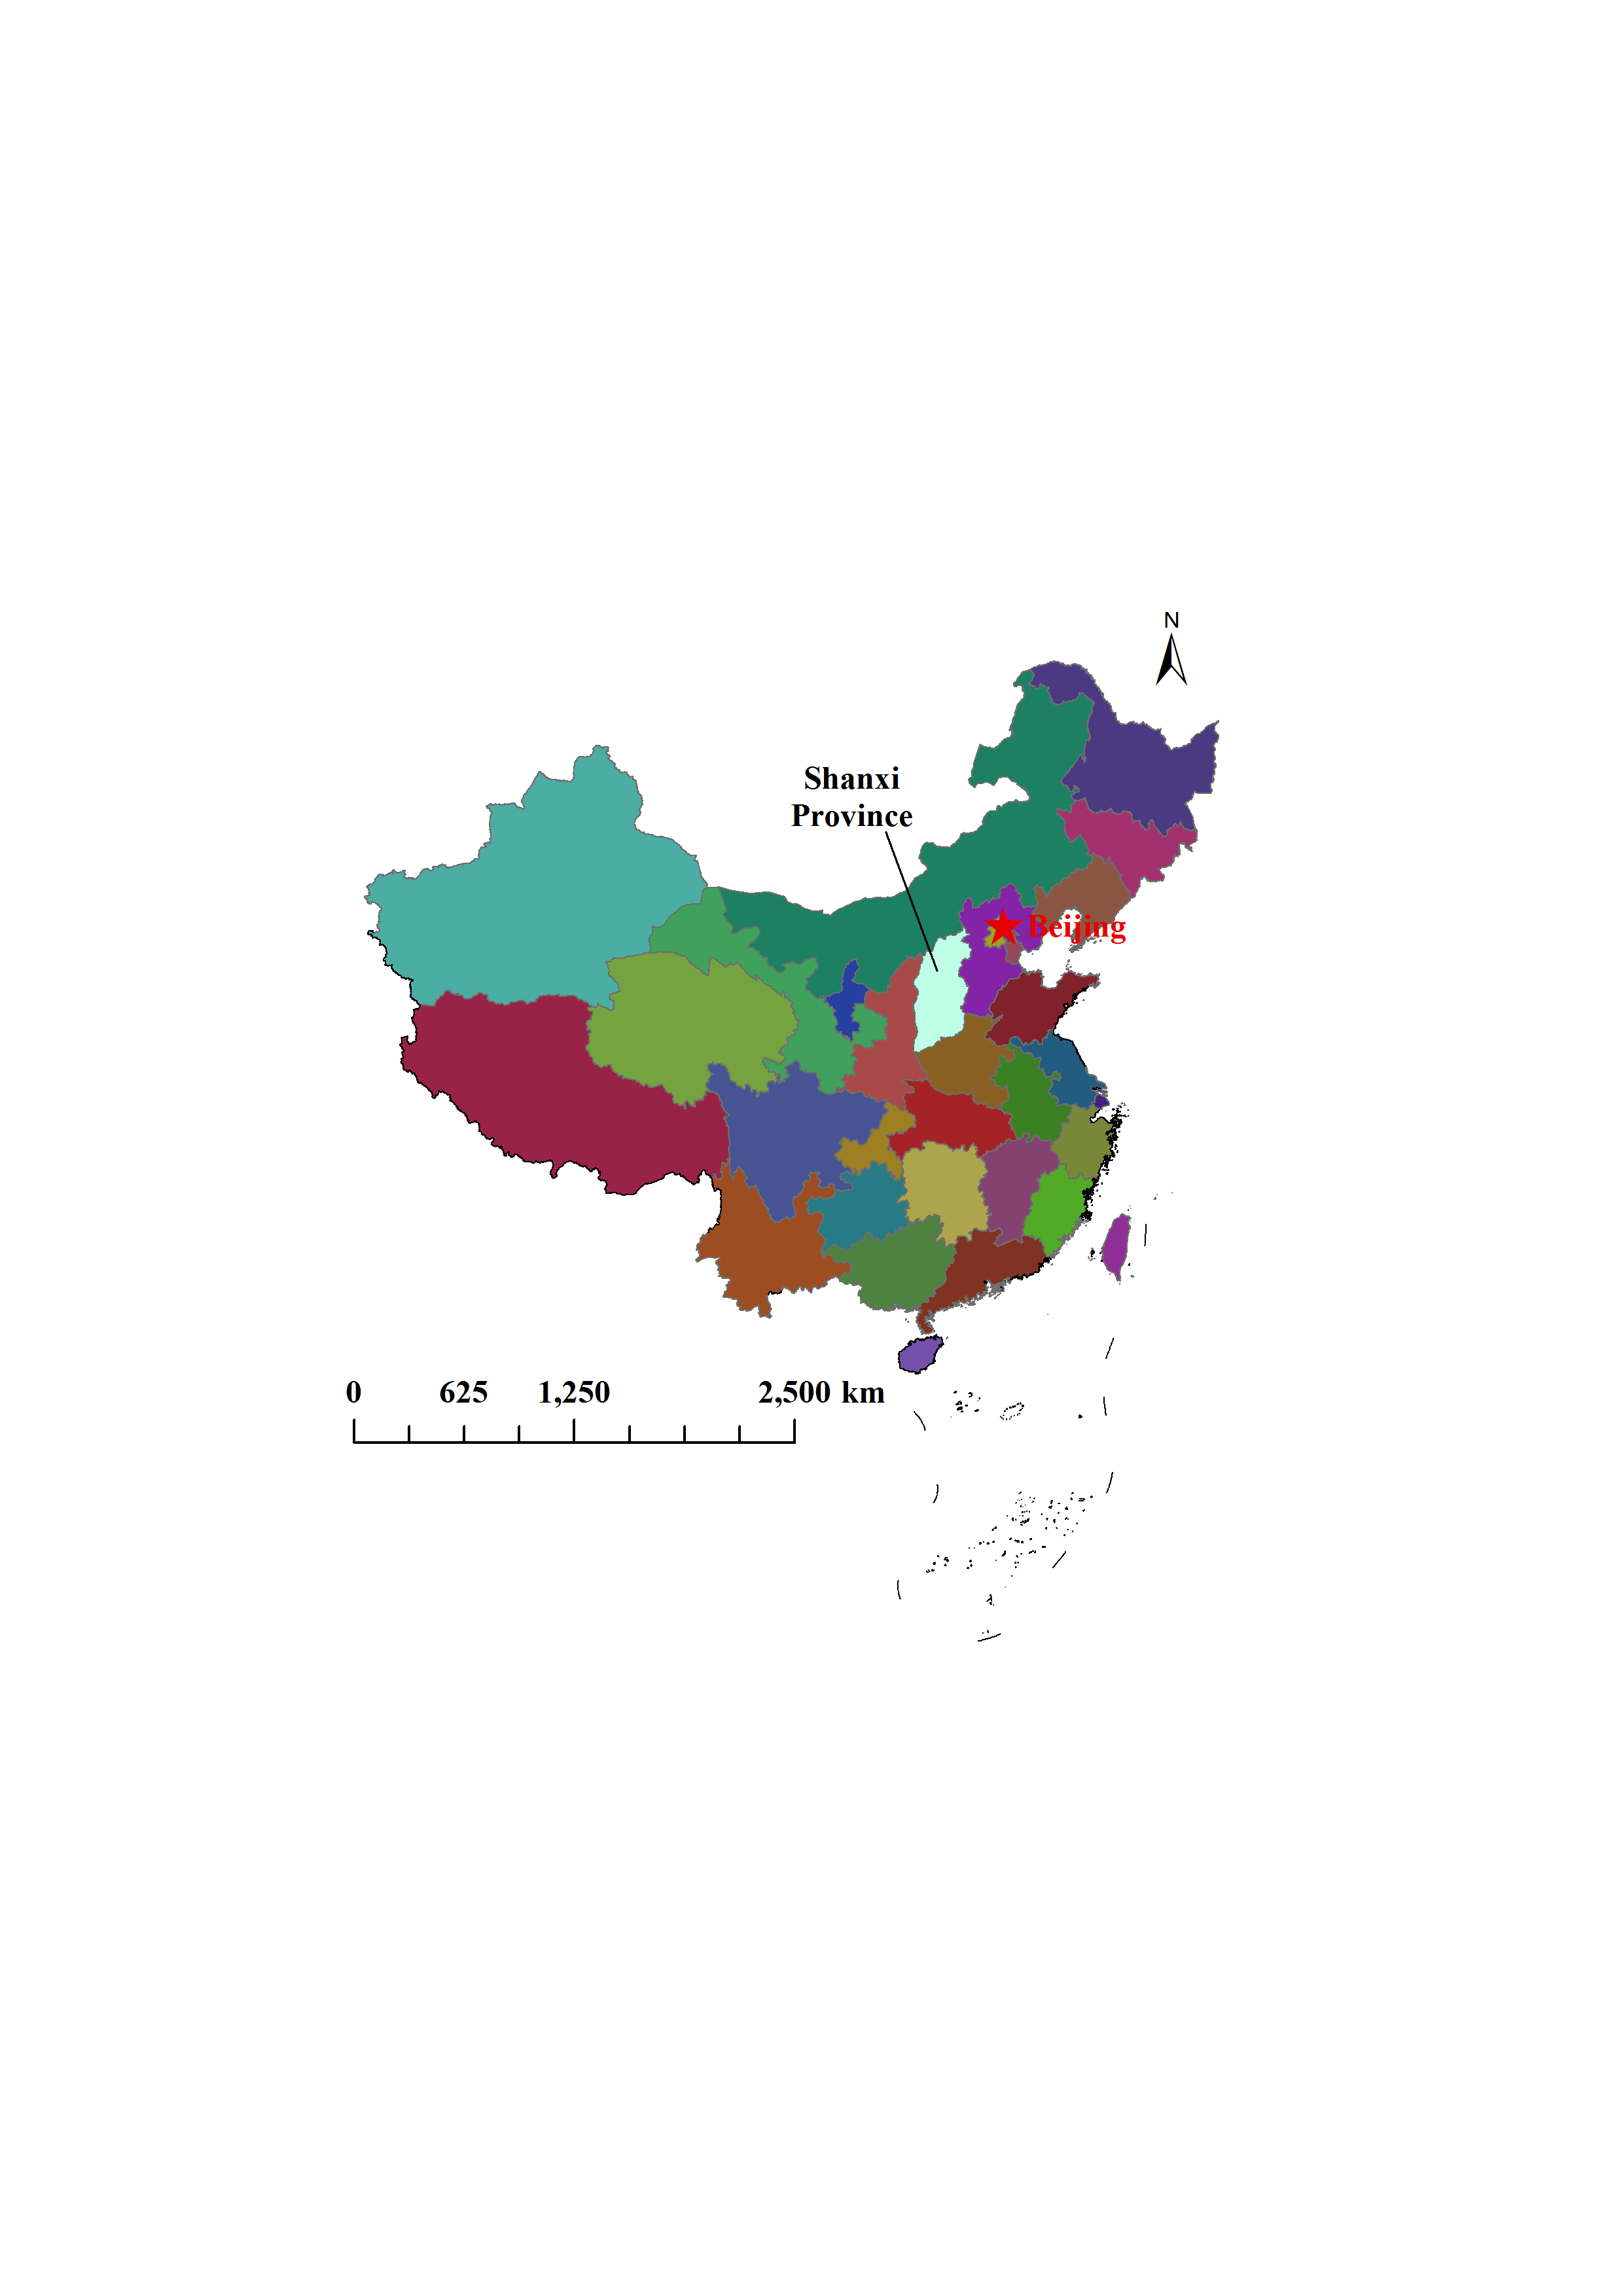  (**a**) | 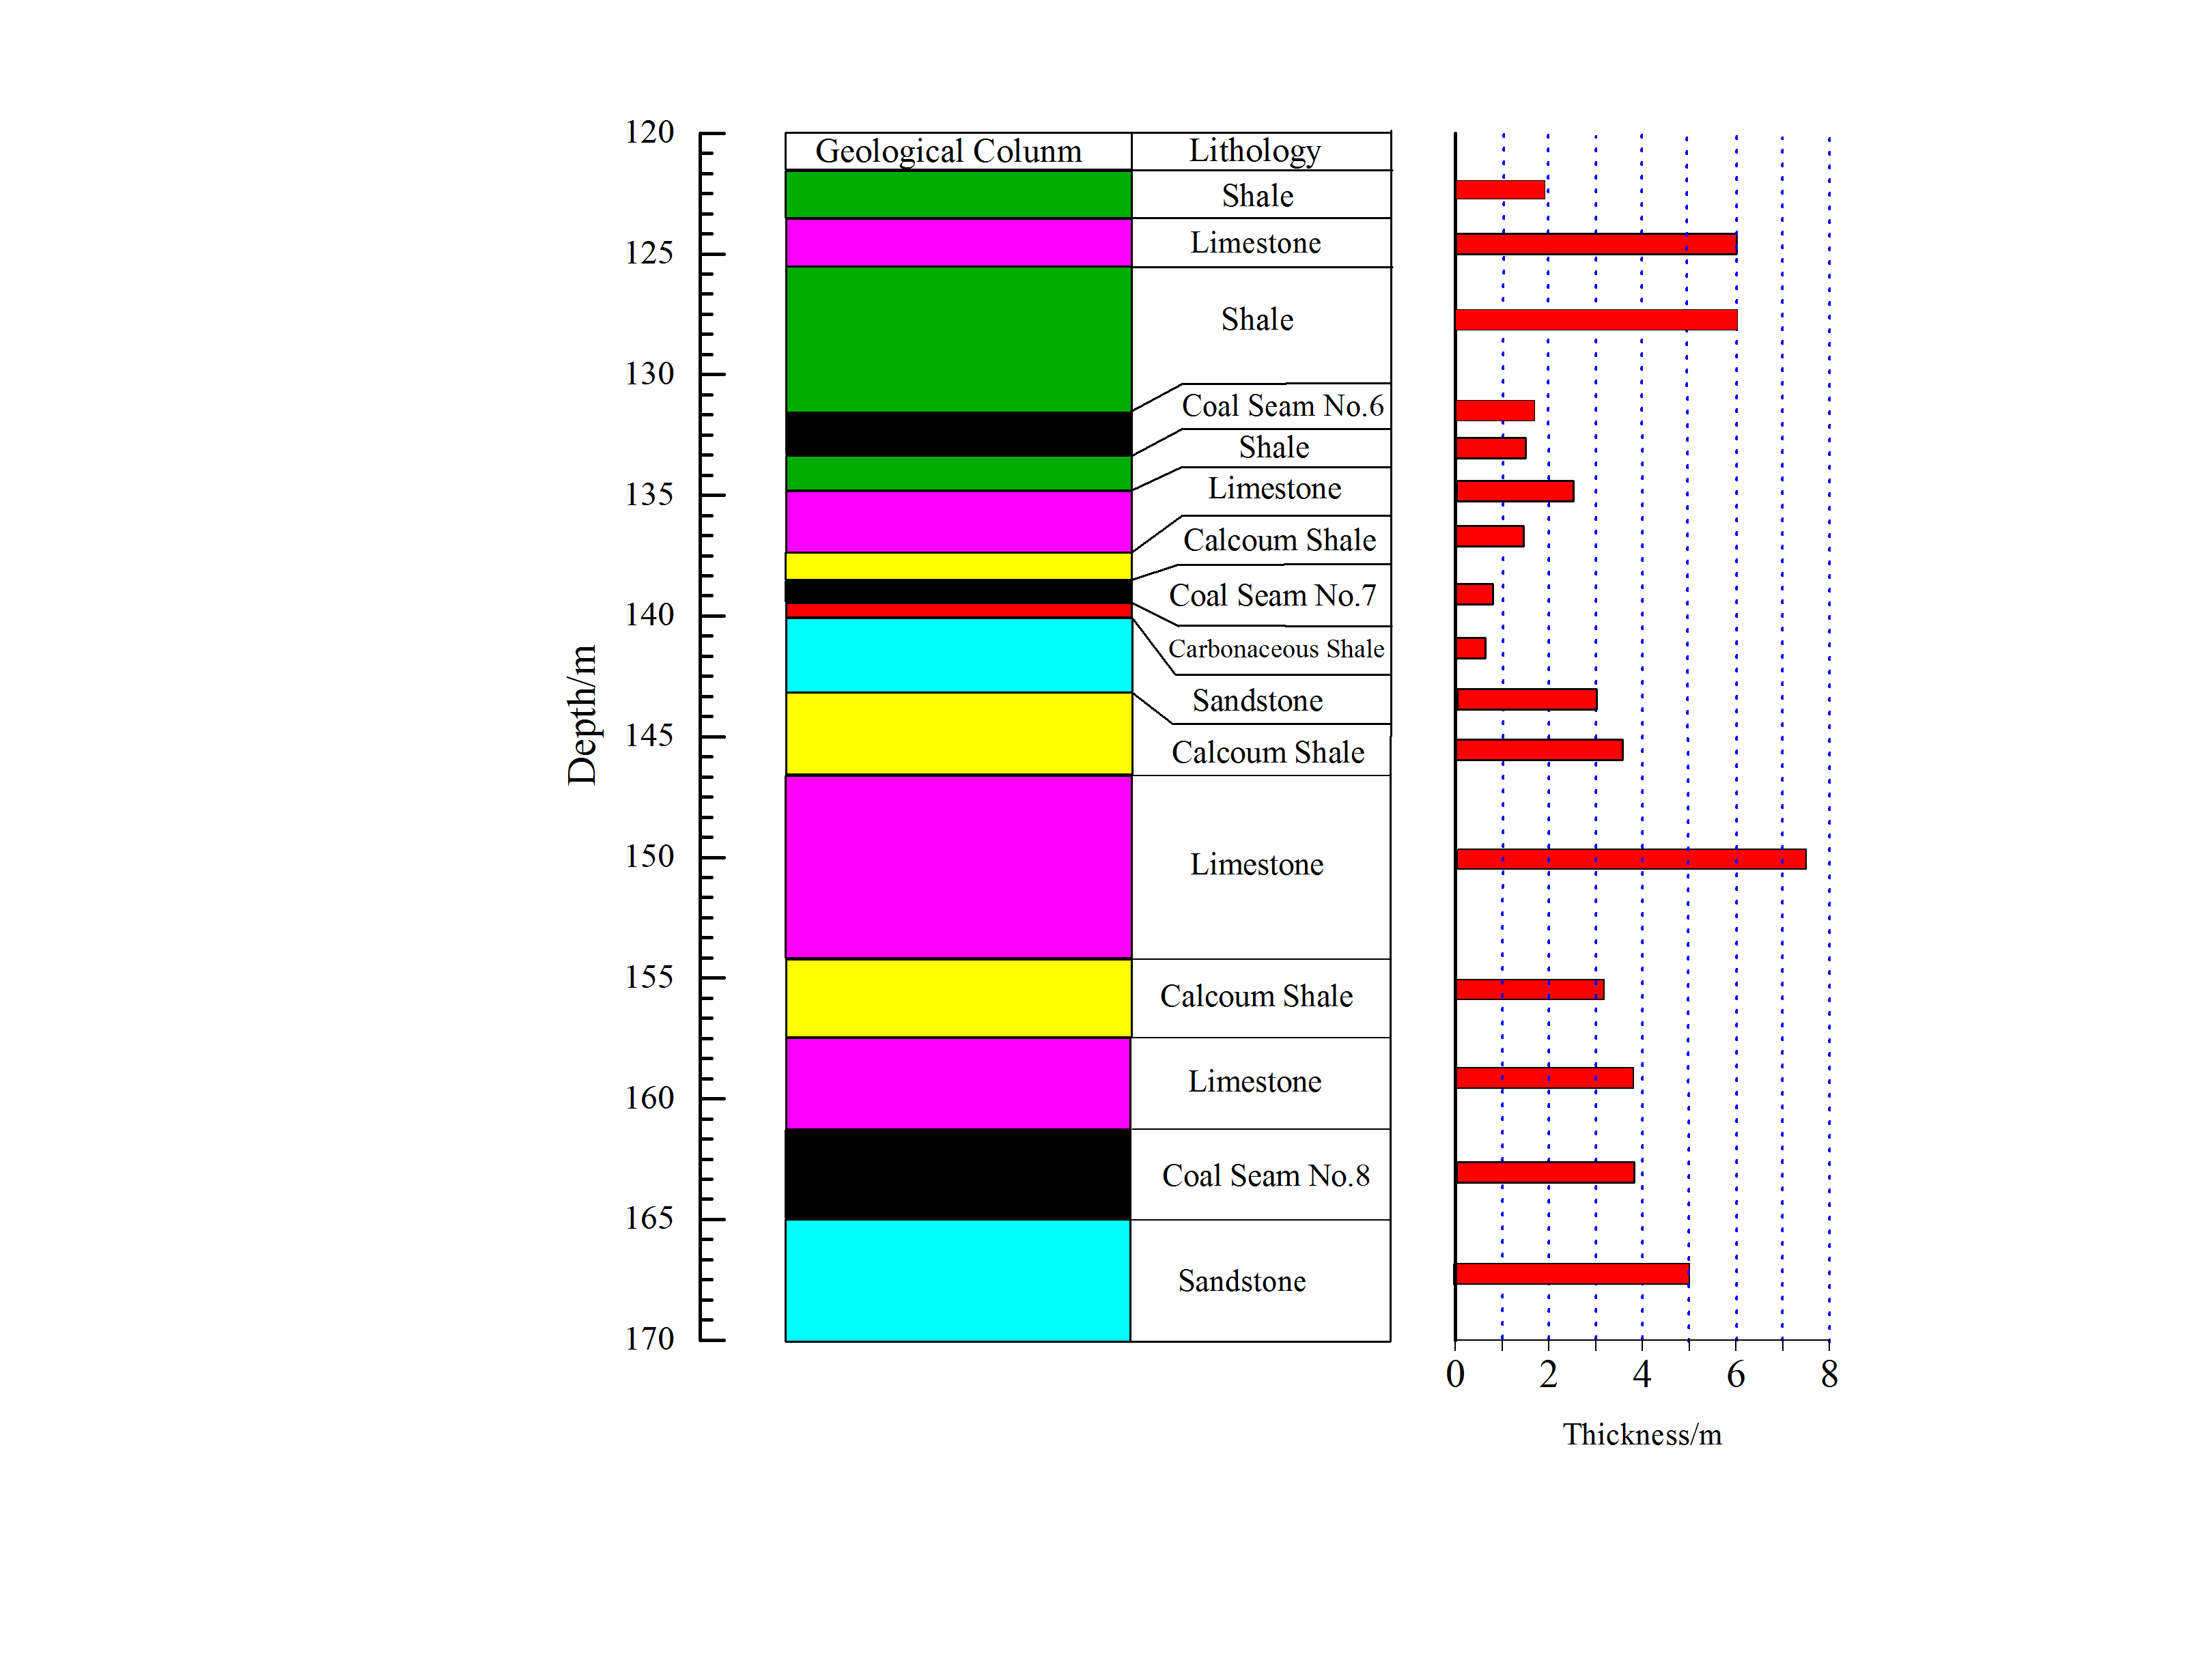  (**c**) |
| --- | --- |
| 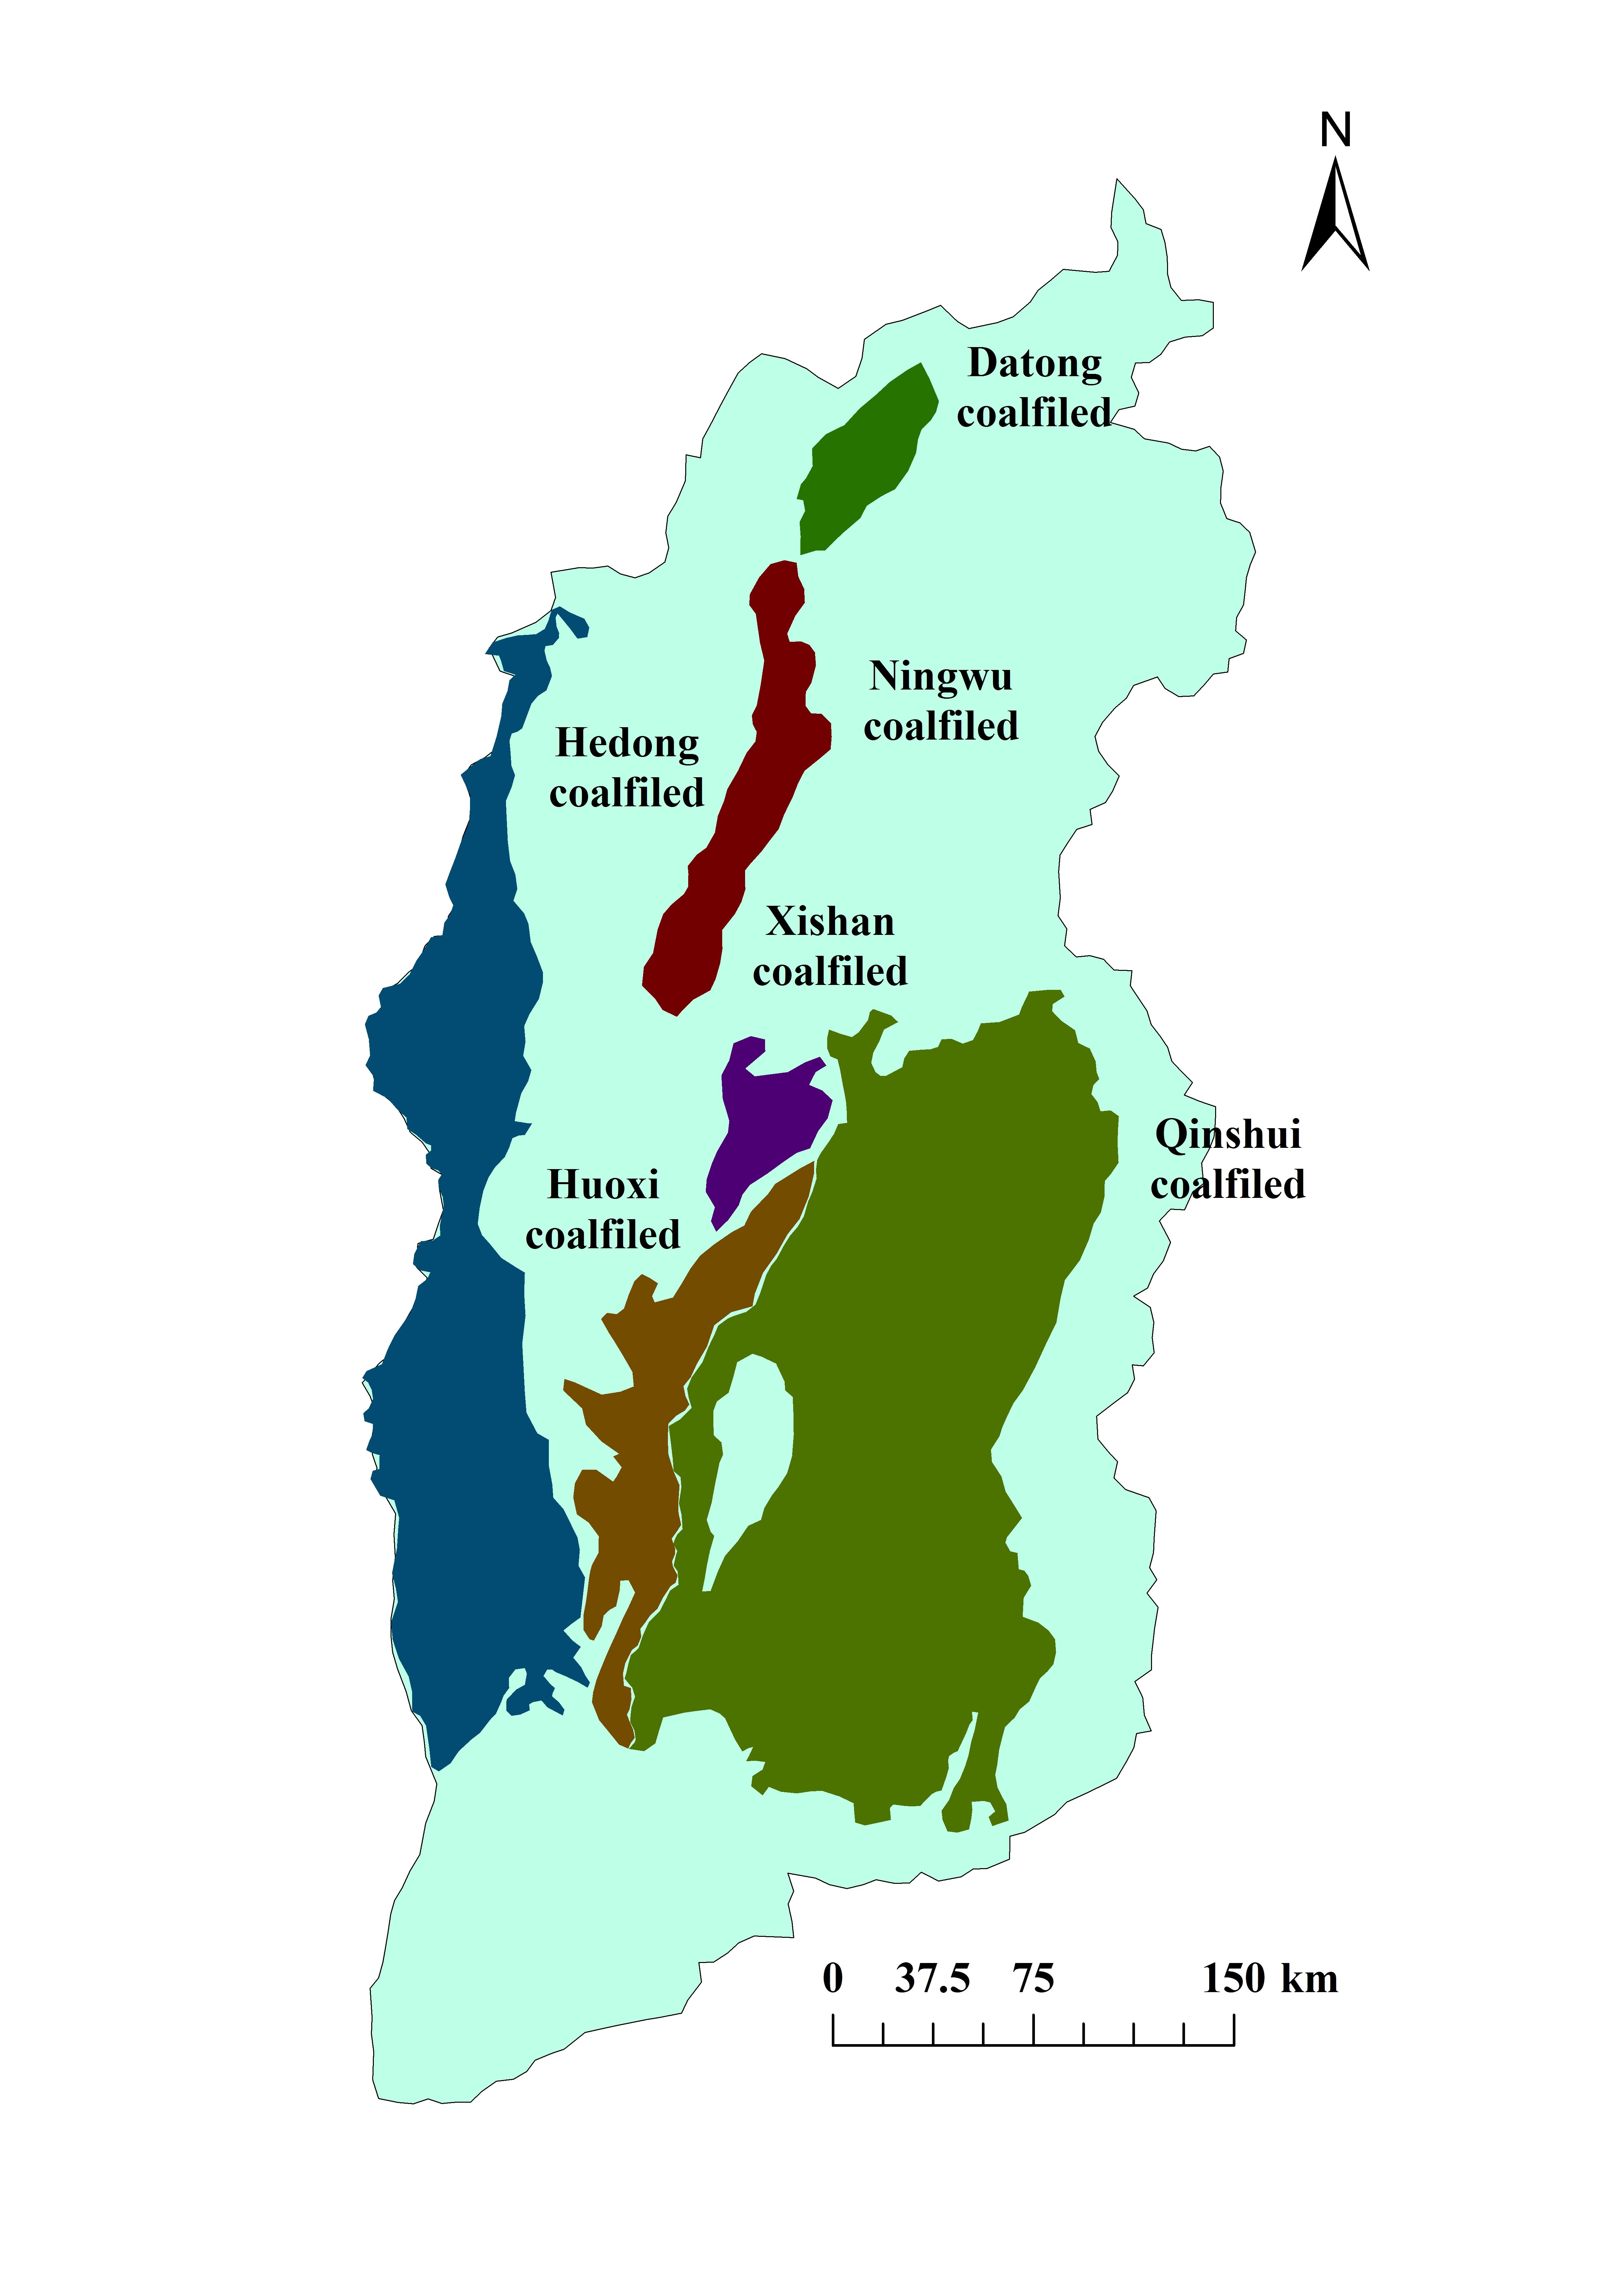  (**b**) |

**Figure 1.** Location of Baijiazhuang coal mine and geological column of target coal seam and rock stratas. **(a)** Shanxi Province of China; **(b)** Xishan coalfield in Shanxi Province; **(c)** Typical geological column of target coal seams and rock stratas in Baijiazhuang coal mine.

| 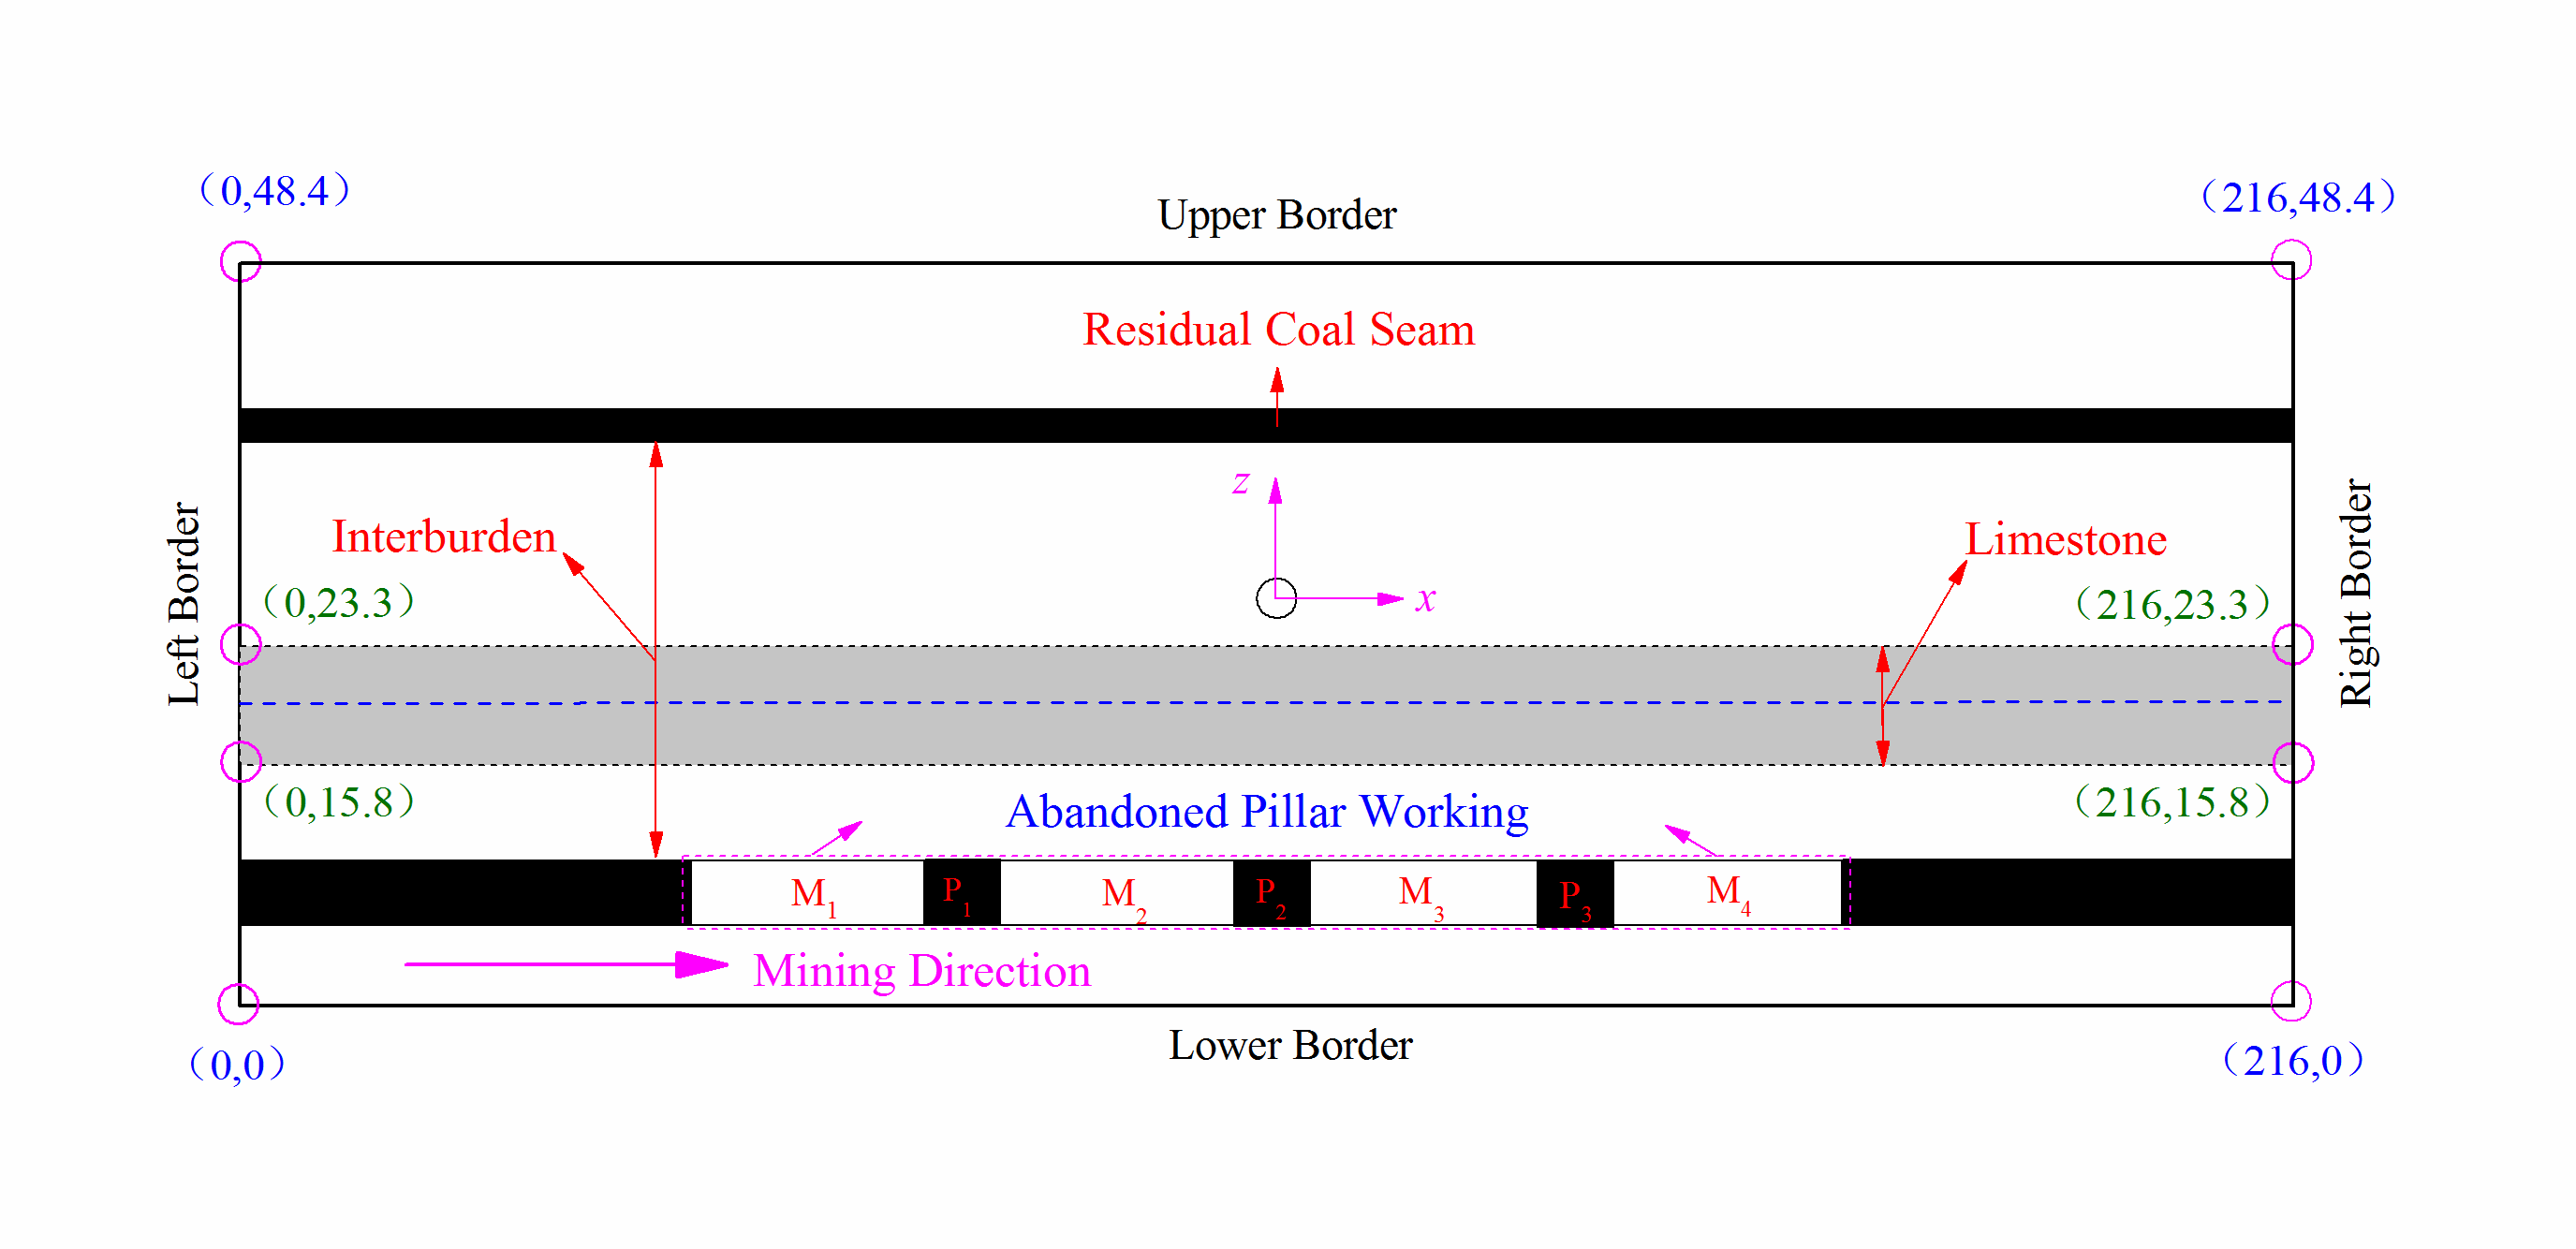 |
| --- |

**Figure 2.** Distribution of 38502 abandoned pillar working and residual coal seam, in which the limestone with 7.5m was selected as the target strata to be investigated

| **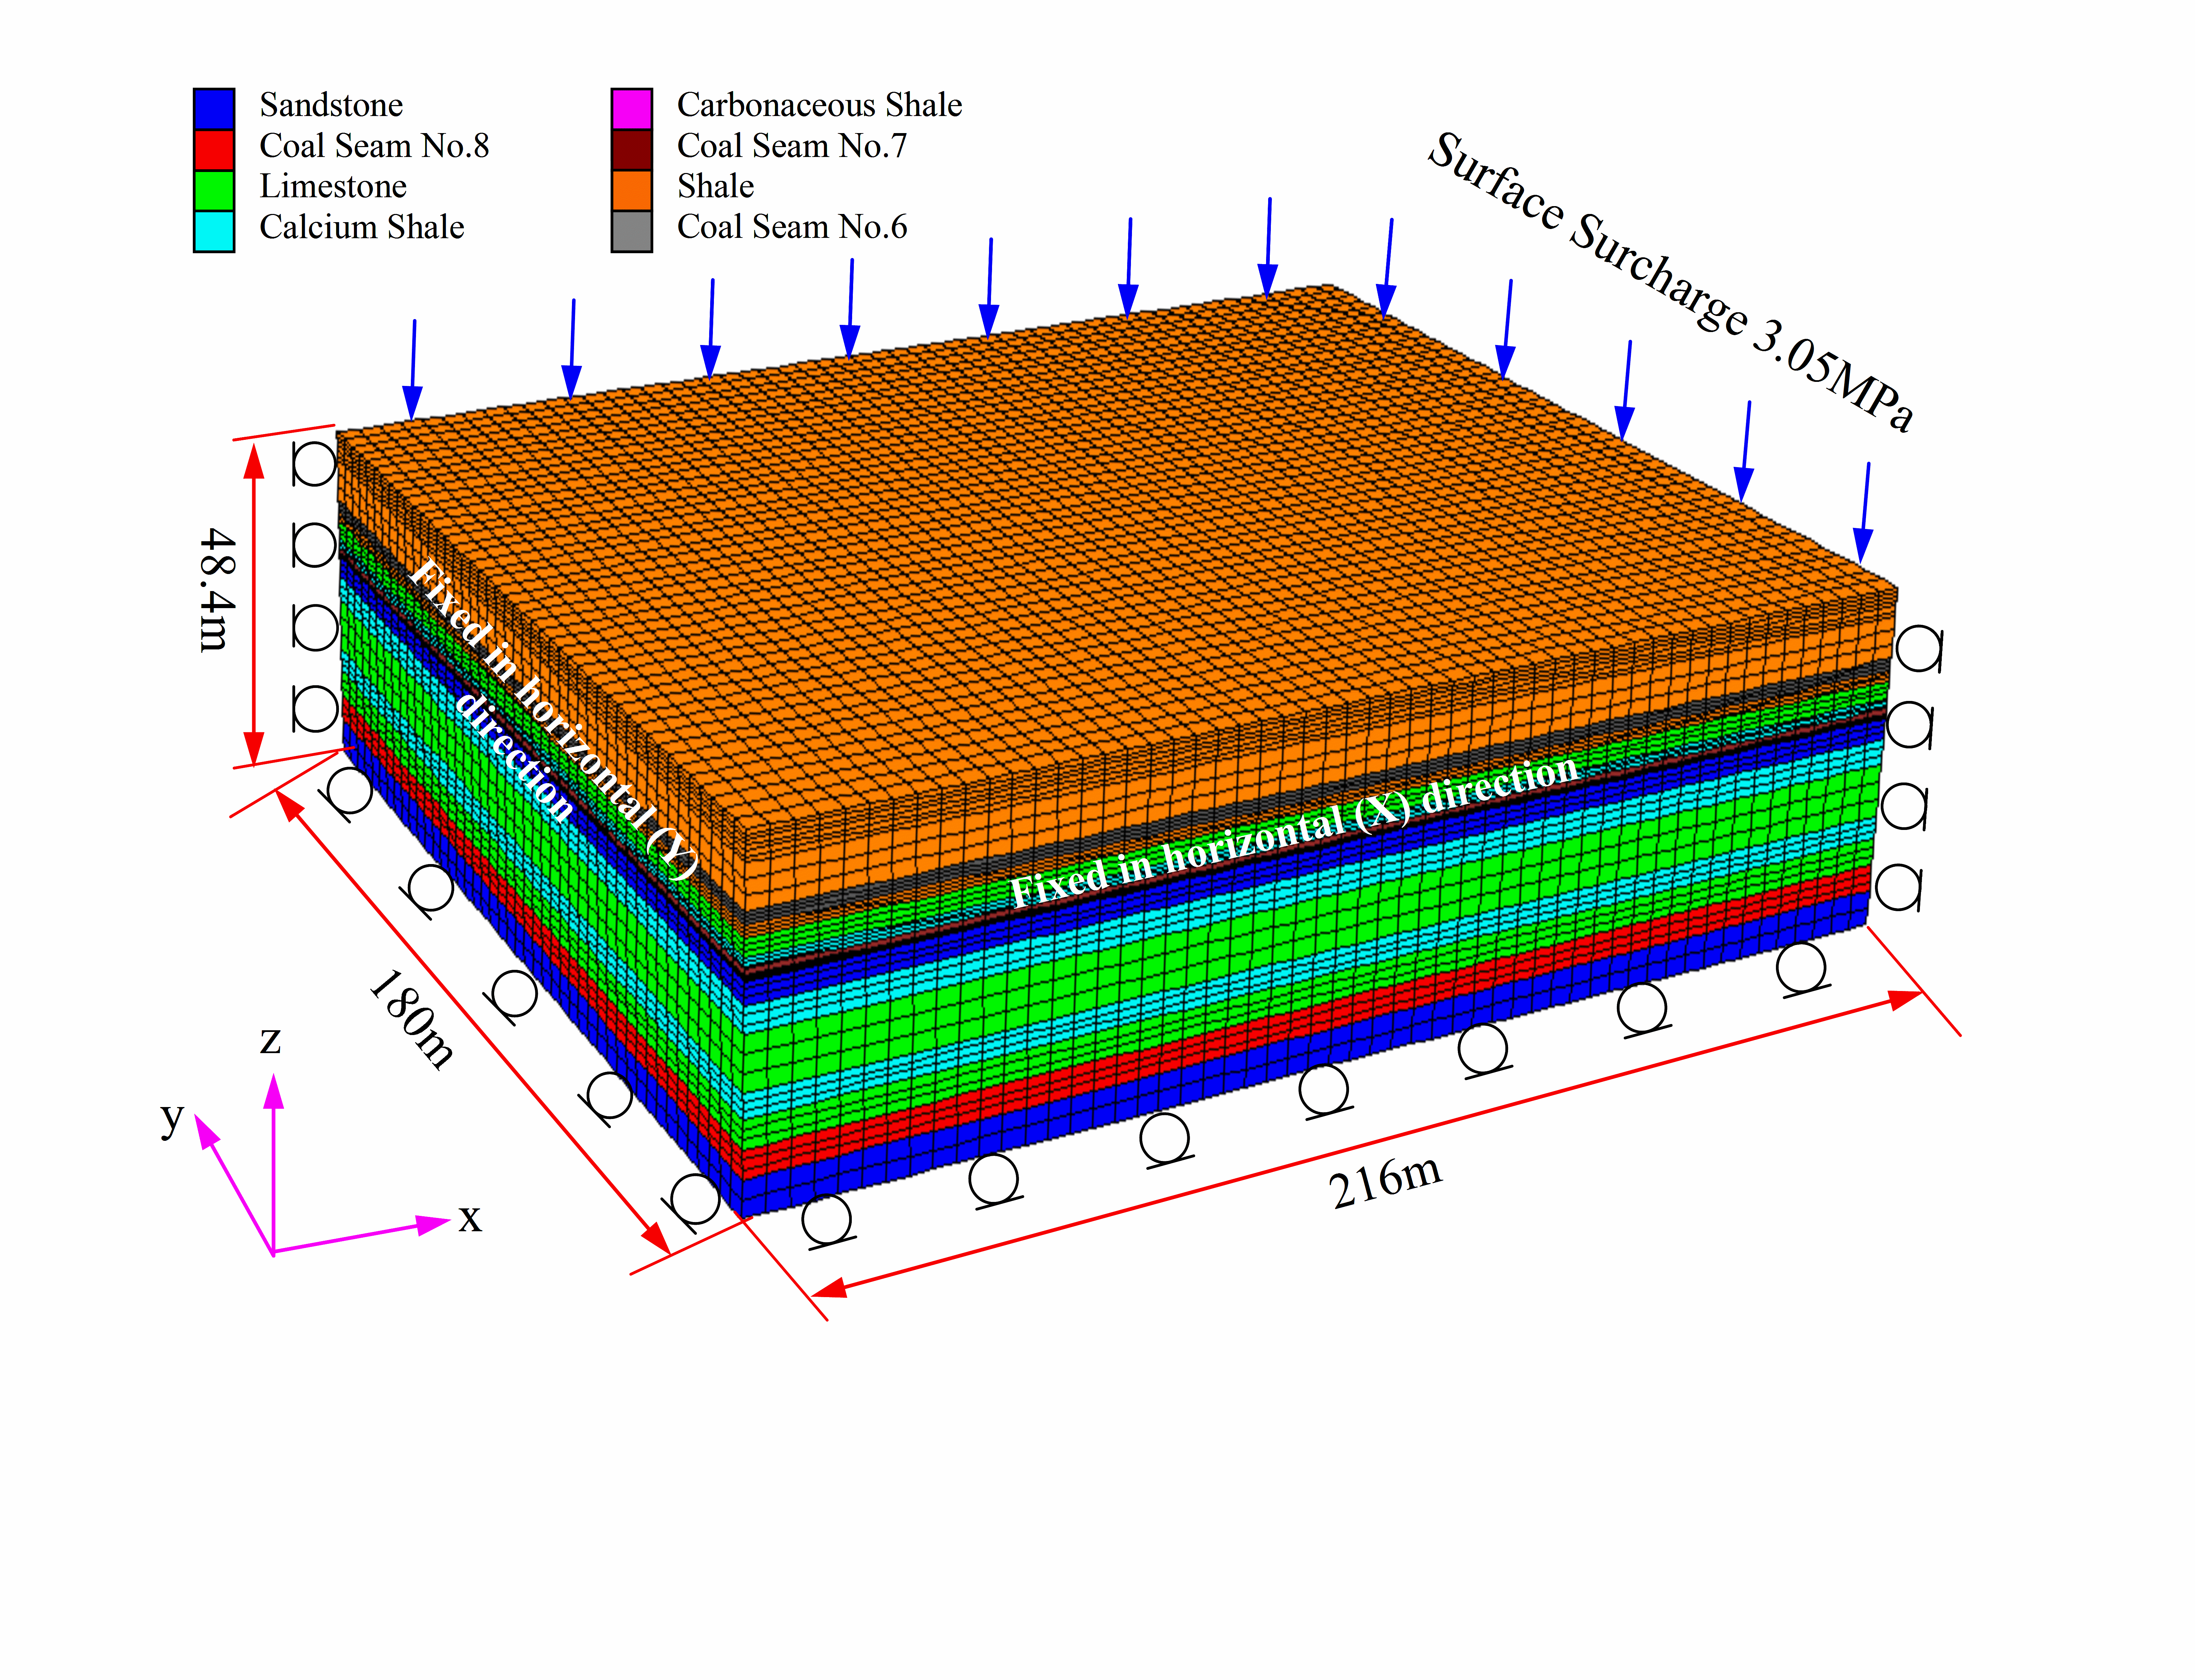** |
| --- |

**Figure 3.** Geometric parameter and boundary conditions of numerical model.

| 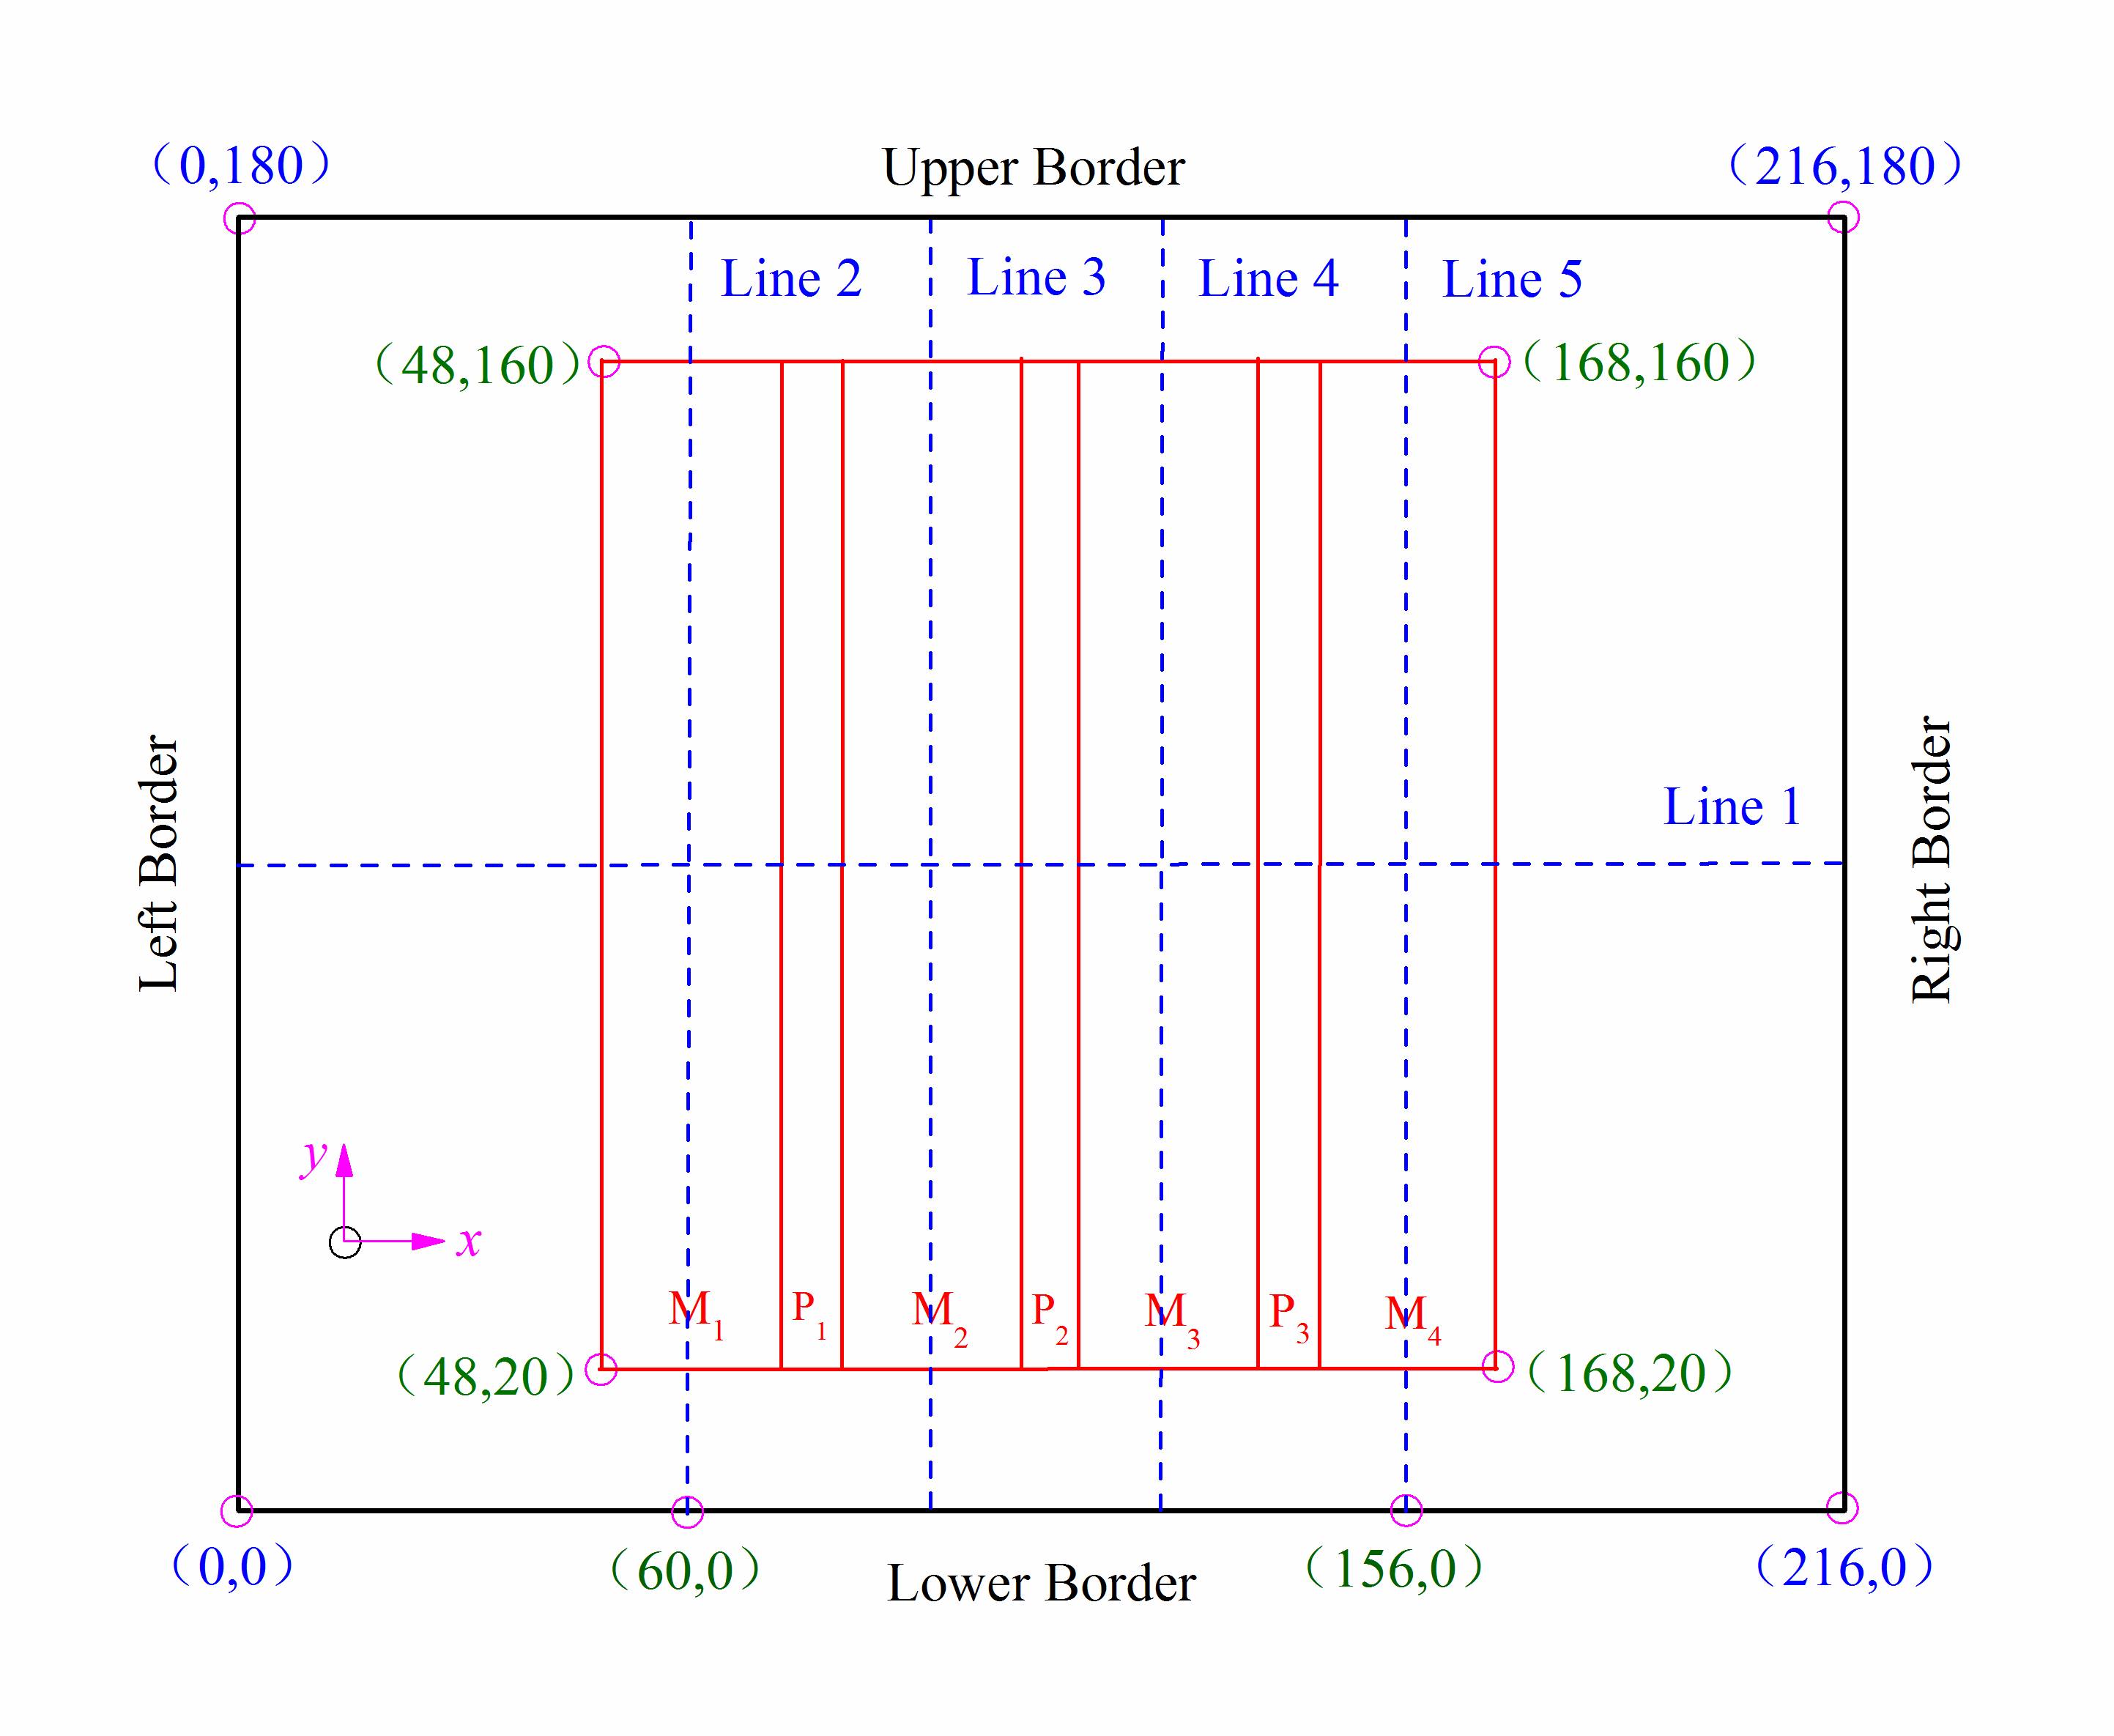 |
| --- |

**Figure 4.** Layout of monitoring lines in the target strata.

| 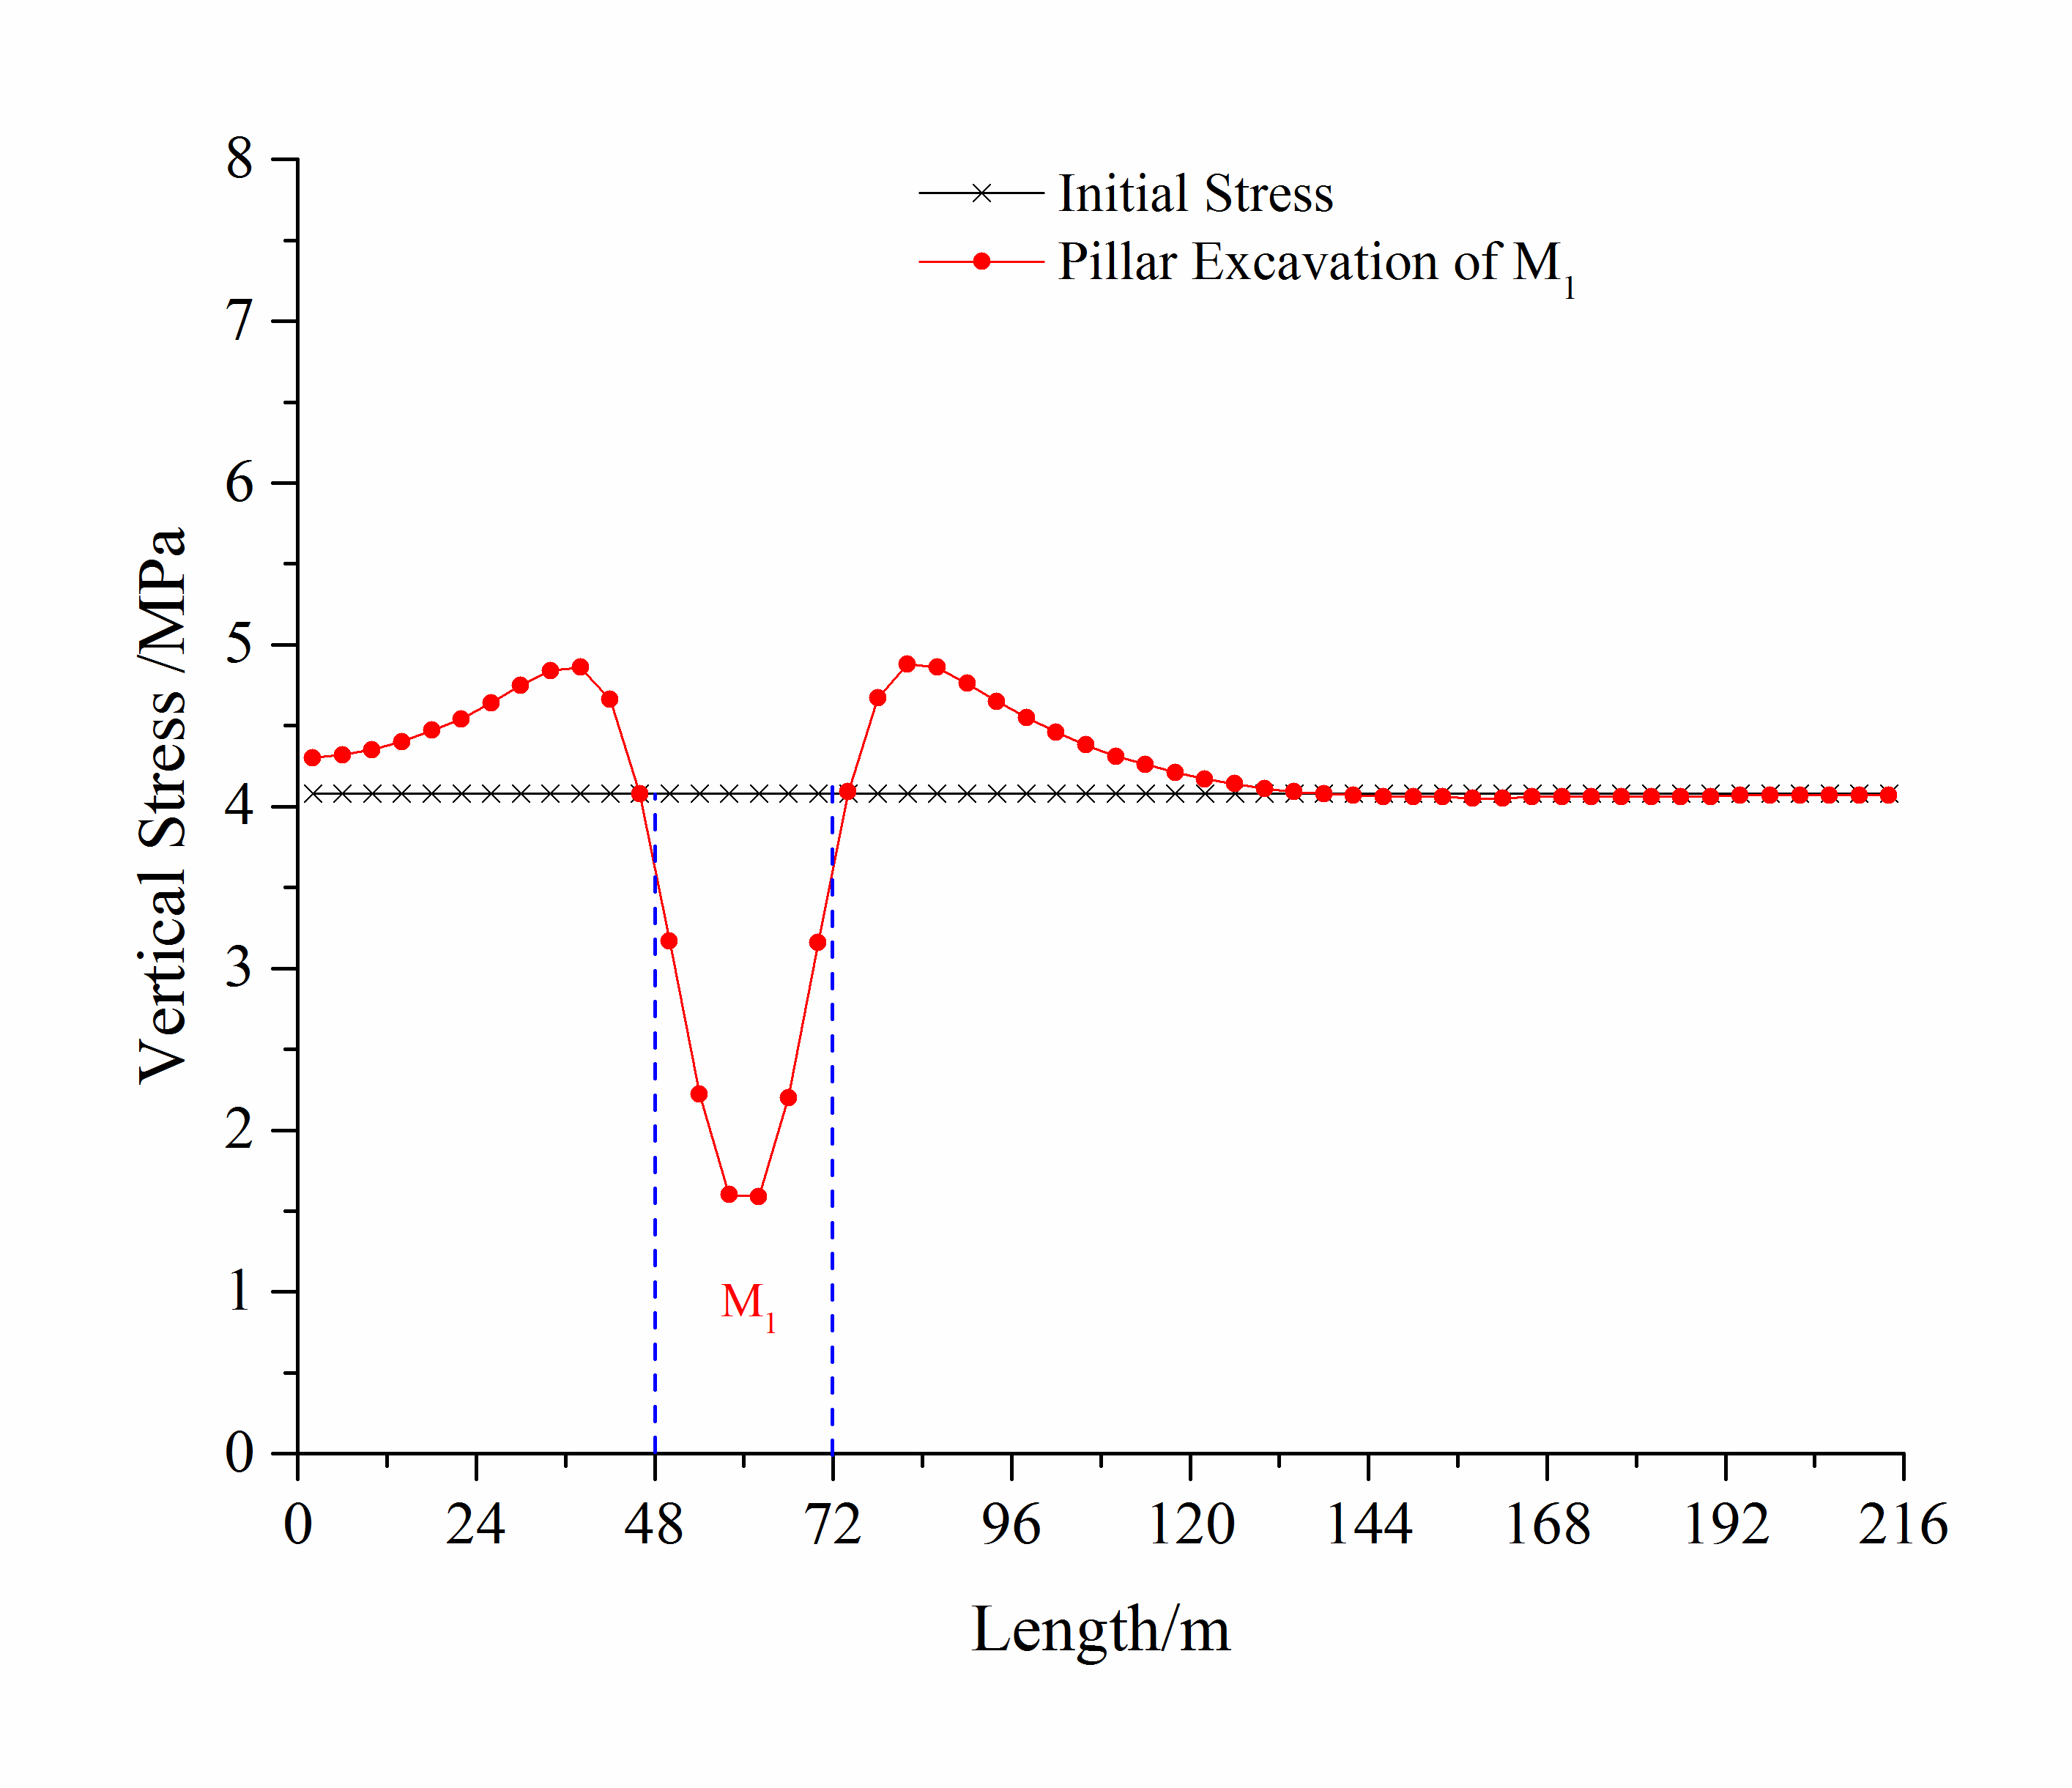  (**a**) | 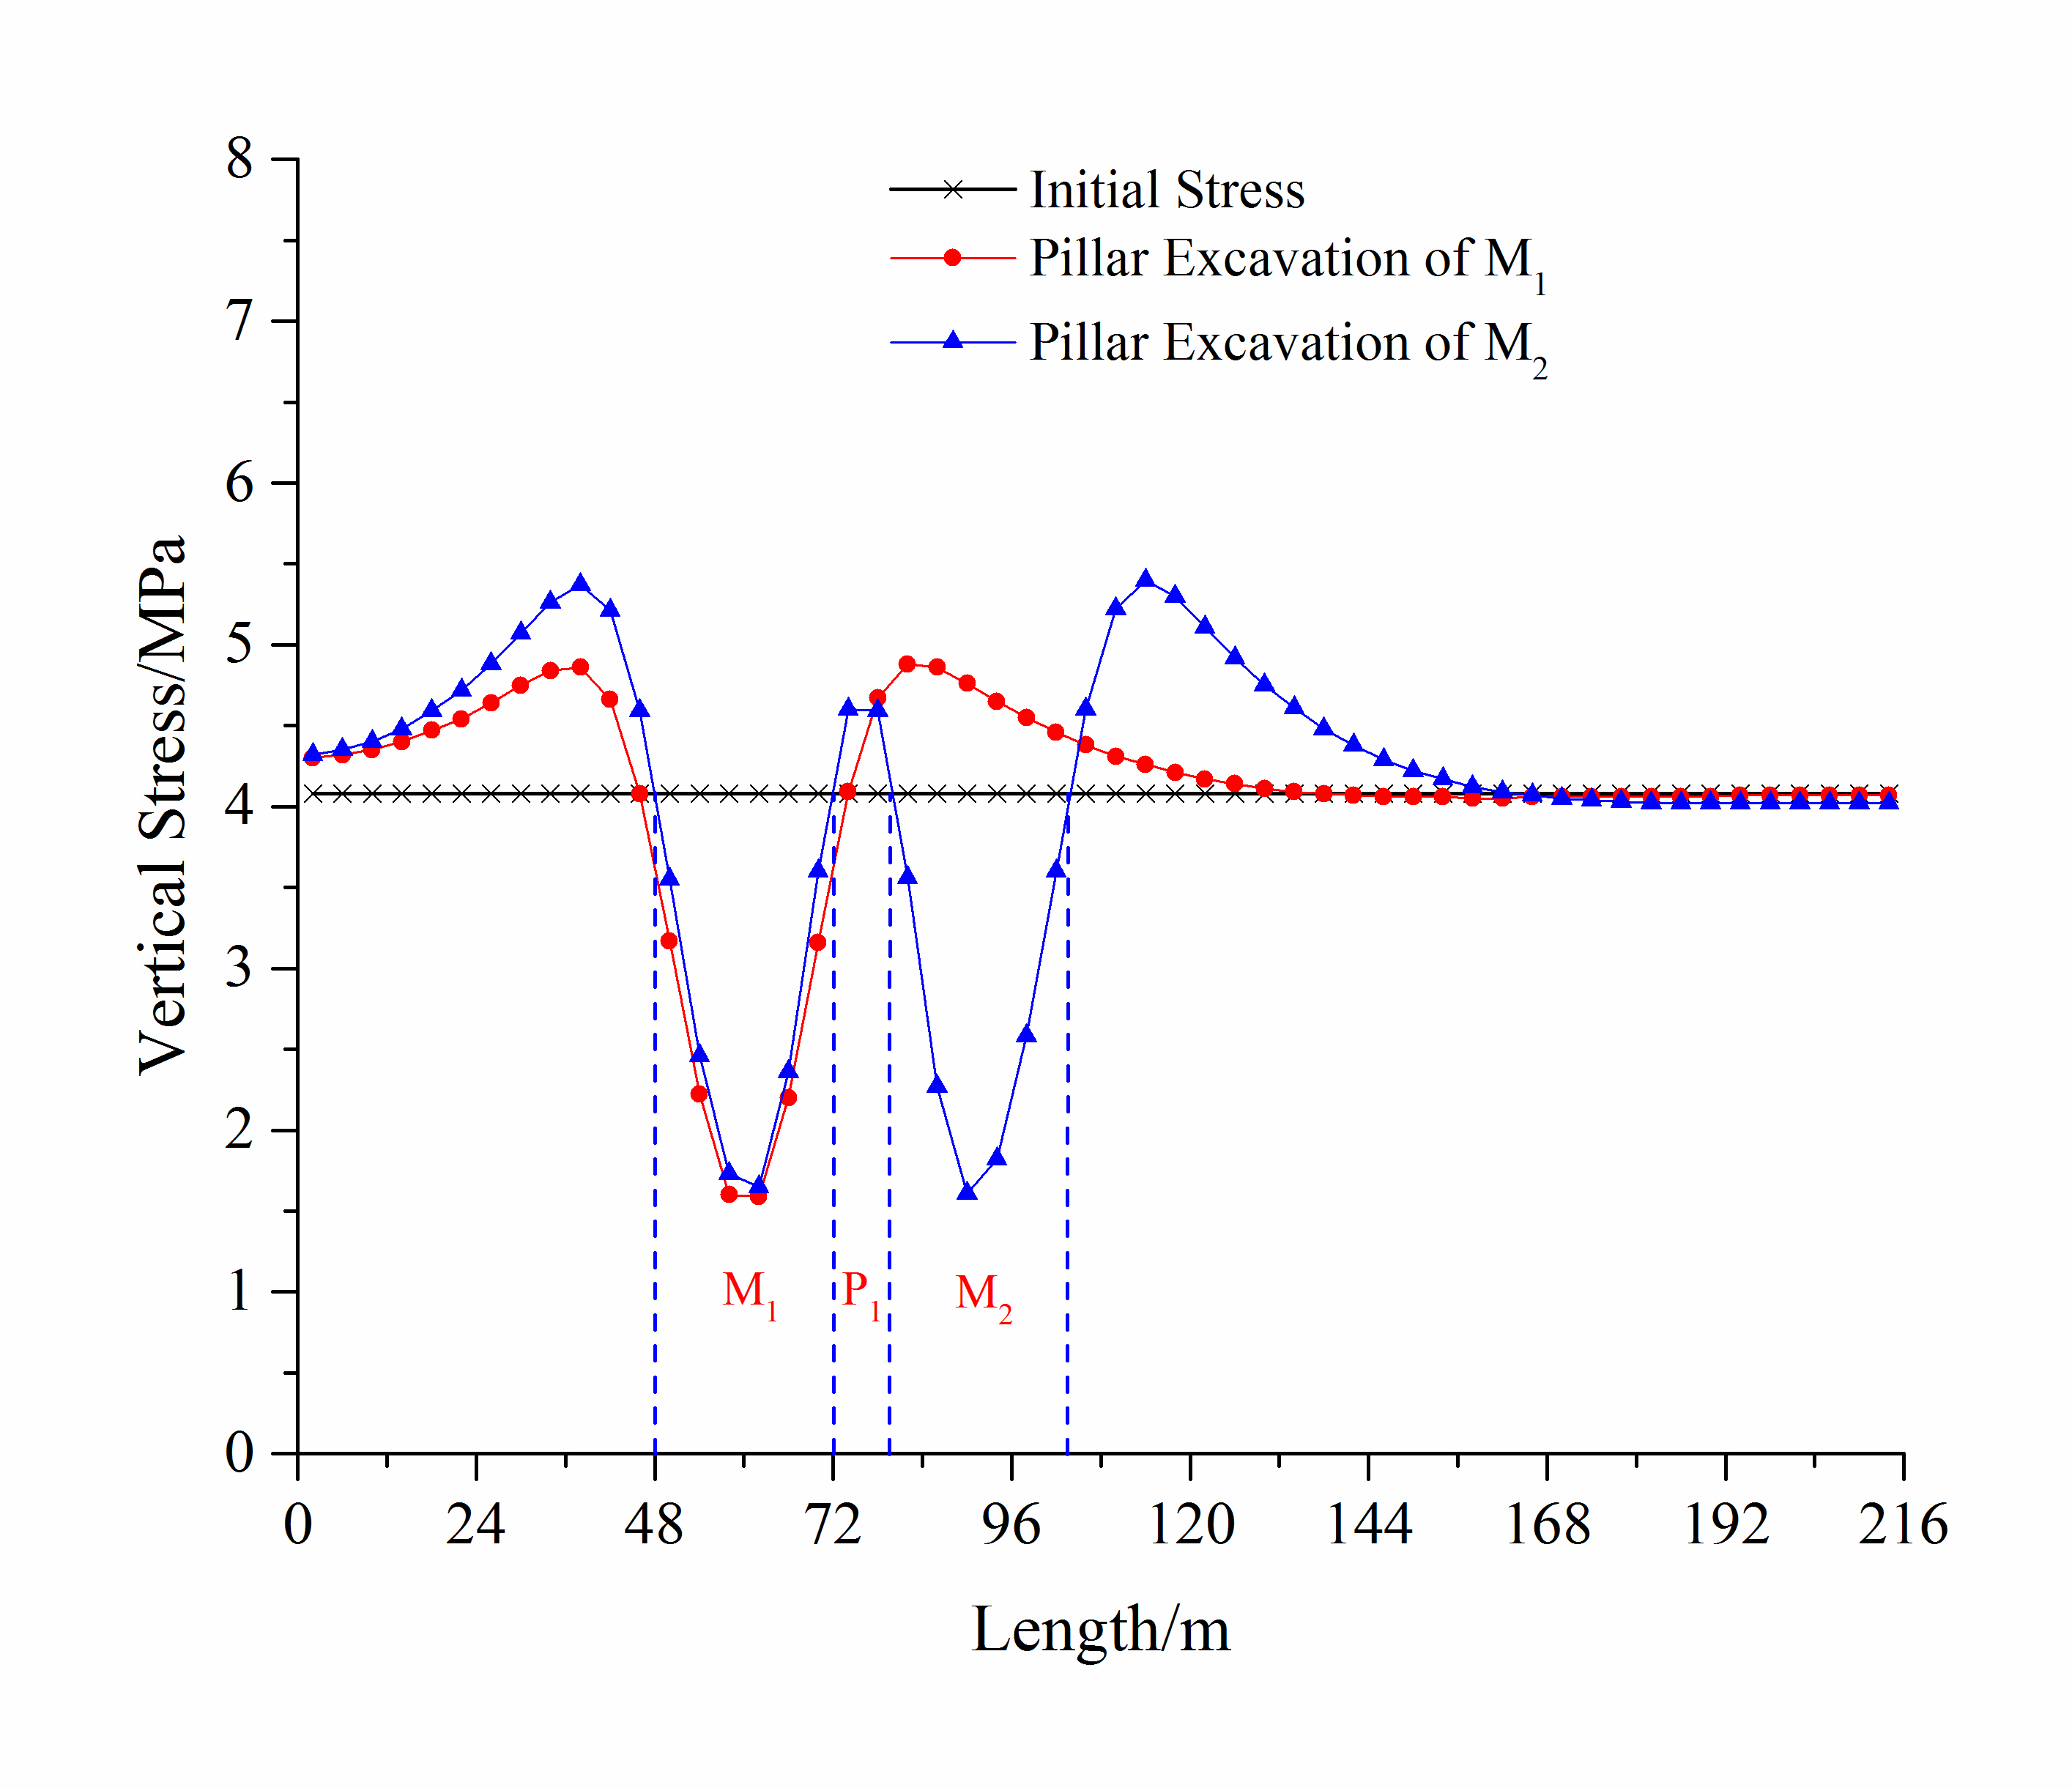  (**b**) |
| --- | --- |
| 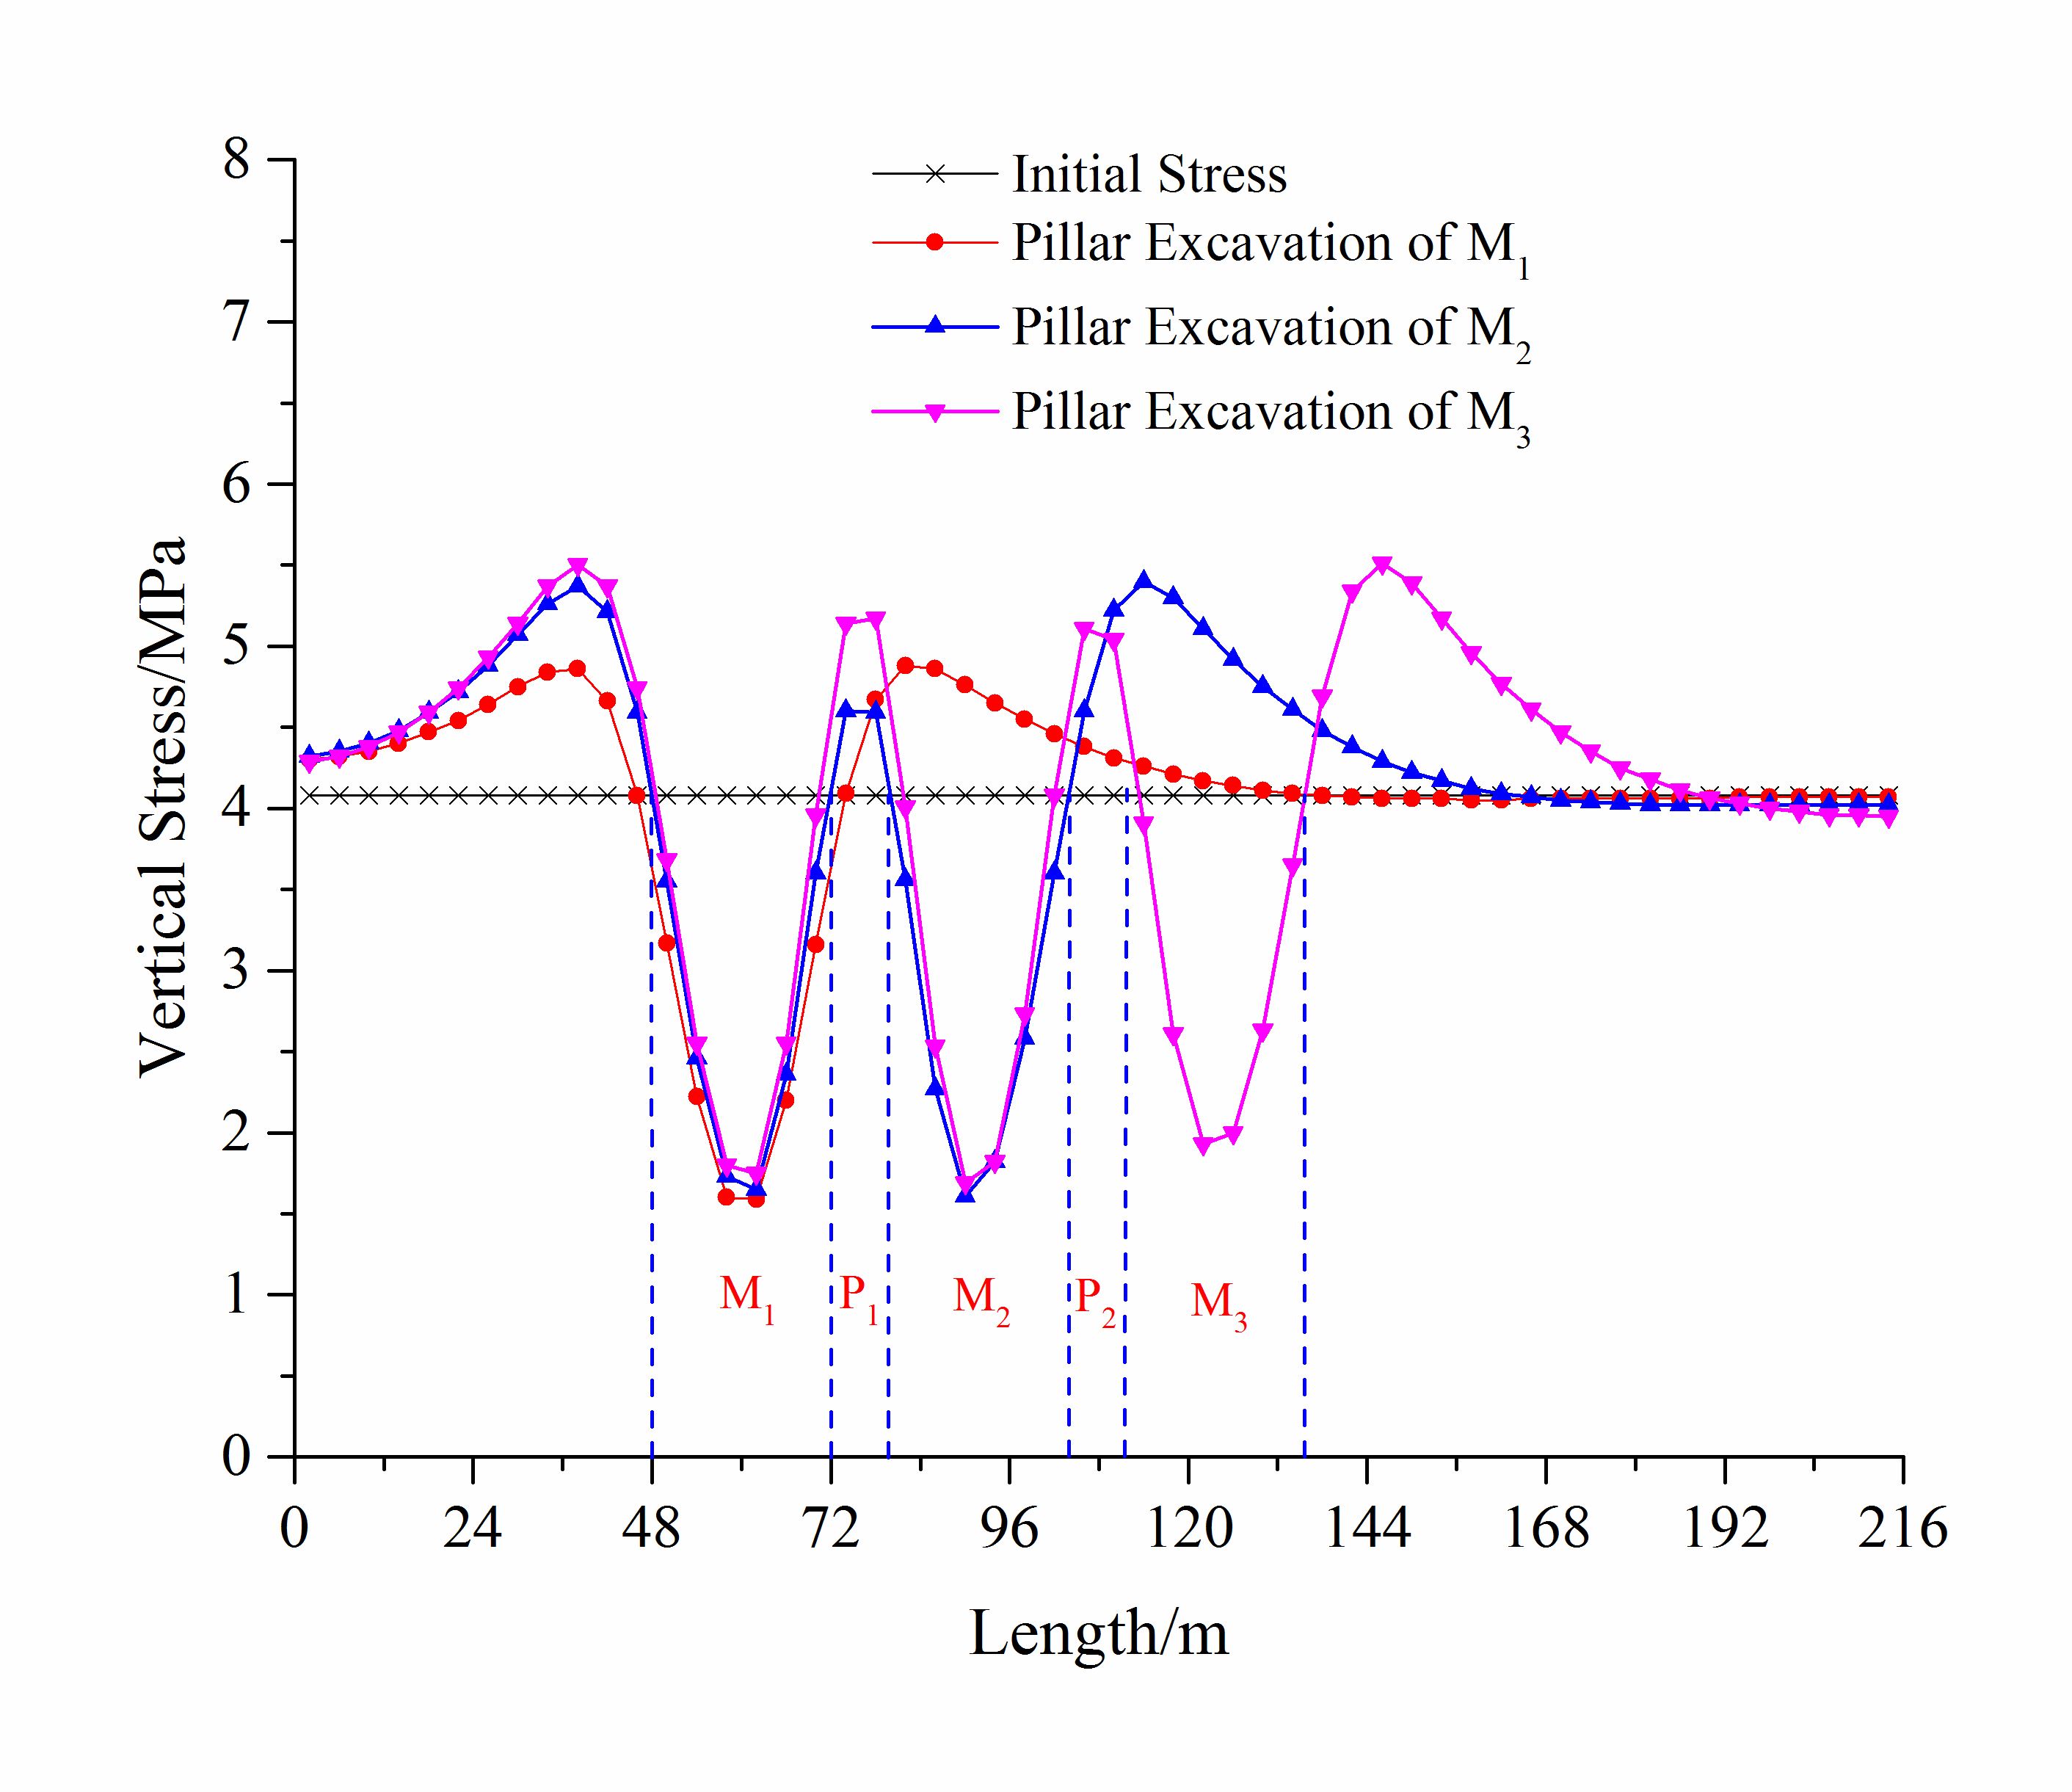  (**c**) | 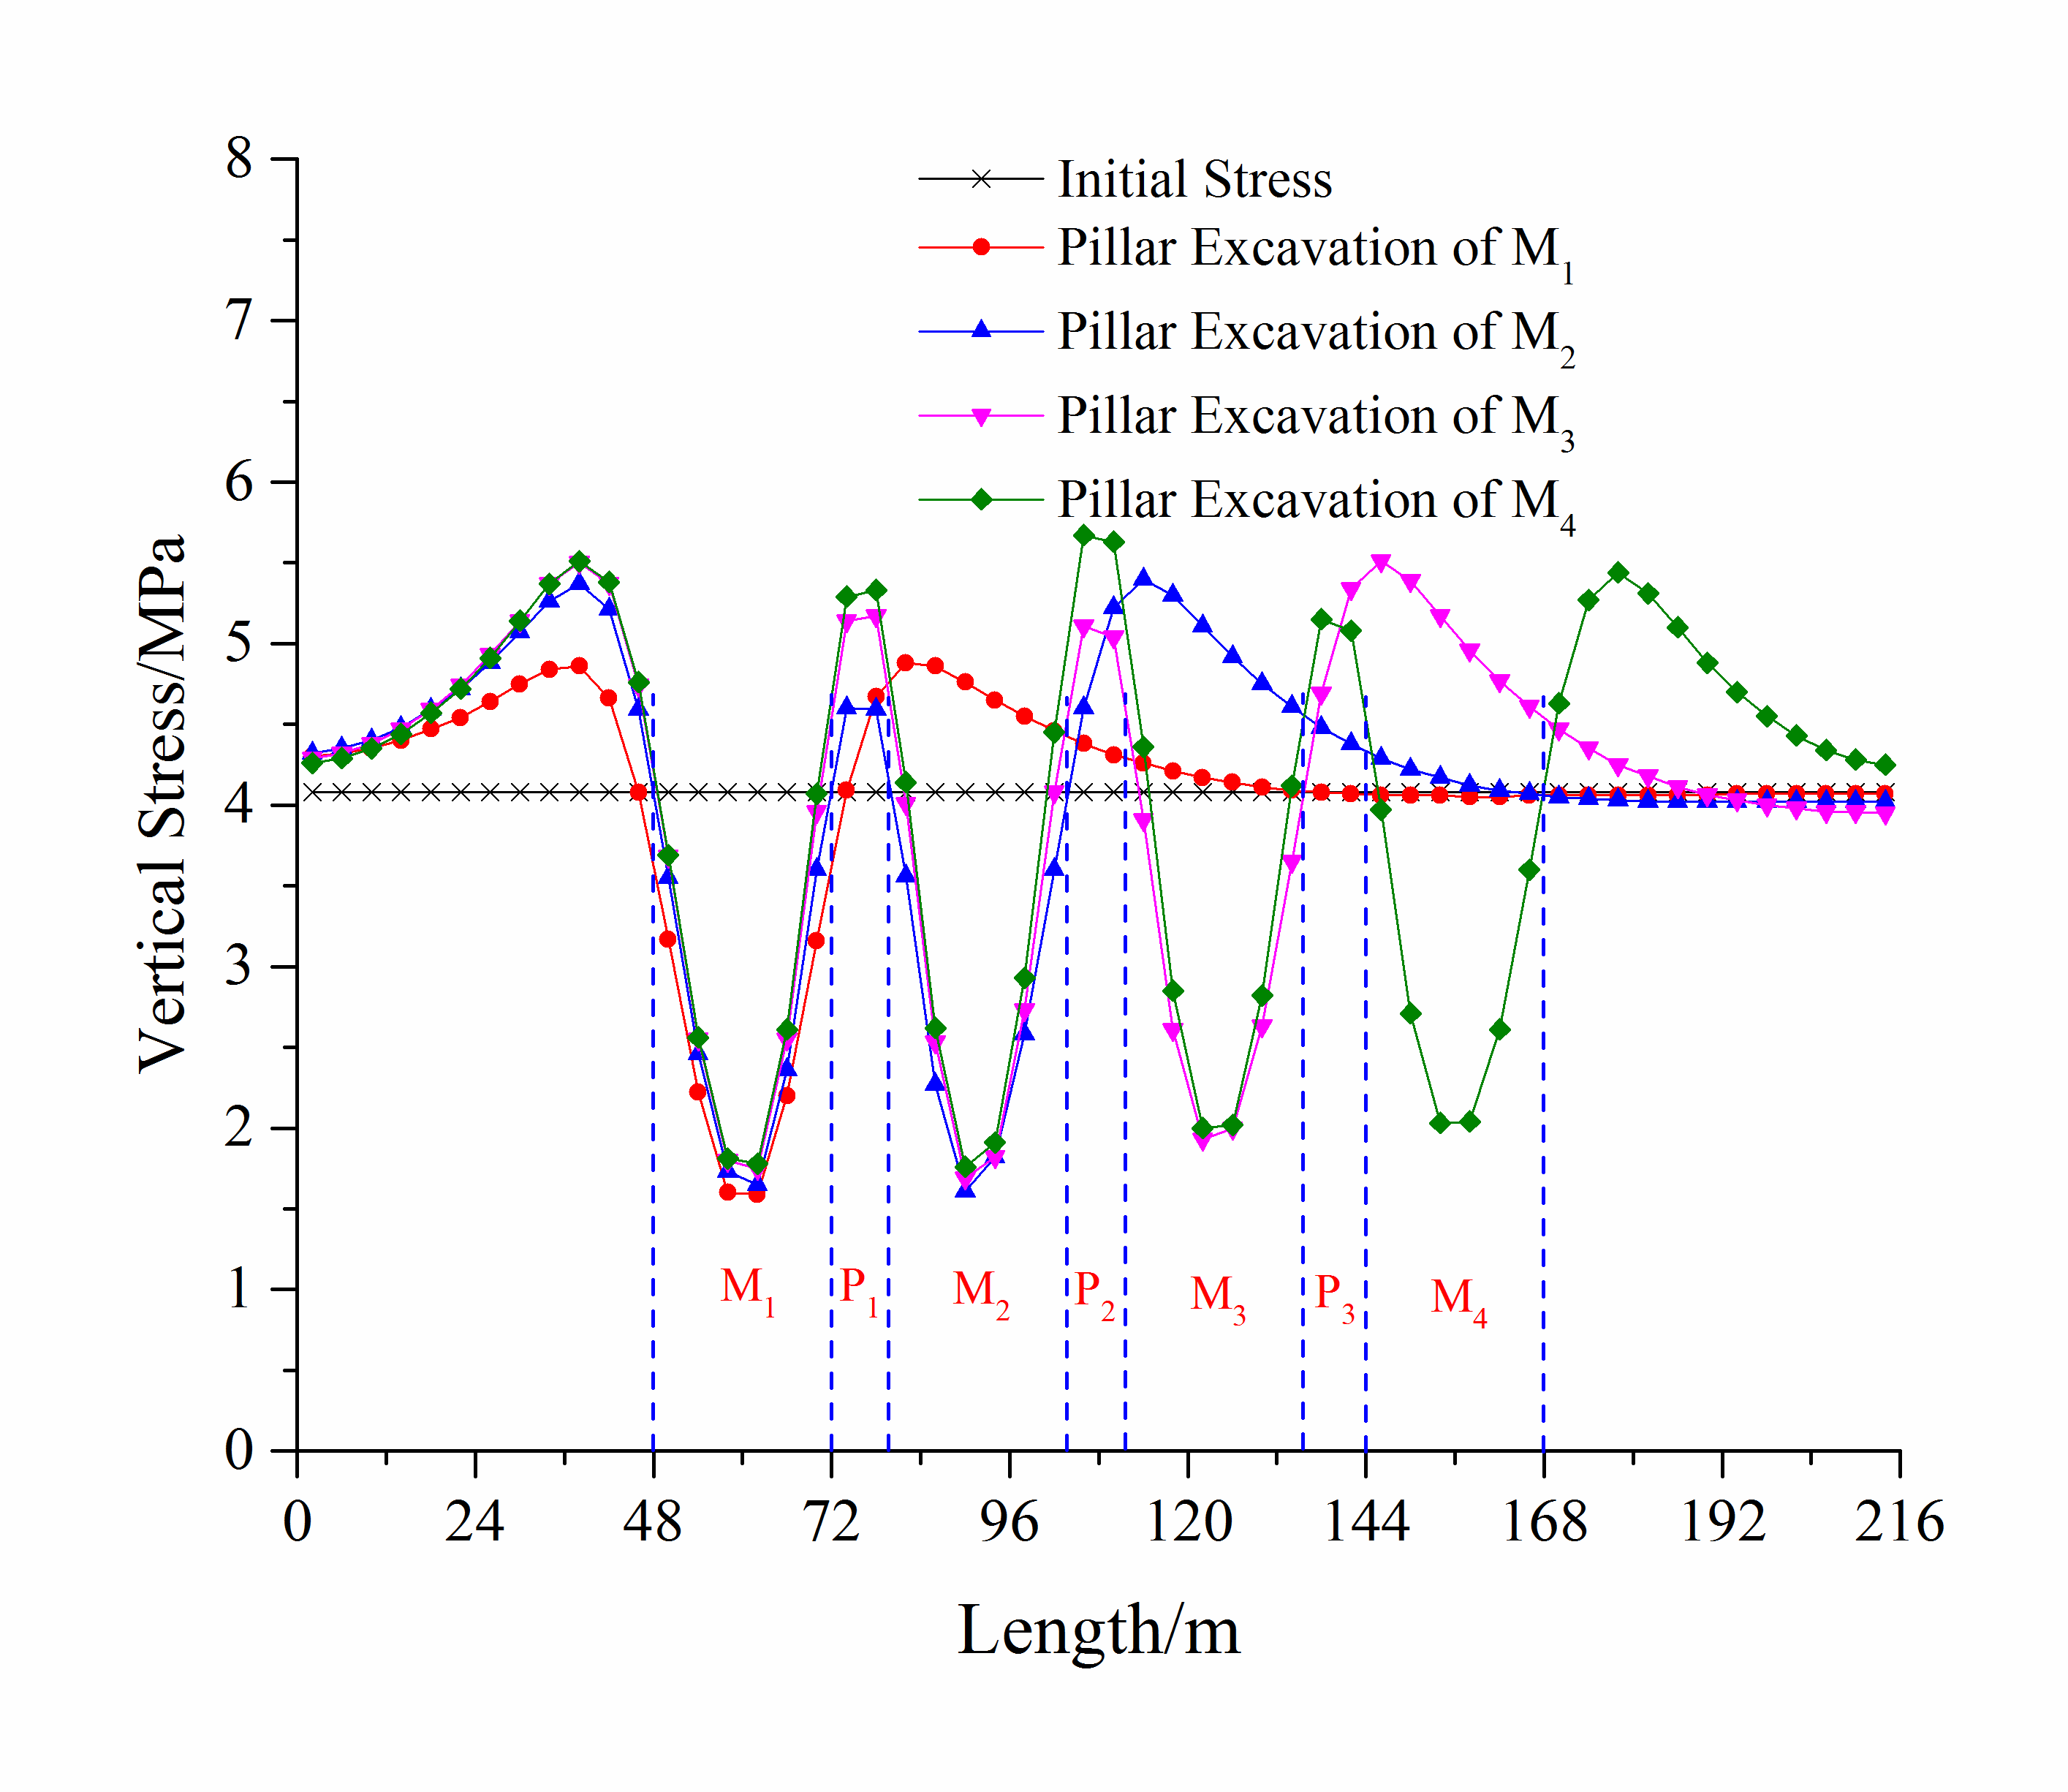  (**d**) |

**Figure 5.** Vertical stress evolution along strike length.(a) Vertical stress distribution after pillar excavation of M1, (b) Vertical stress distribution after pillar excavation of M2, (c) Vertical stress distribution after pillar excavation of M3 and (d) Vertical stress distribution after pillar excavation of M4.

| 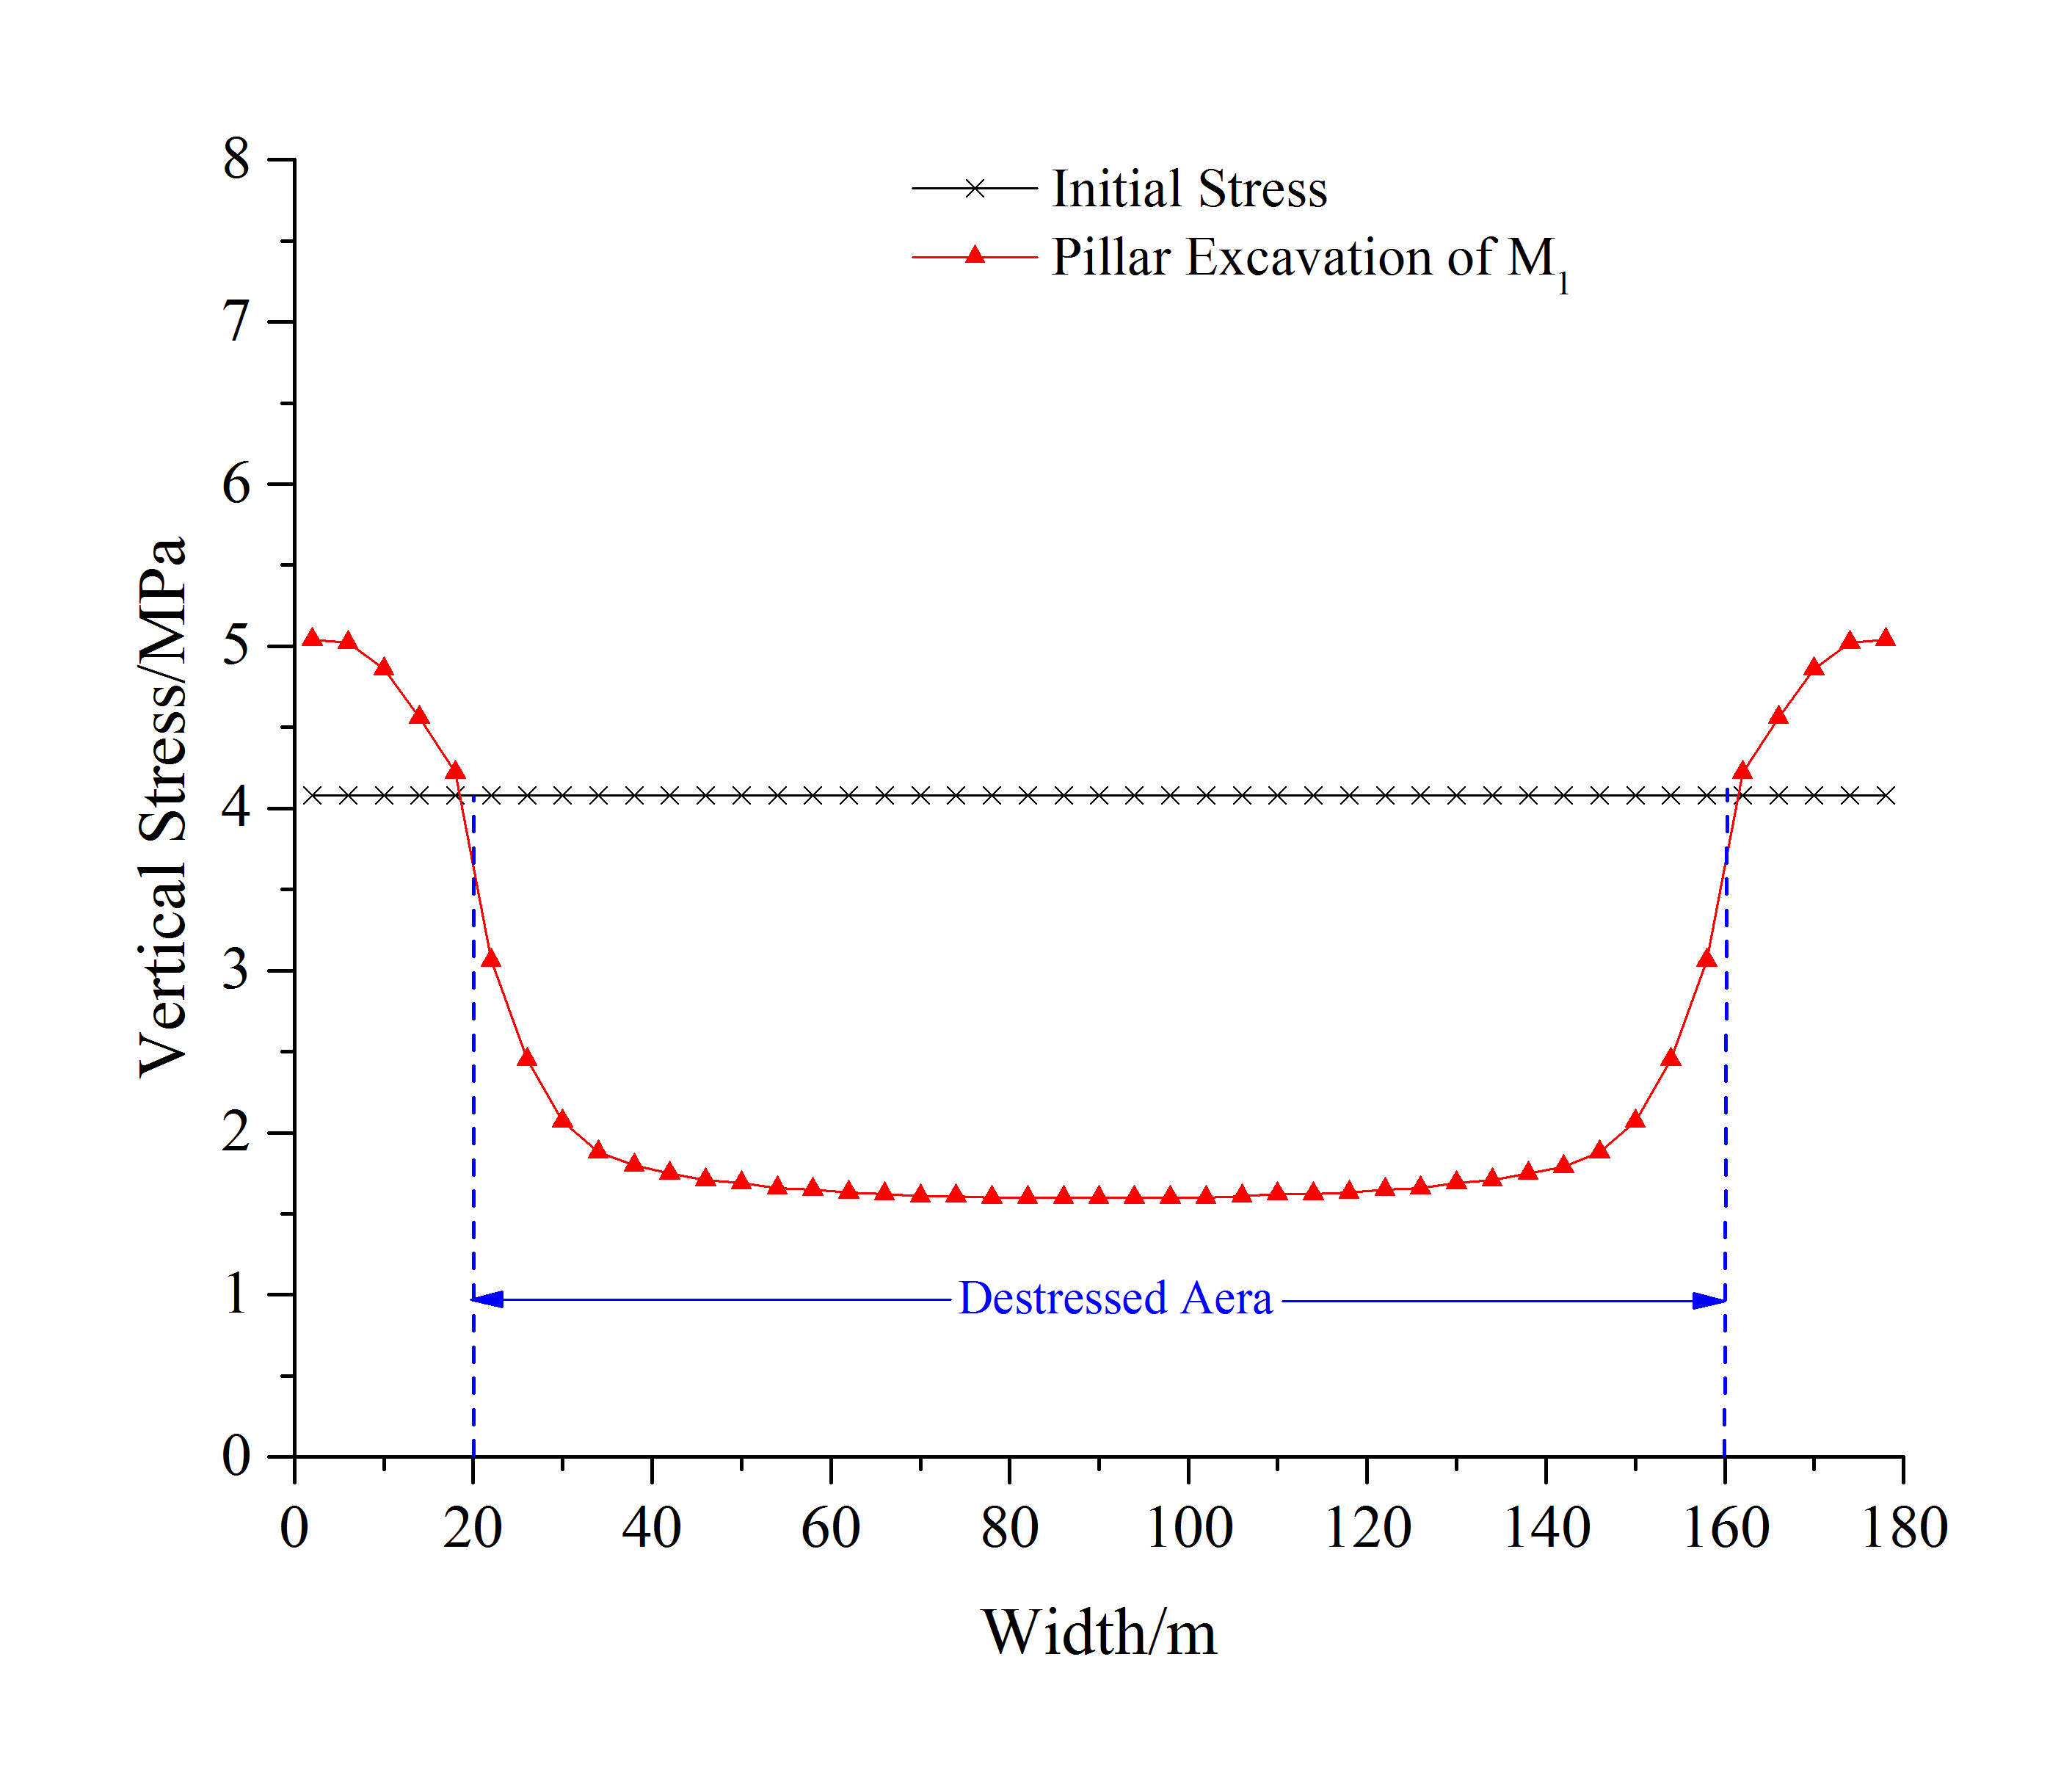 (**a**) | 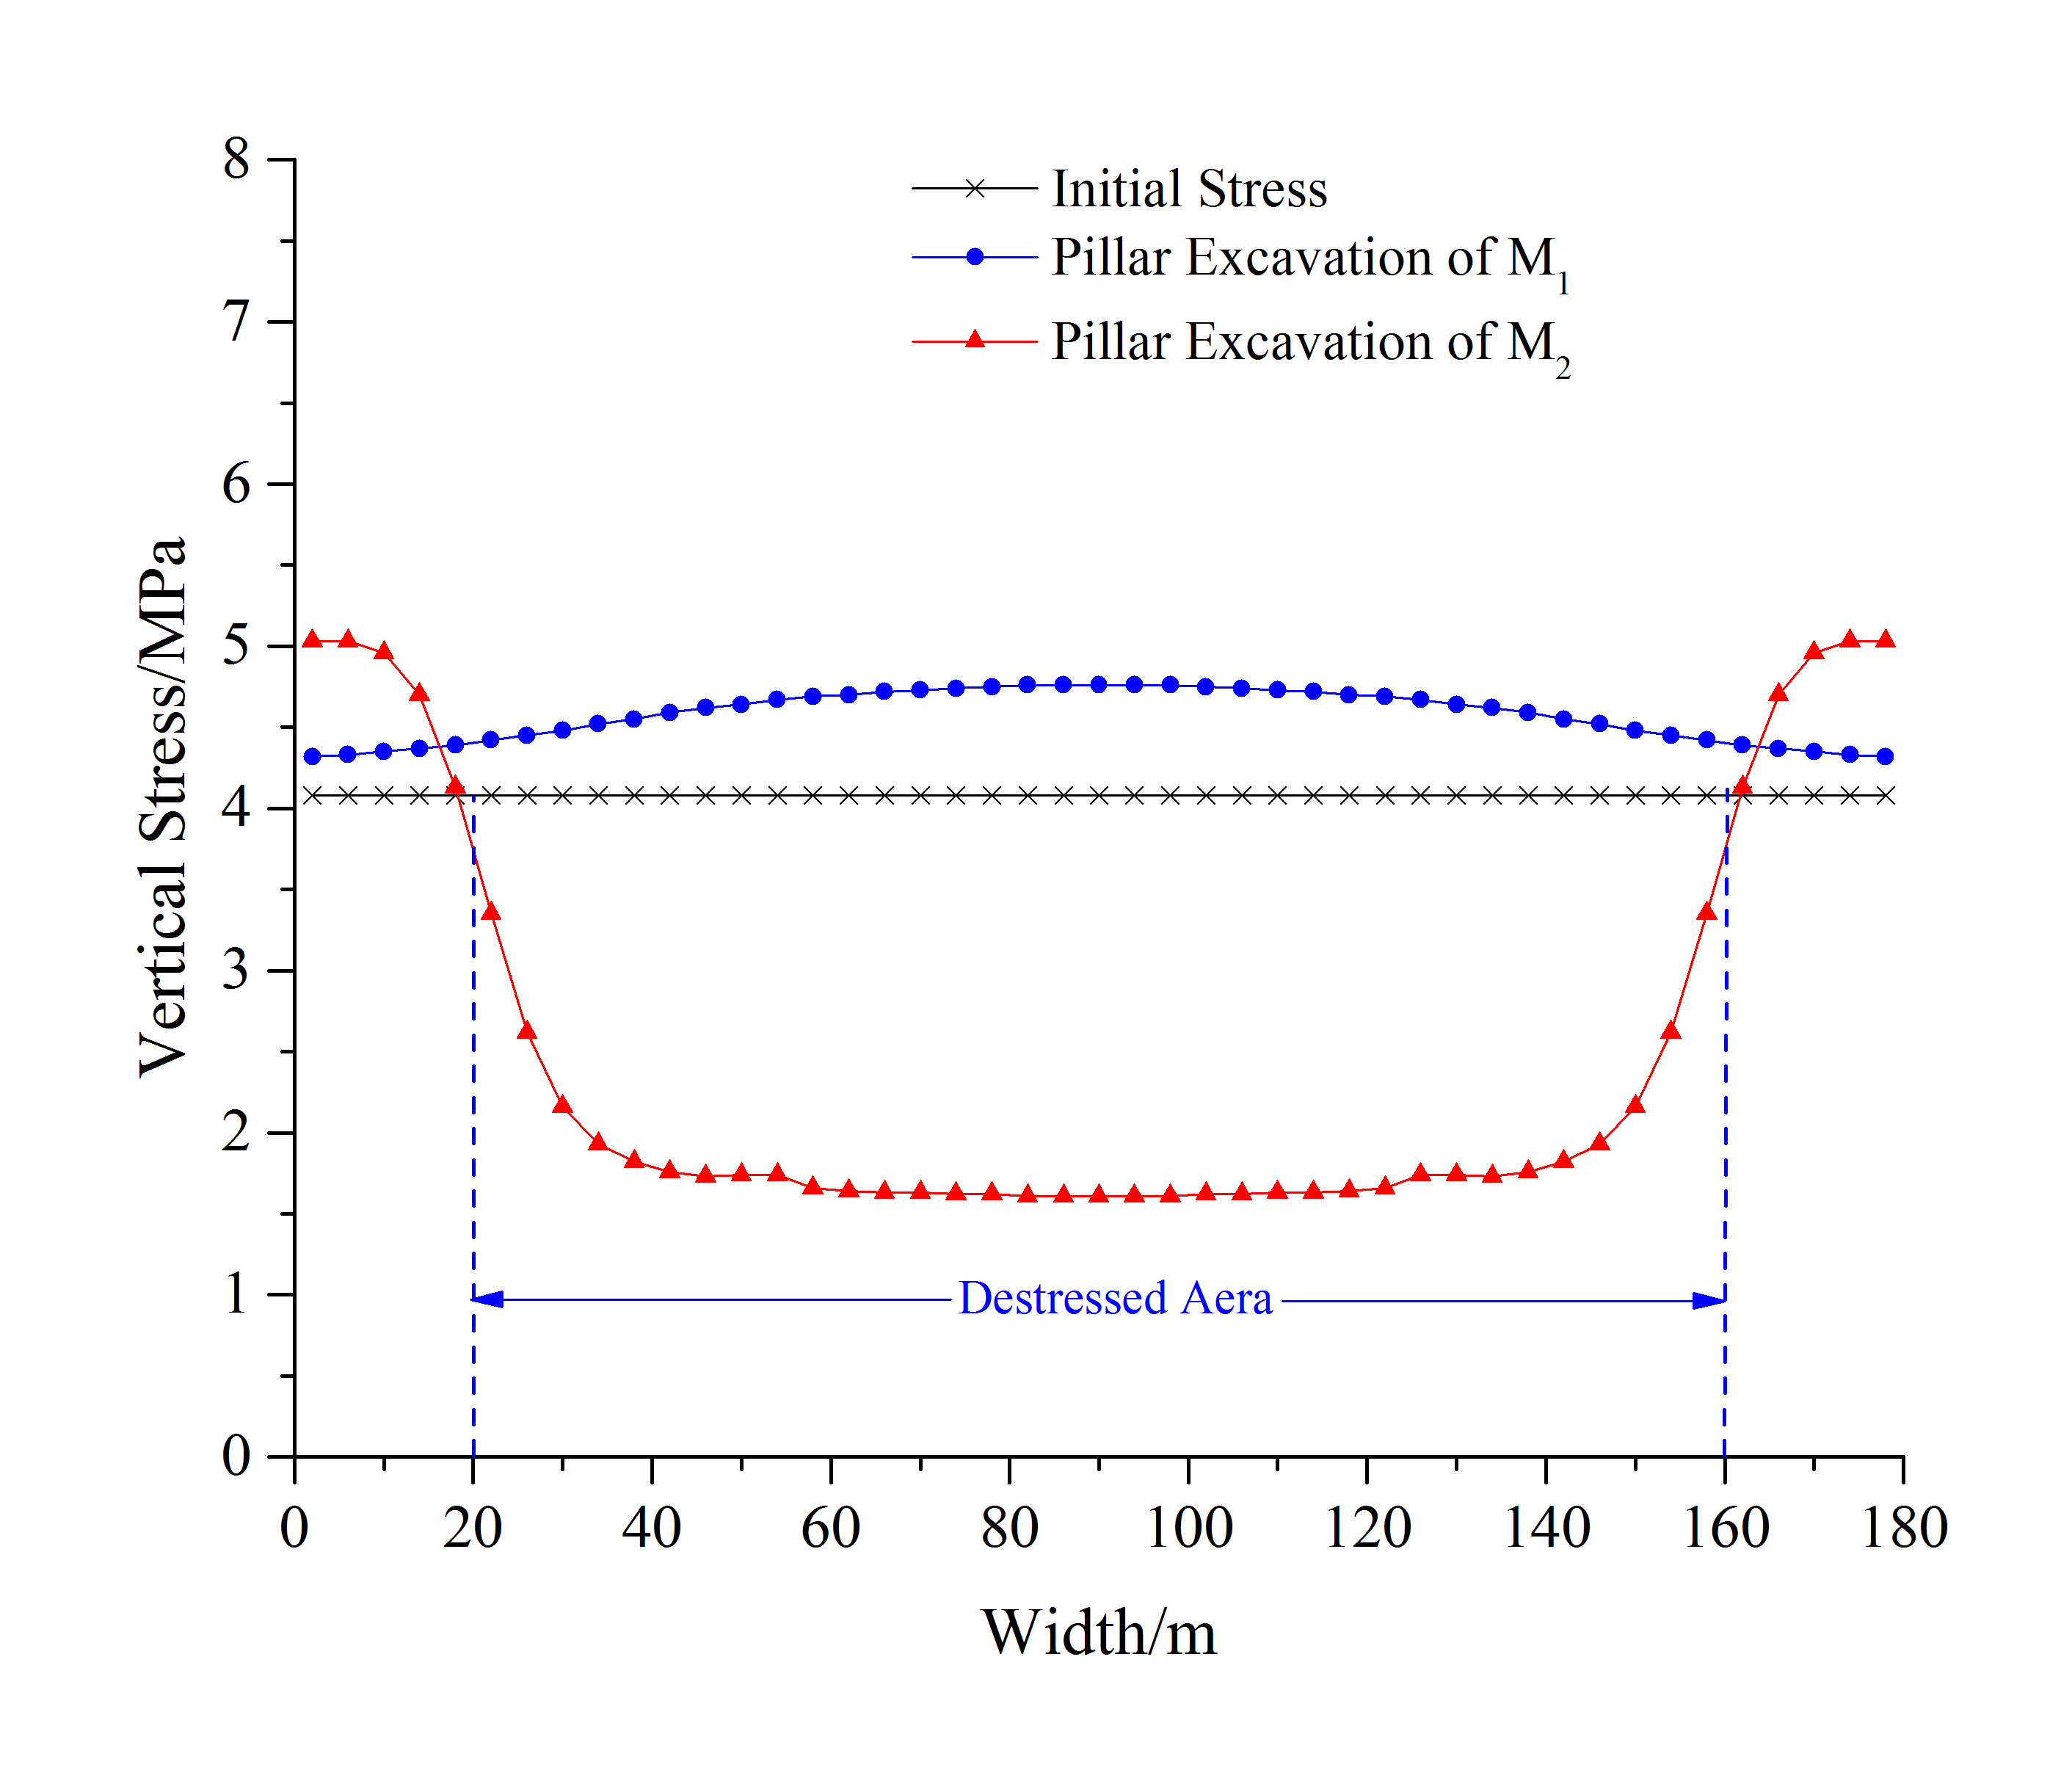  (**b**) |
| --- | --- |
| 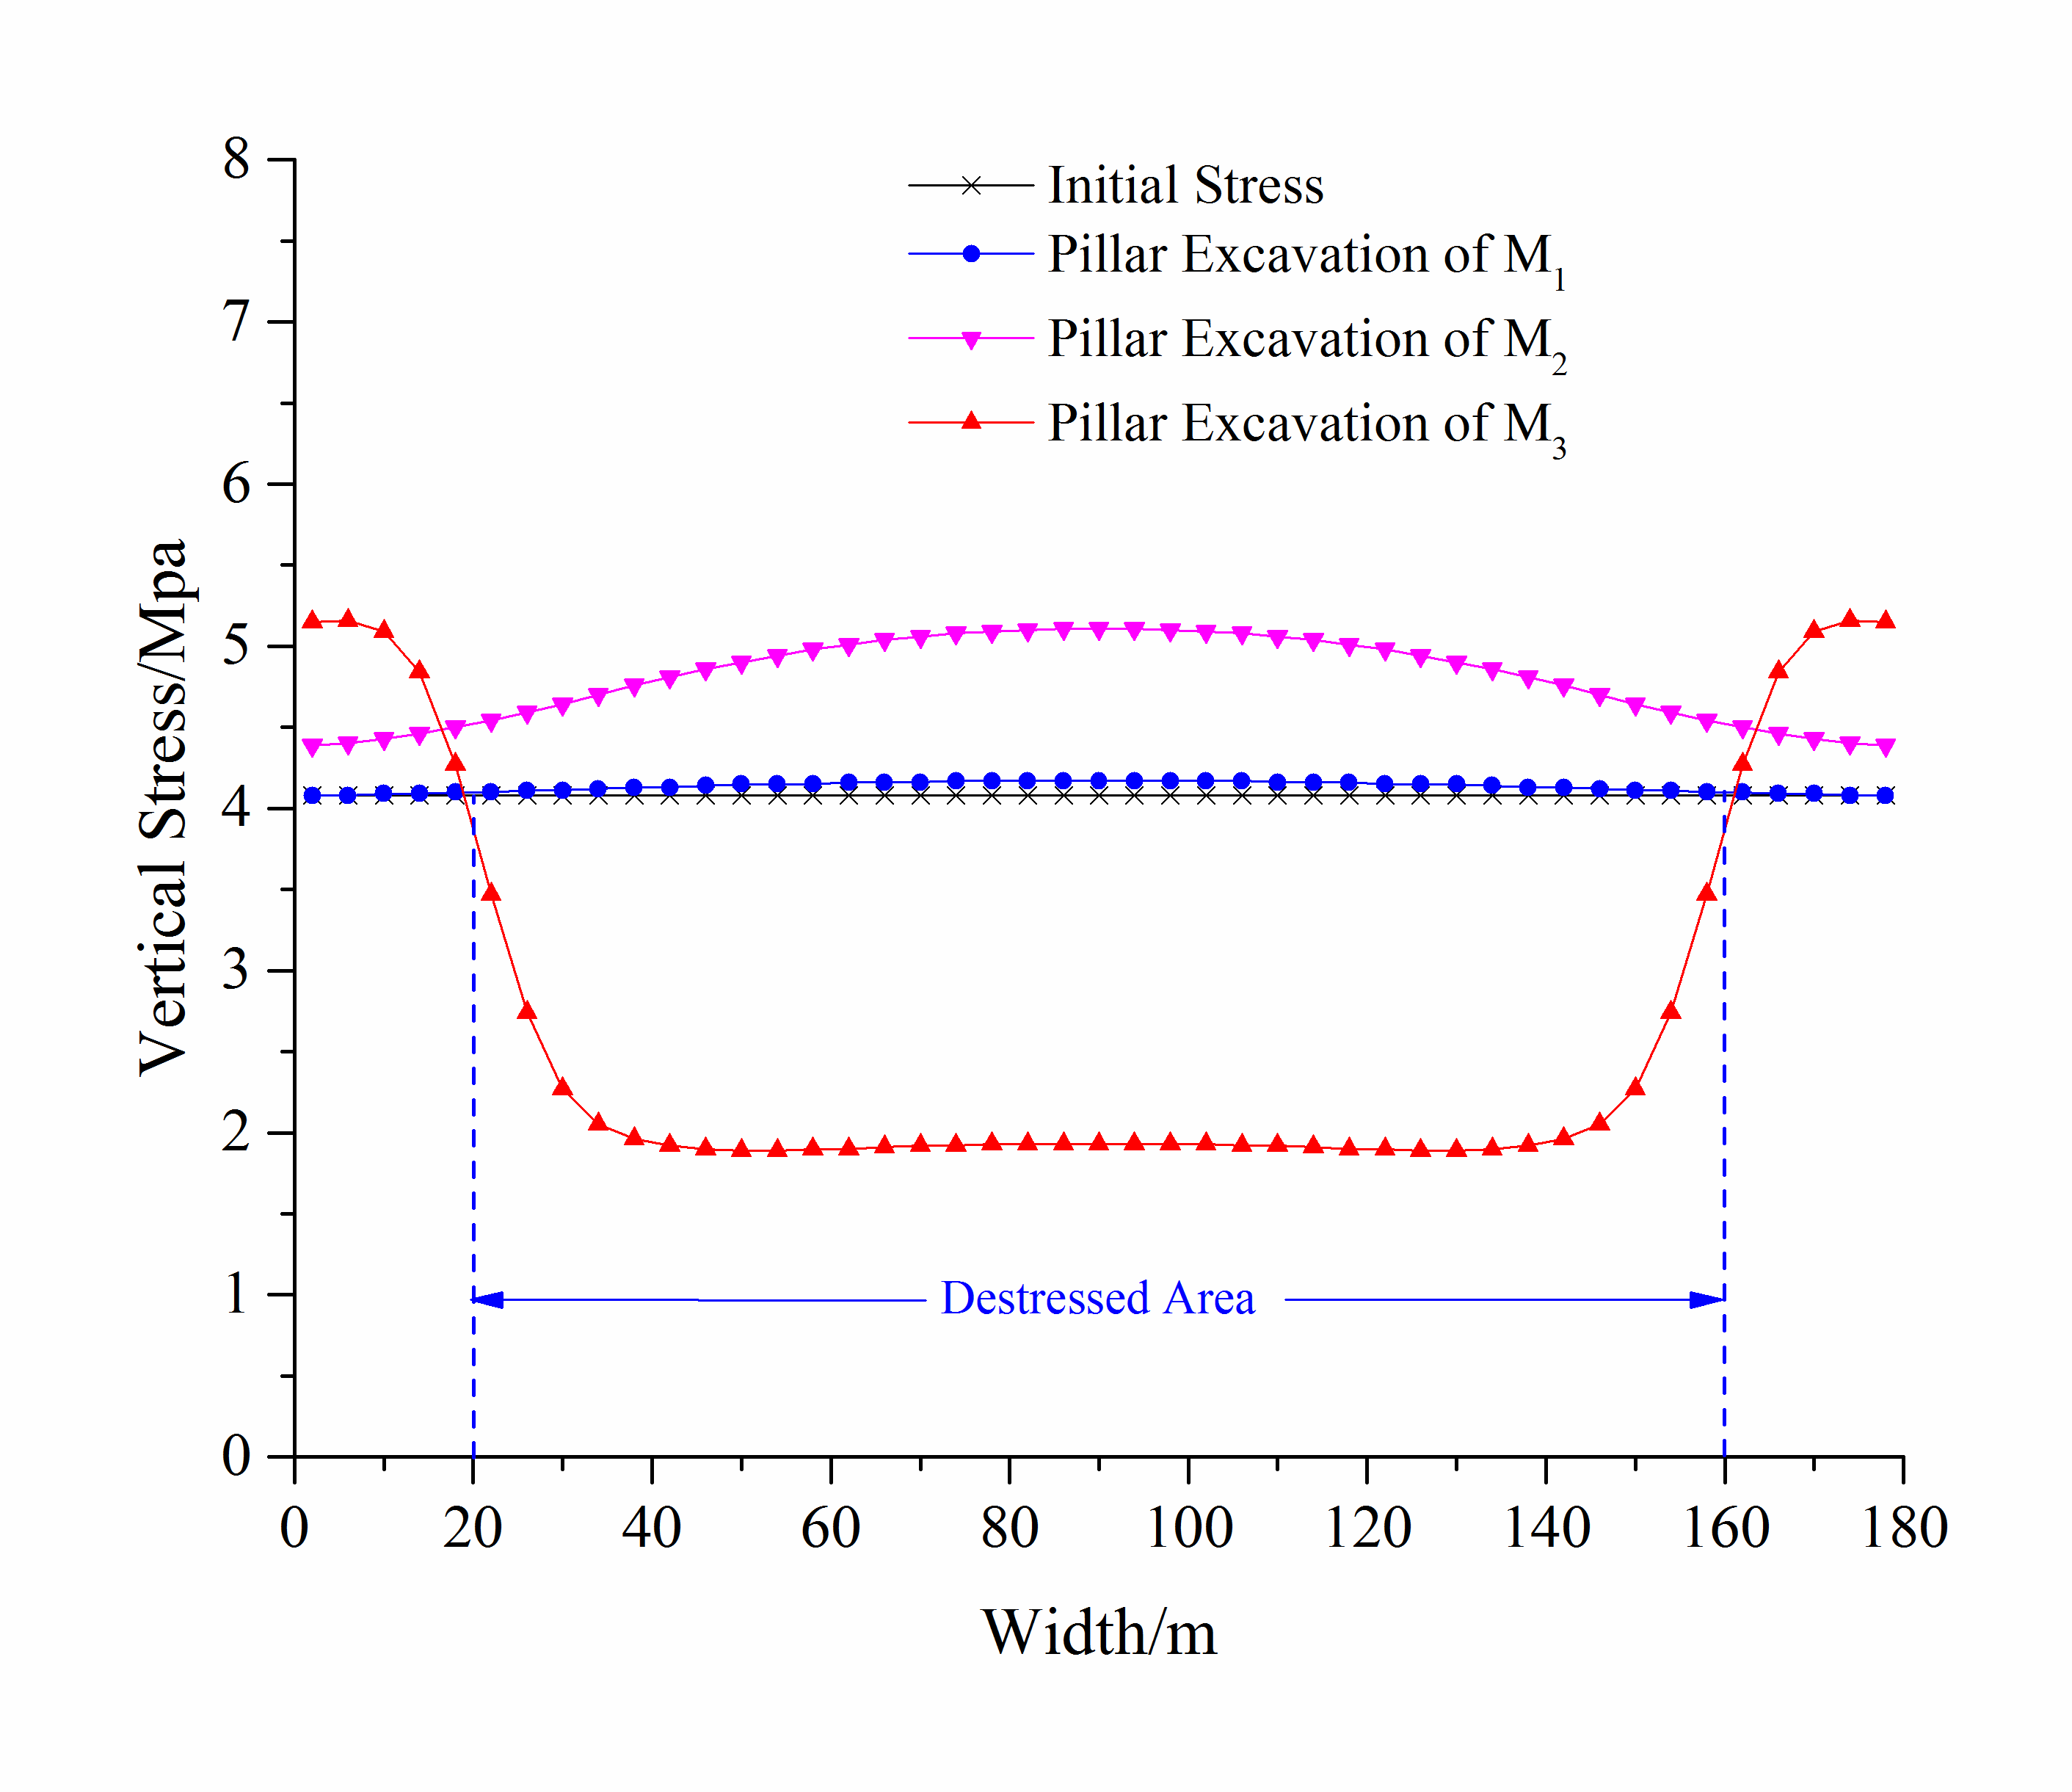  (**c**) | 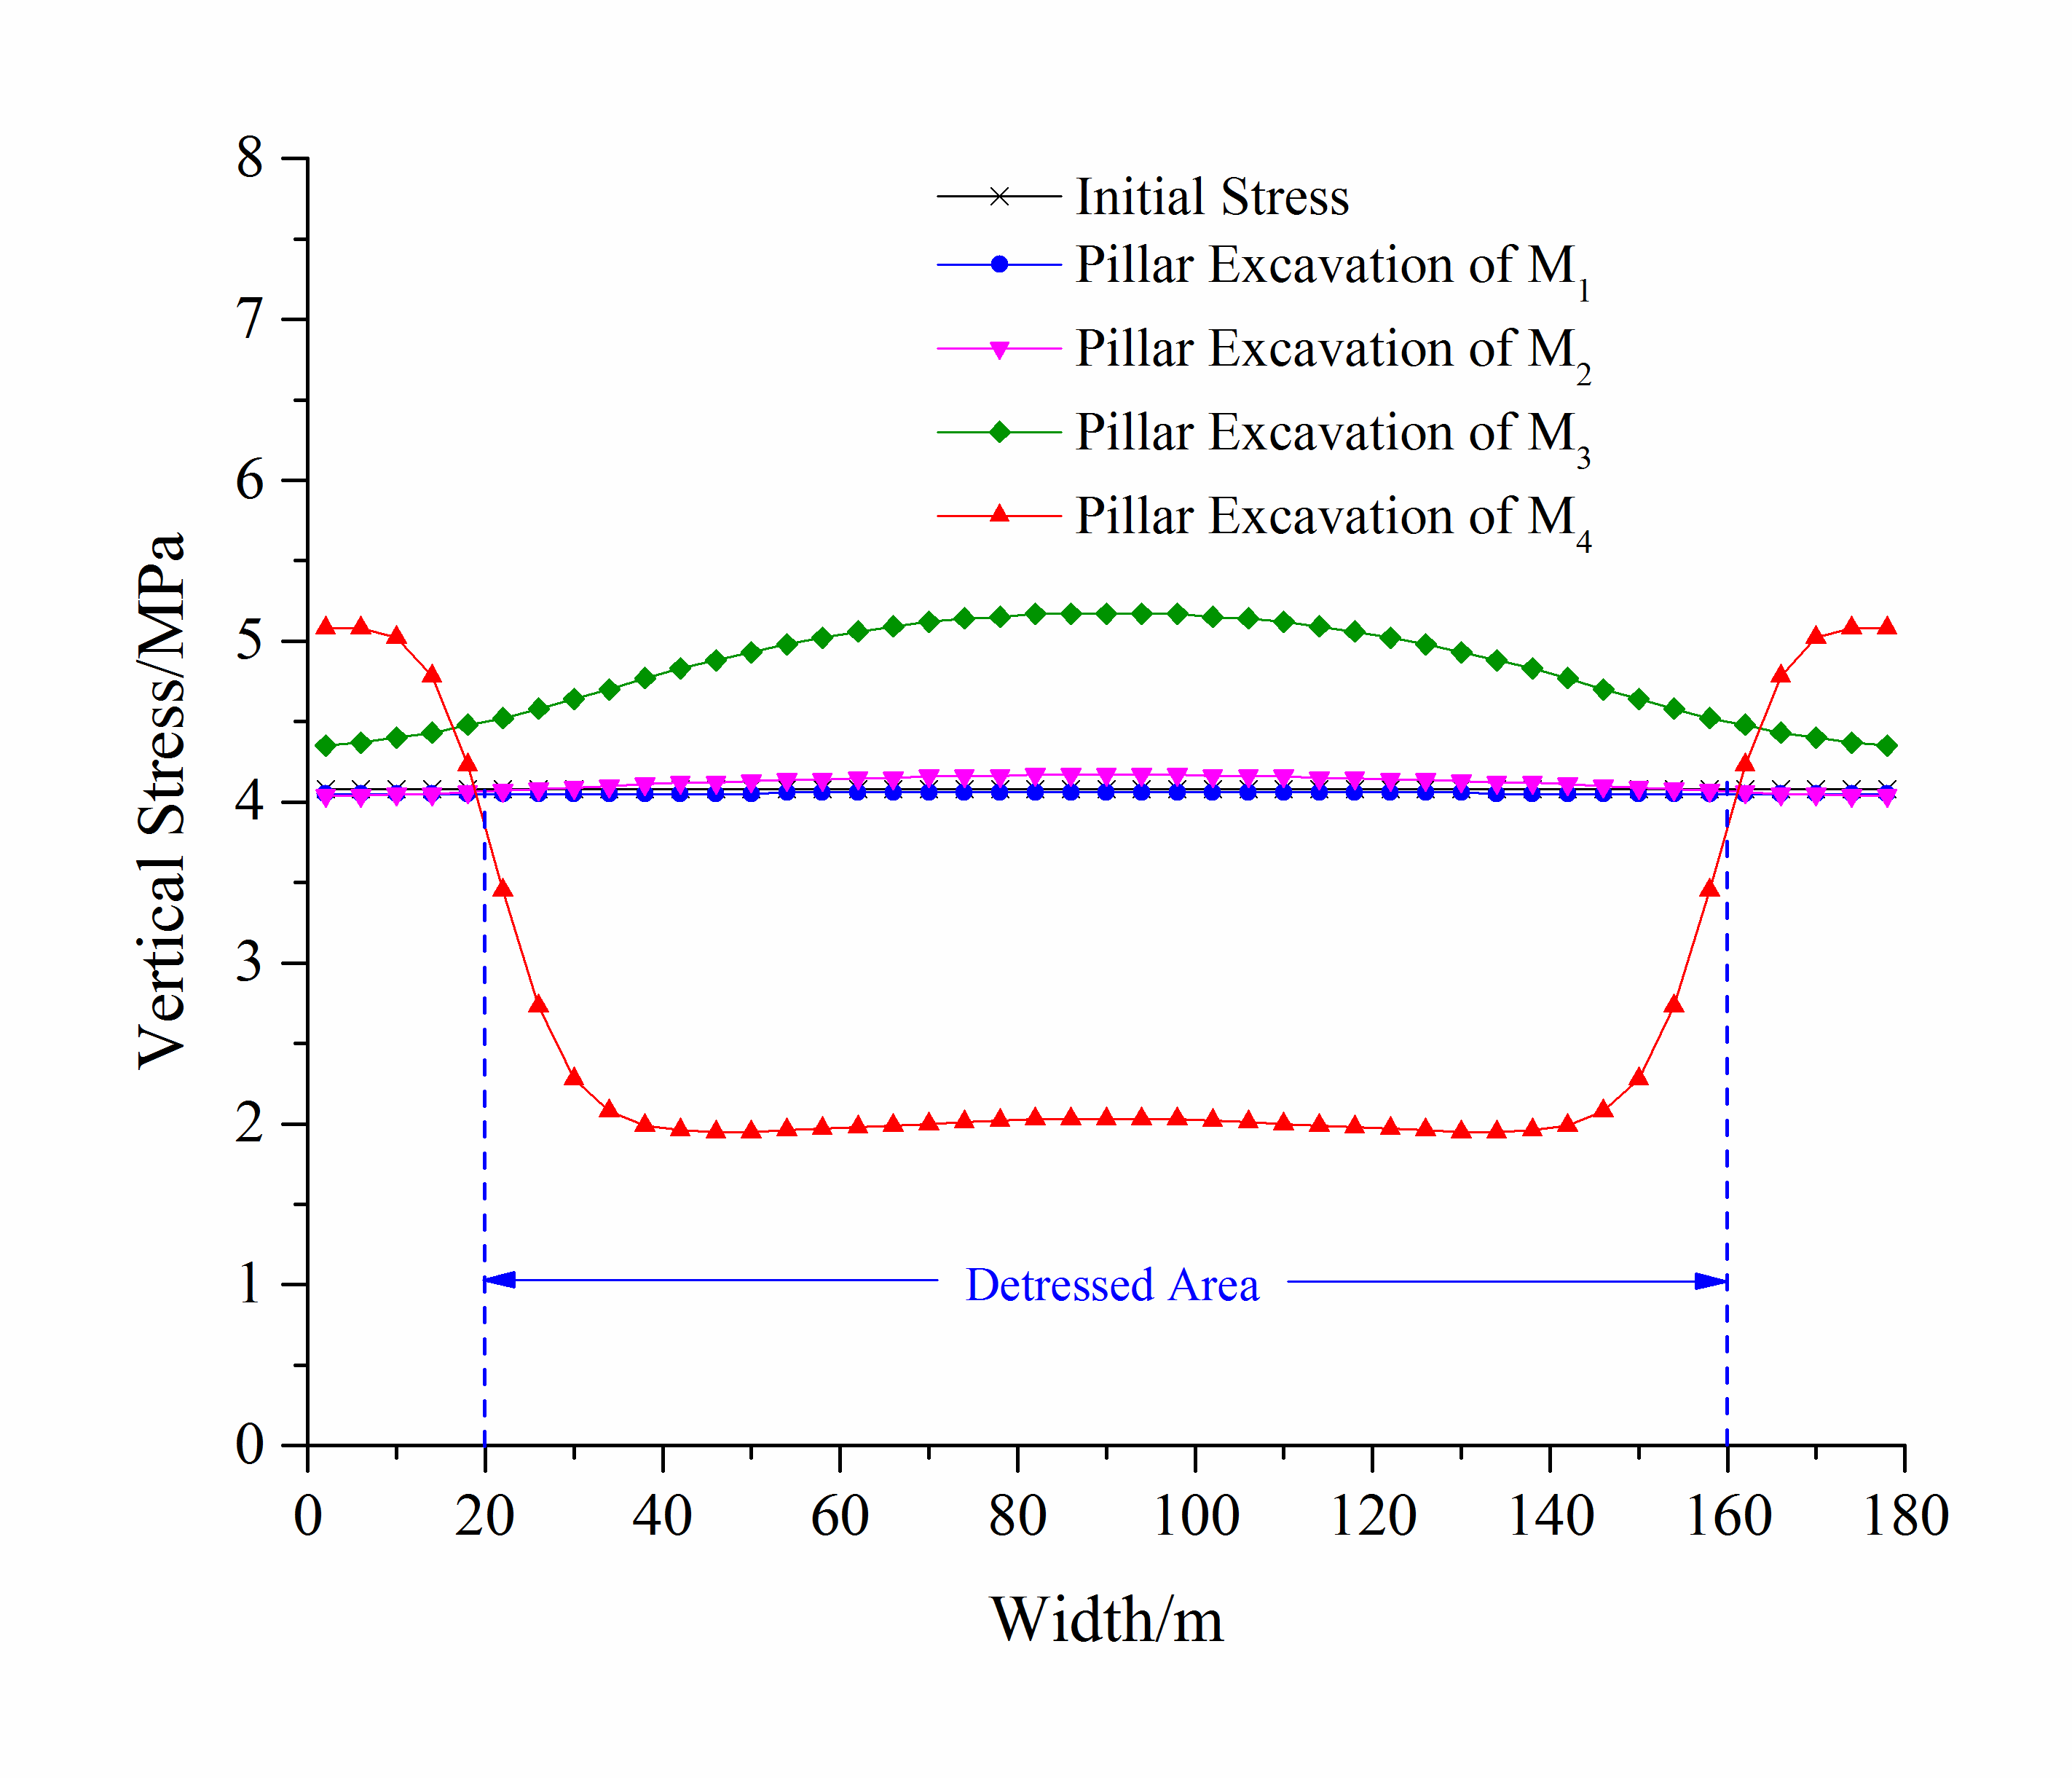  (**d**) |

**Figure 6.** Vertical stress evolution along dip width.(a) Vertical stress distribution along Line 2, (b) Vertical stress distribution along Line 3, (c) Vertical stress distribution along Line 4 and (d) Vertical stress distribution along Line 5.

| **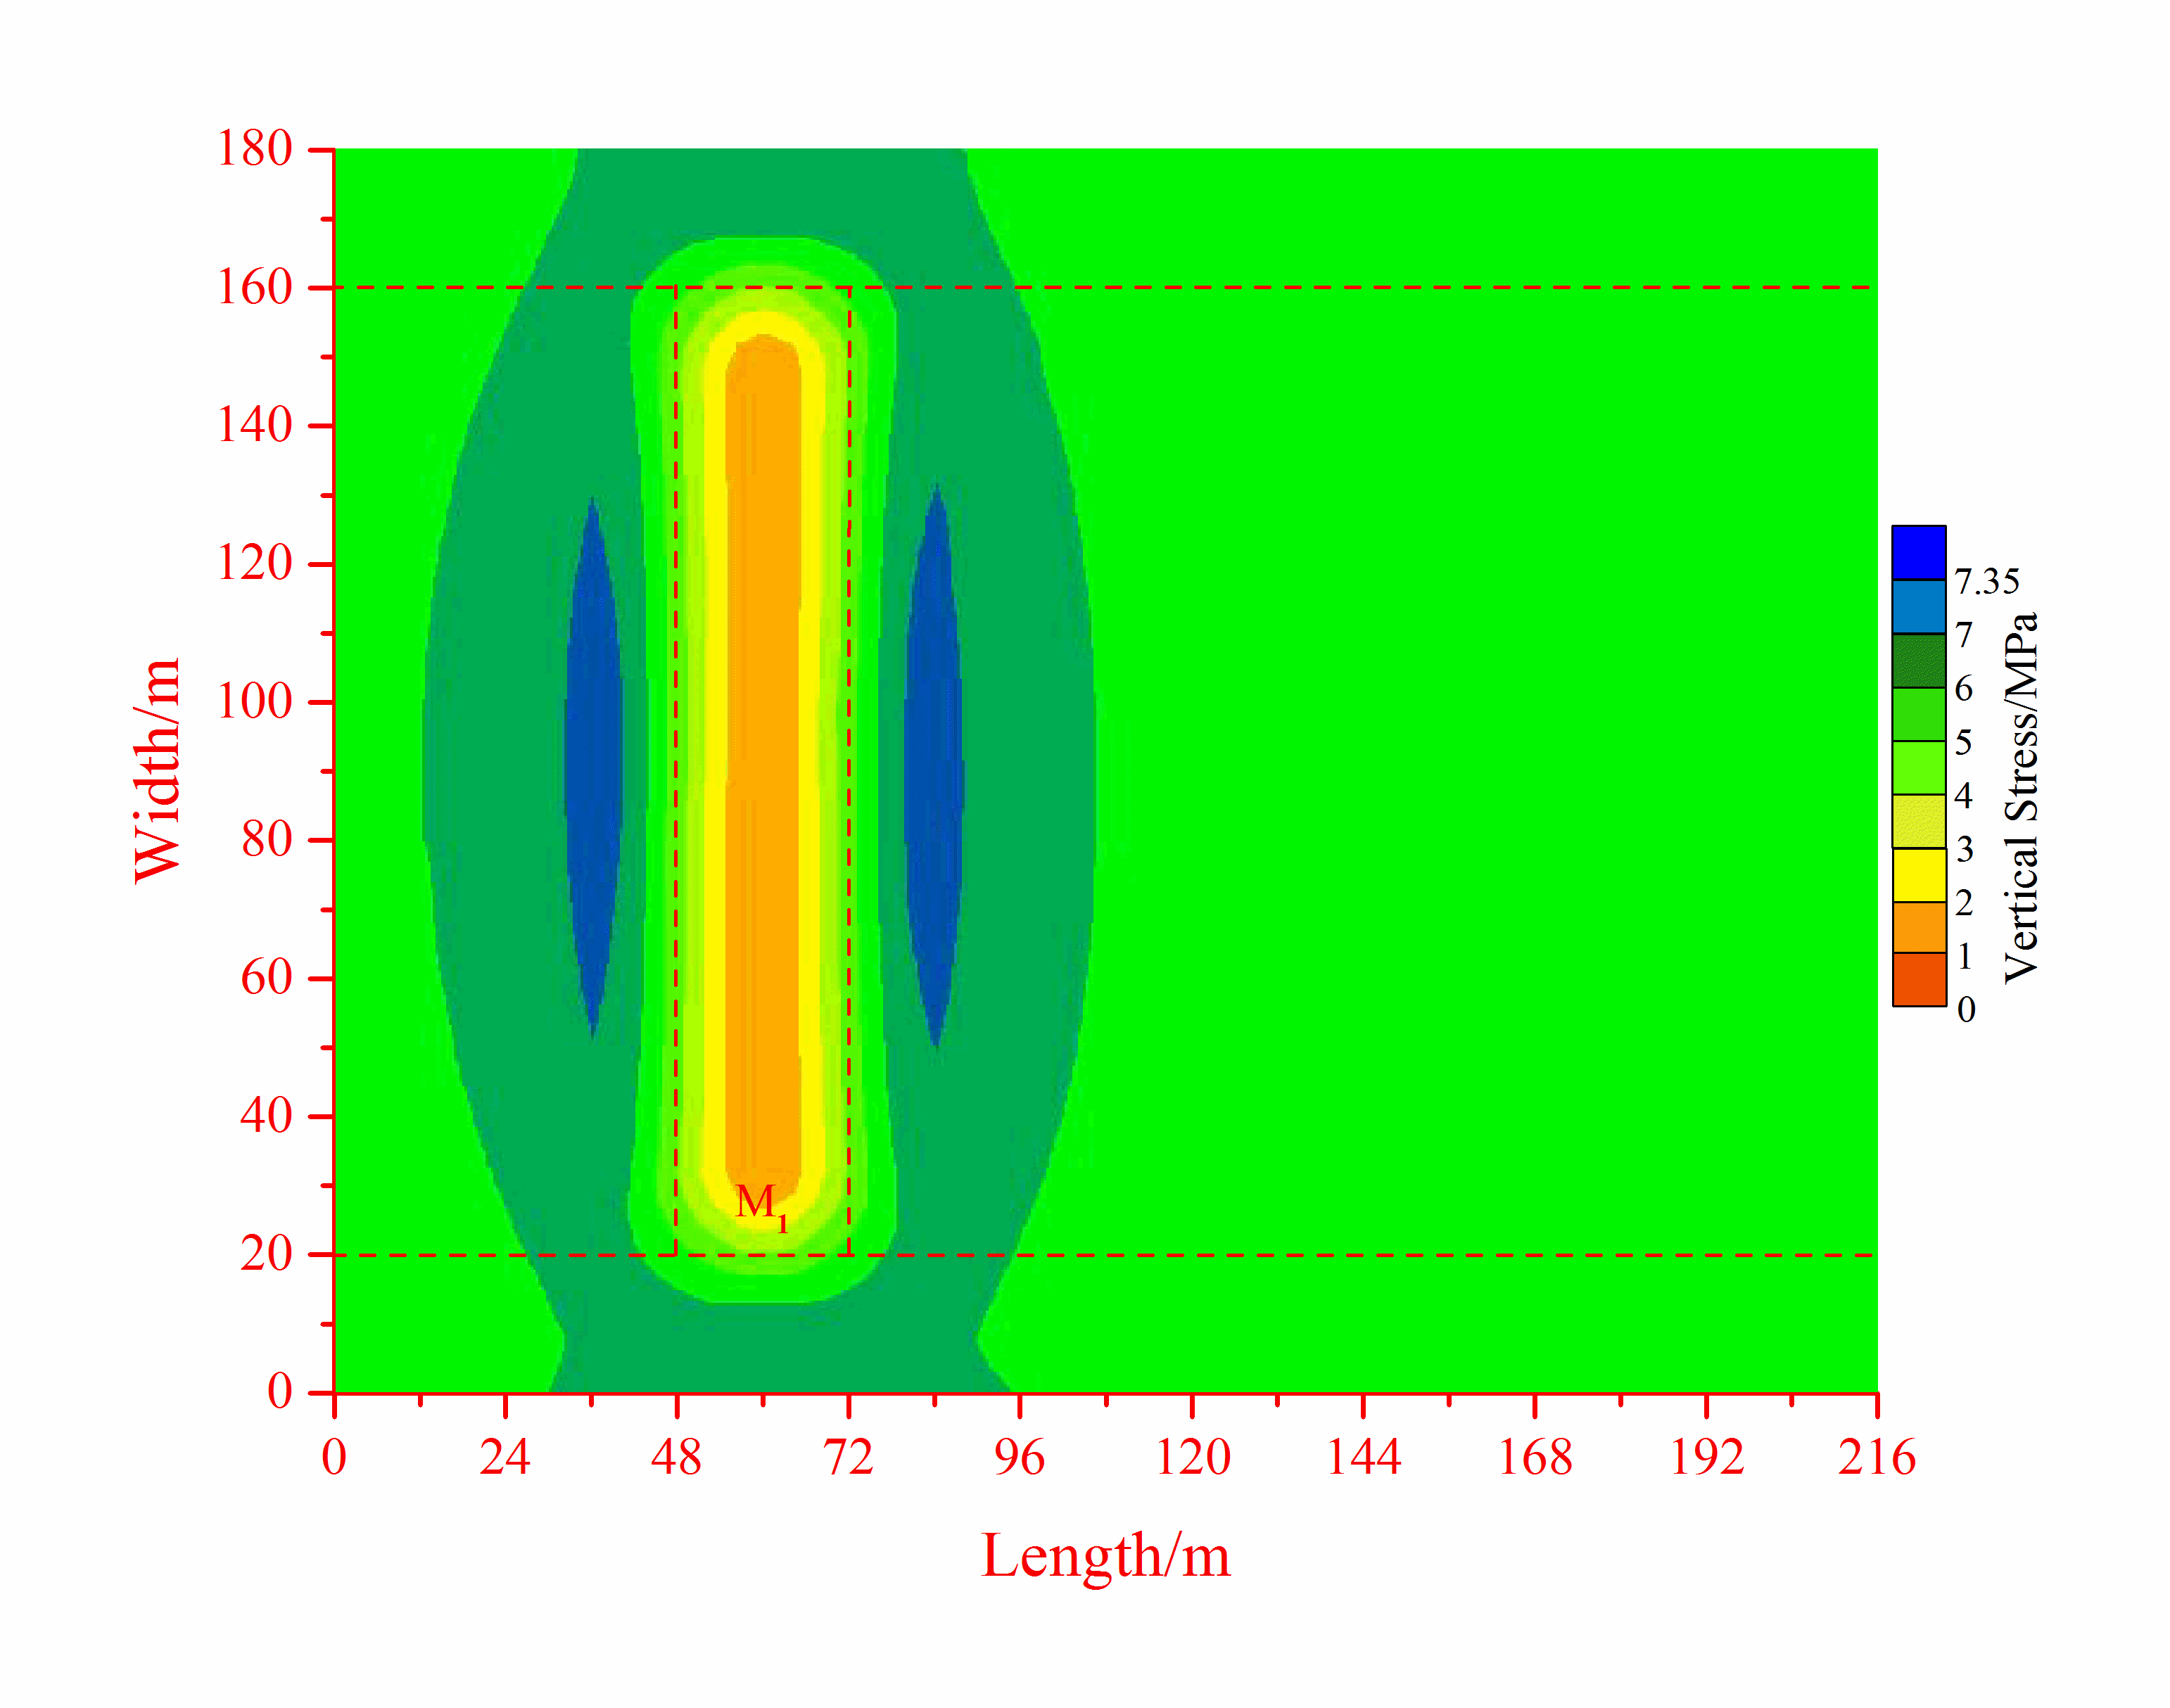** (**a**) | **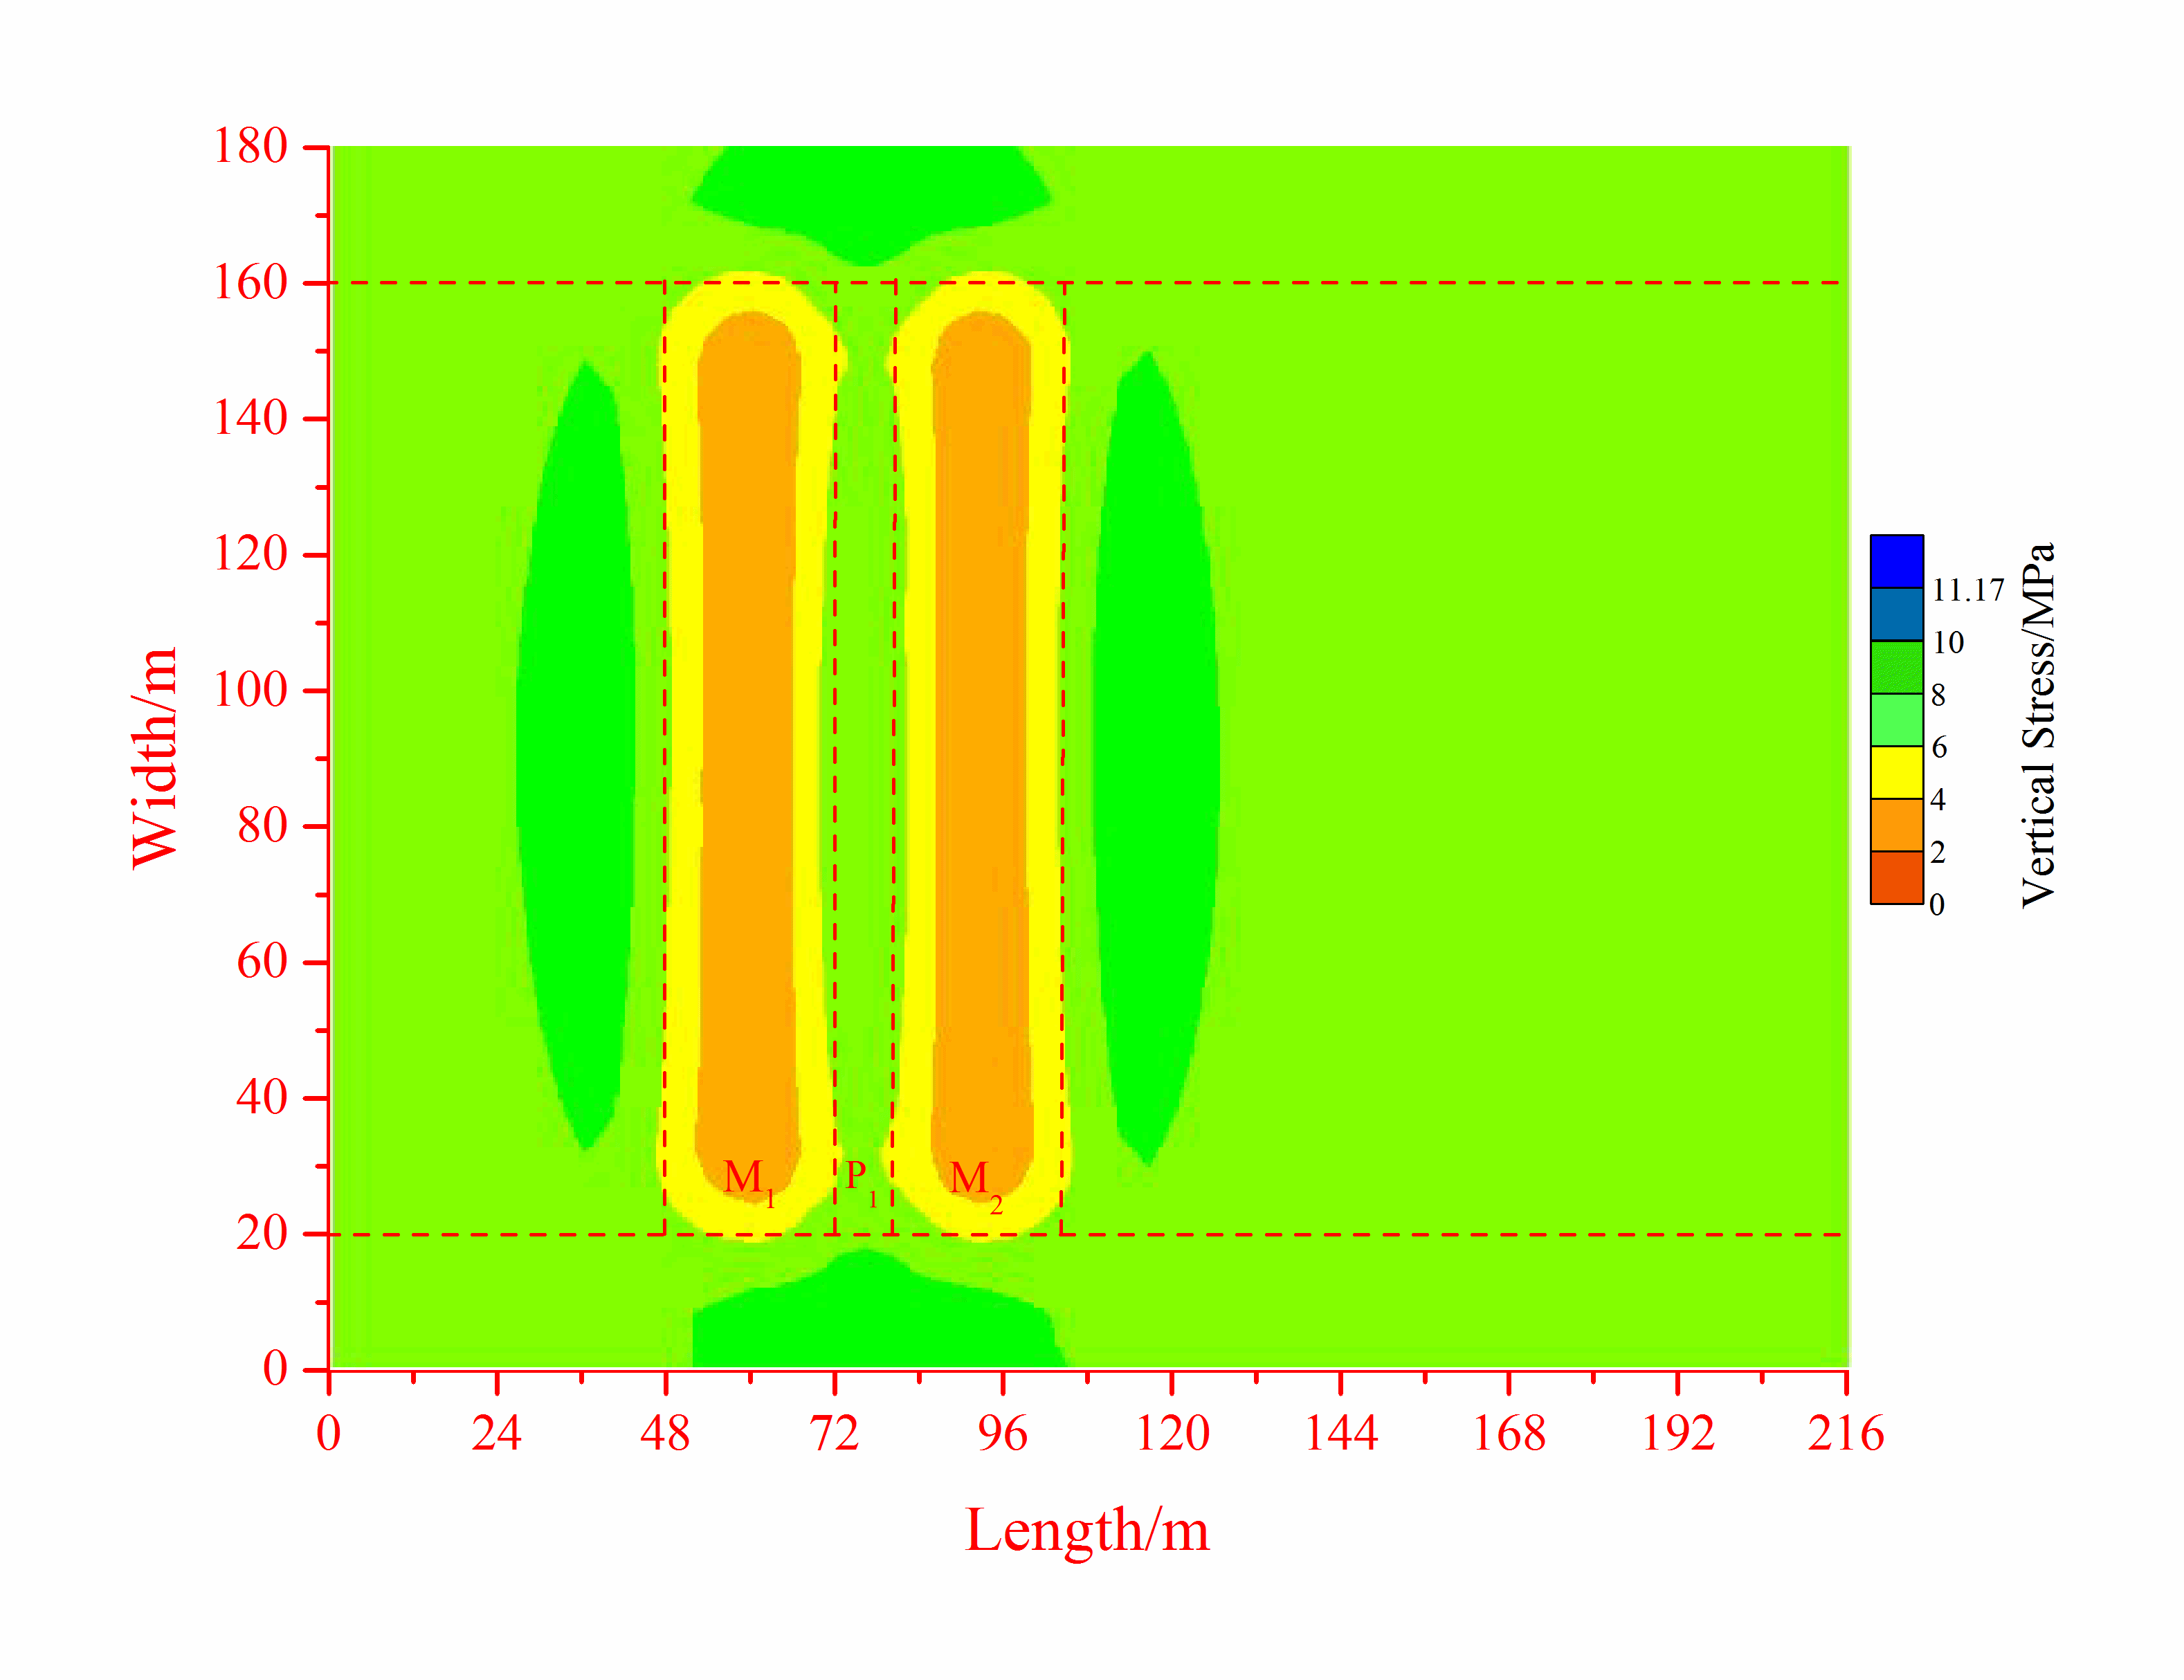**  (**b**) |
| --- | --- |
| **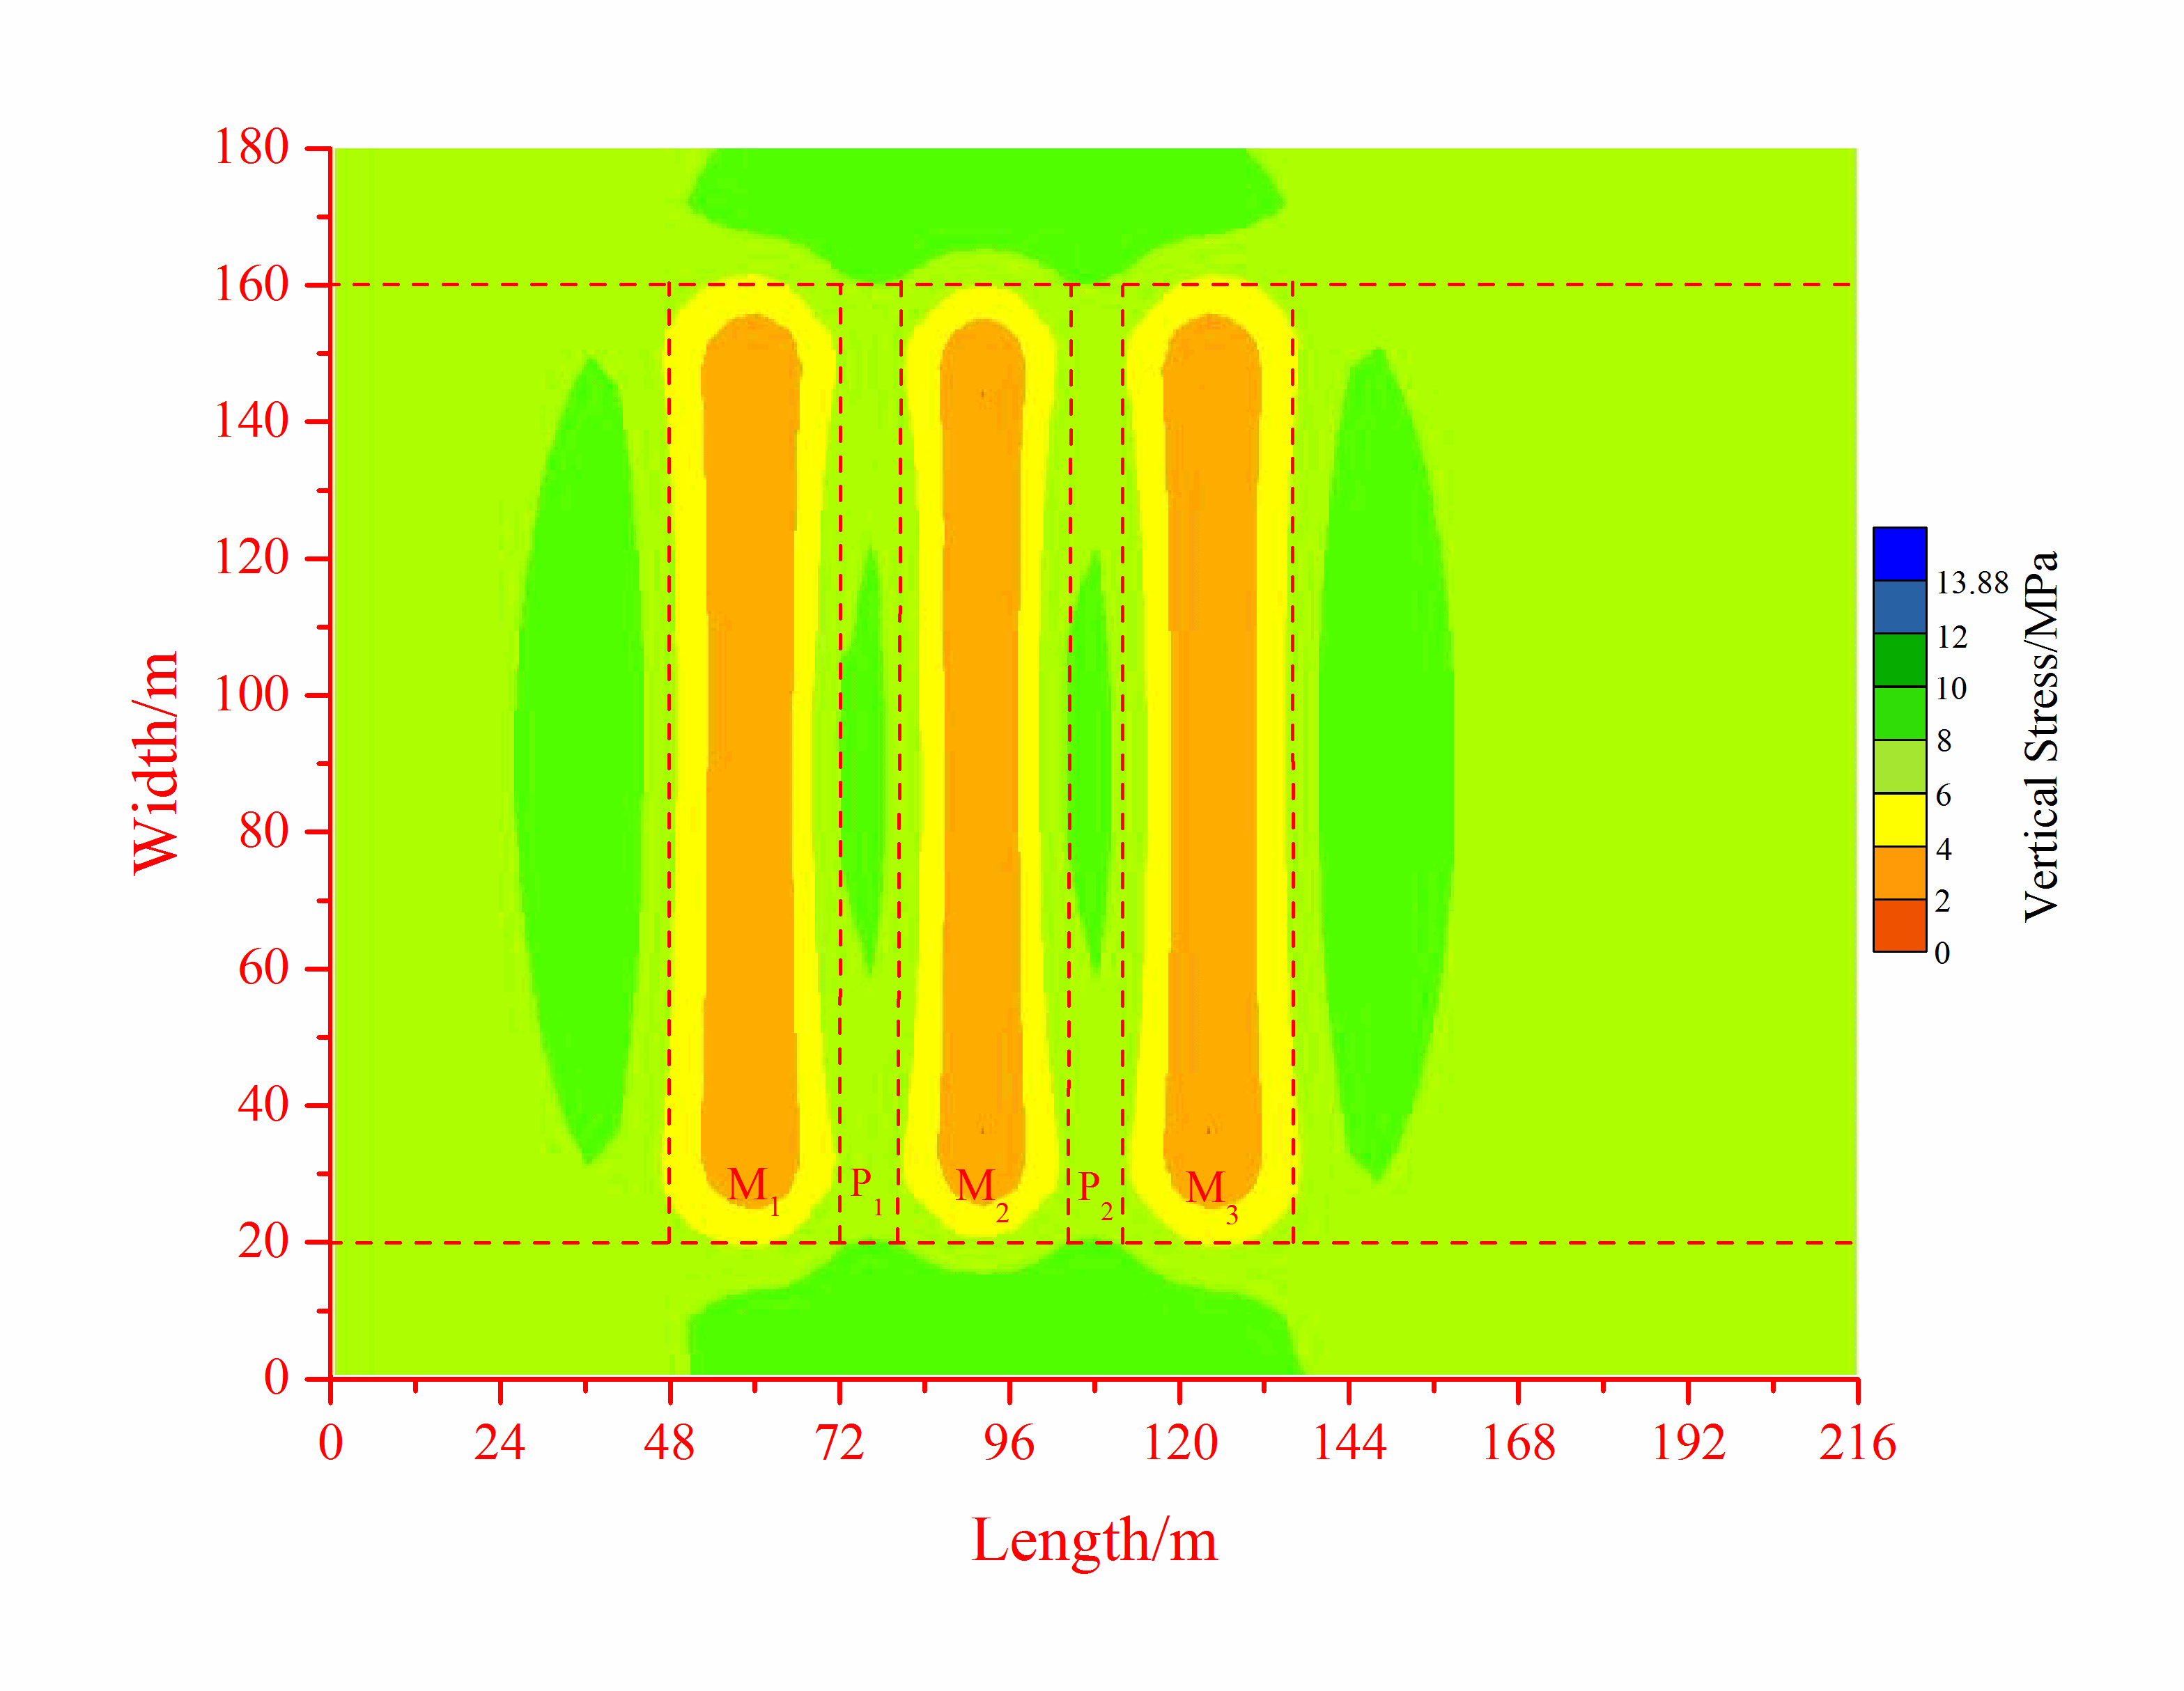** (**c**) | **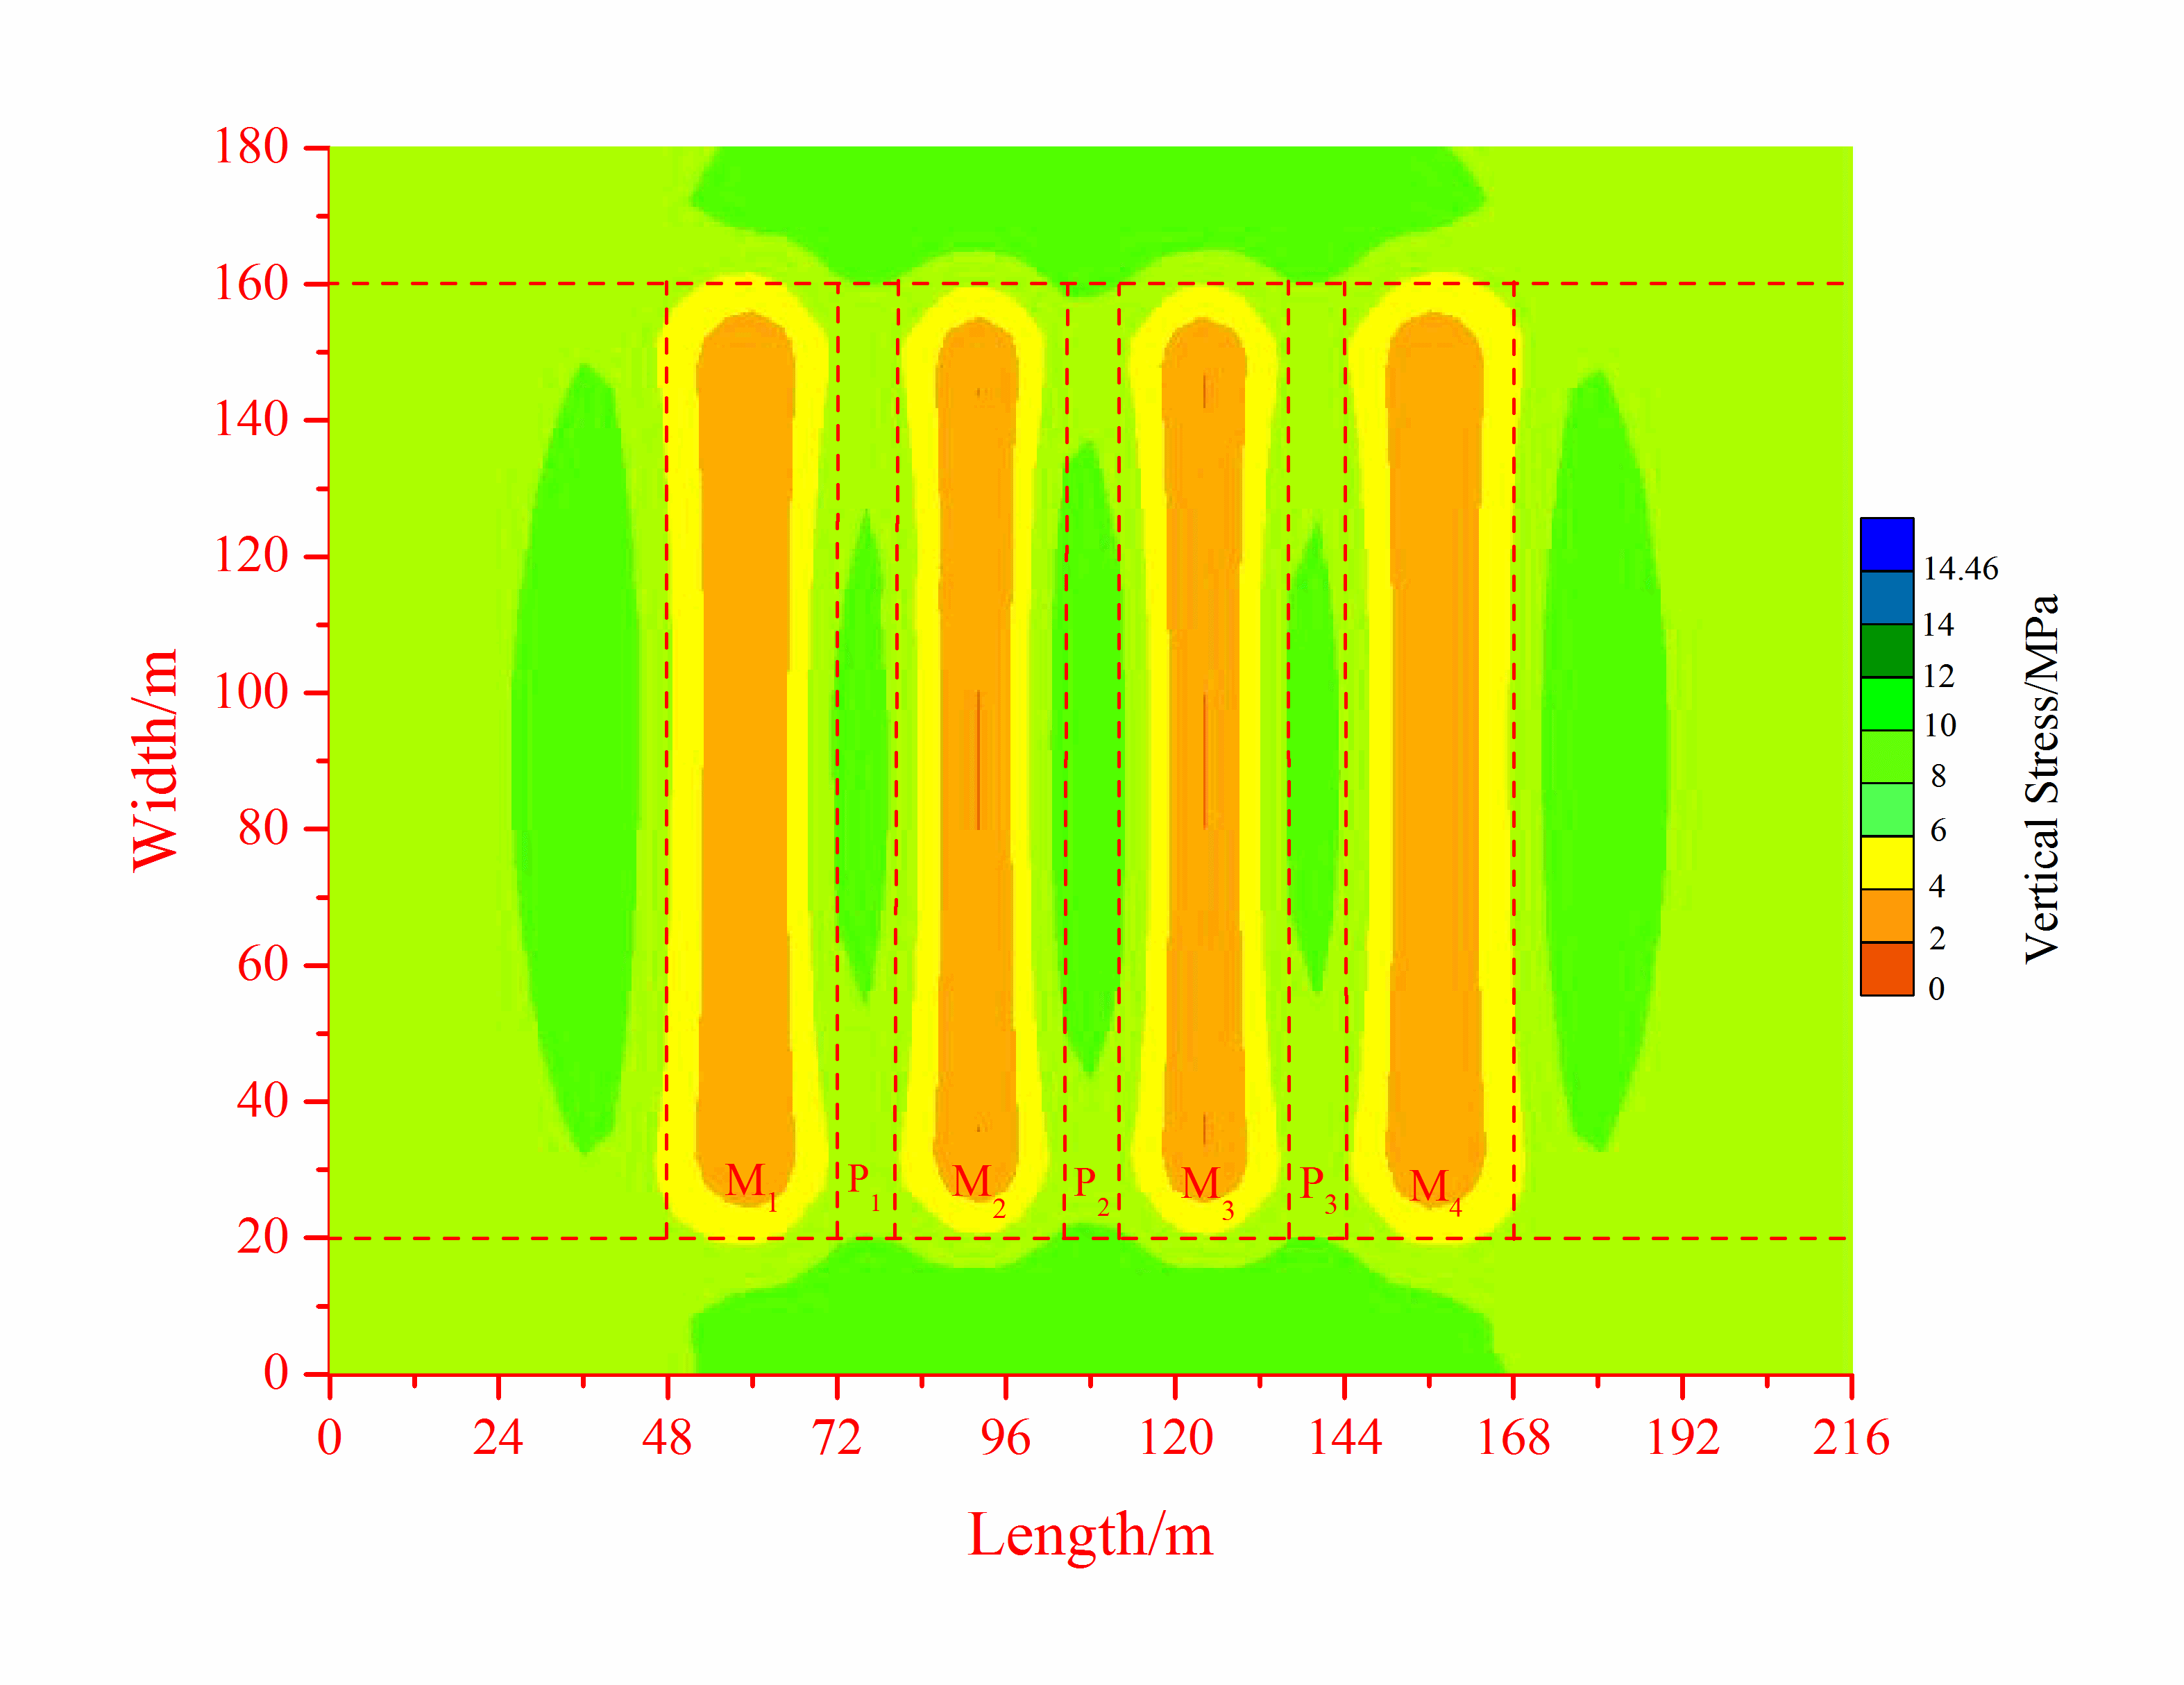**  (**d**) |

**Figure 7. Vertical stress distribution Contour after pillar excavation of coal seam No. 8.(a) after pillar excavation of M1, (b) after pillar excavation of M2, (c) after pillar excavation of M3 and (d) after pillar excavation of M4.**

| 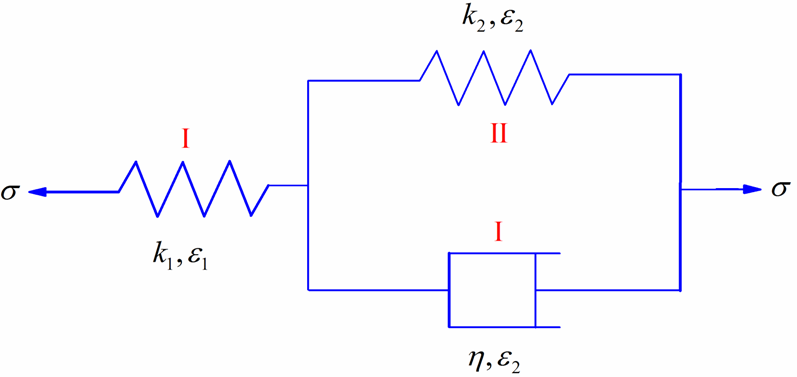 |
| --- |

**Figure 8. Mechanical model of a residual coal pillar.**

| 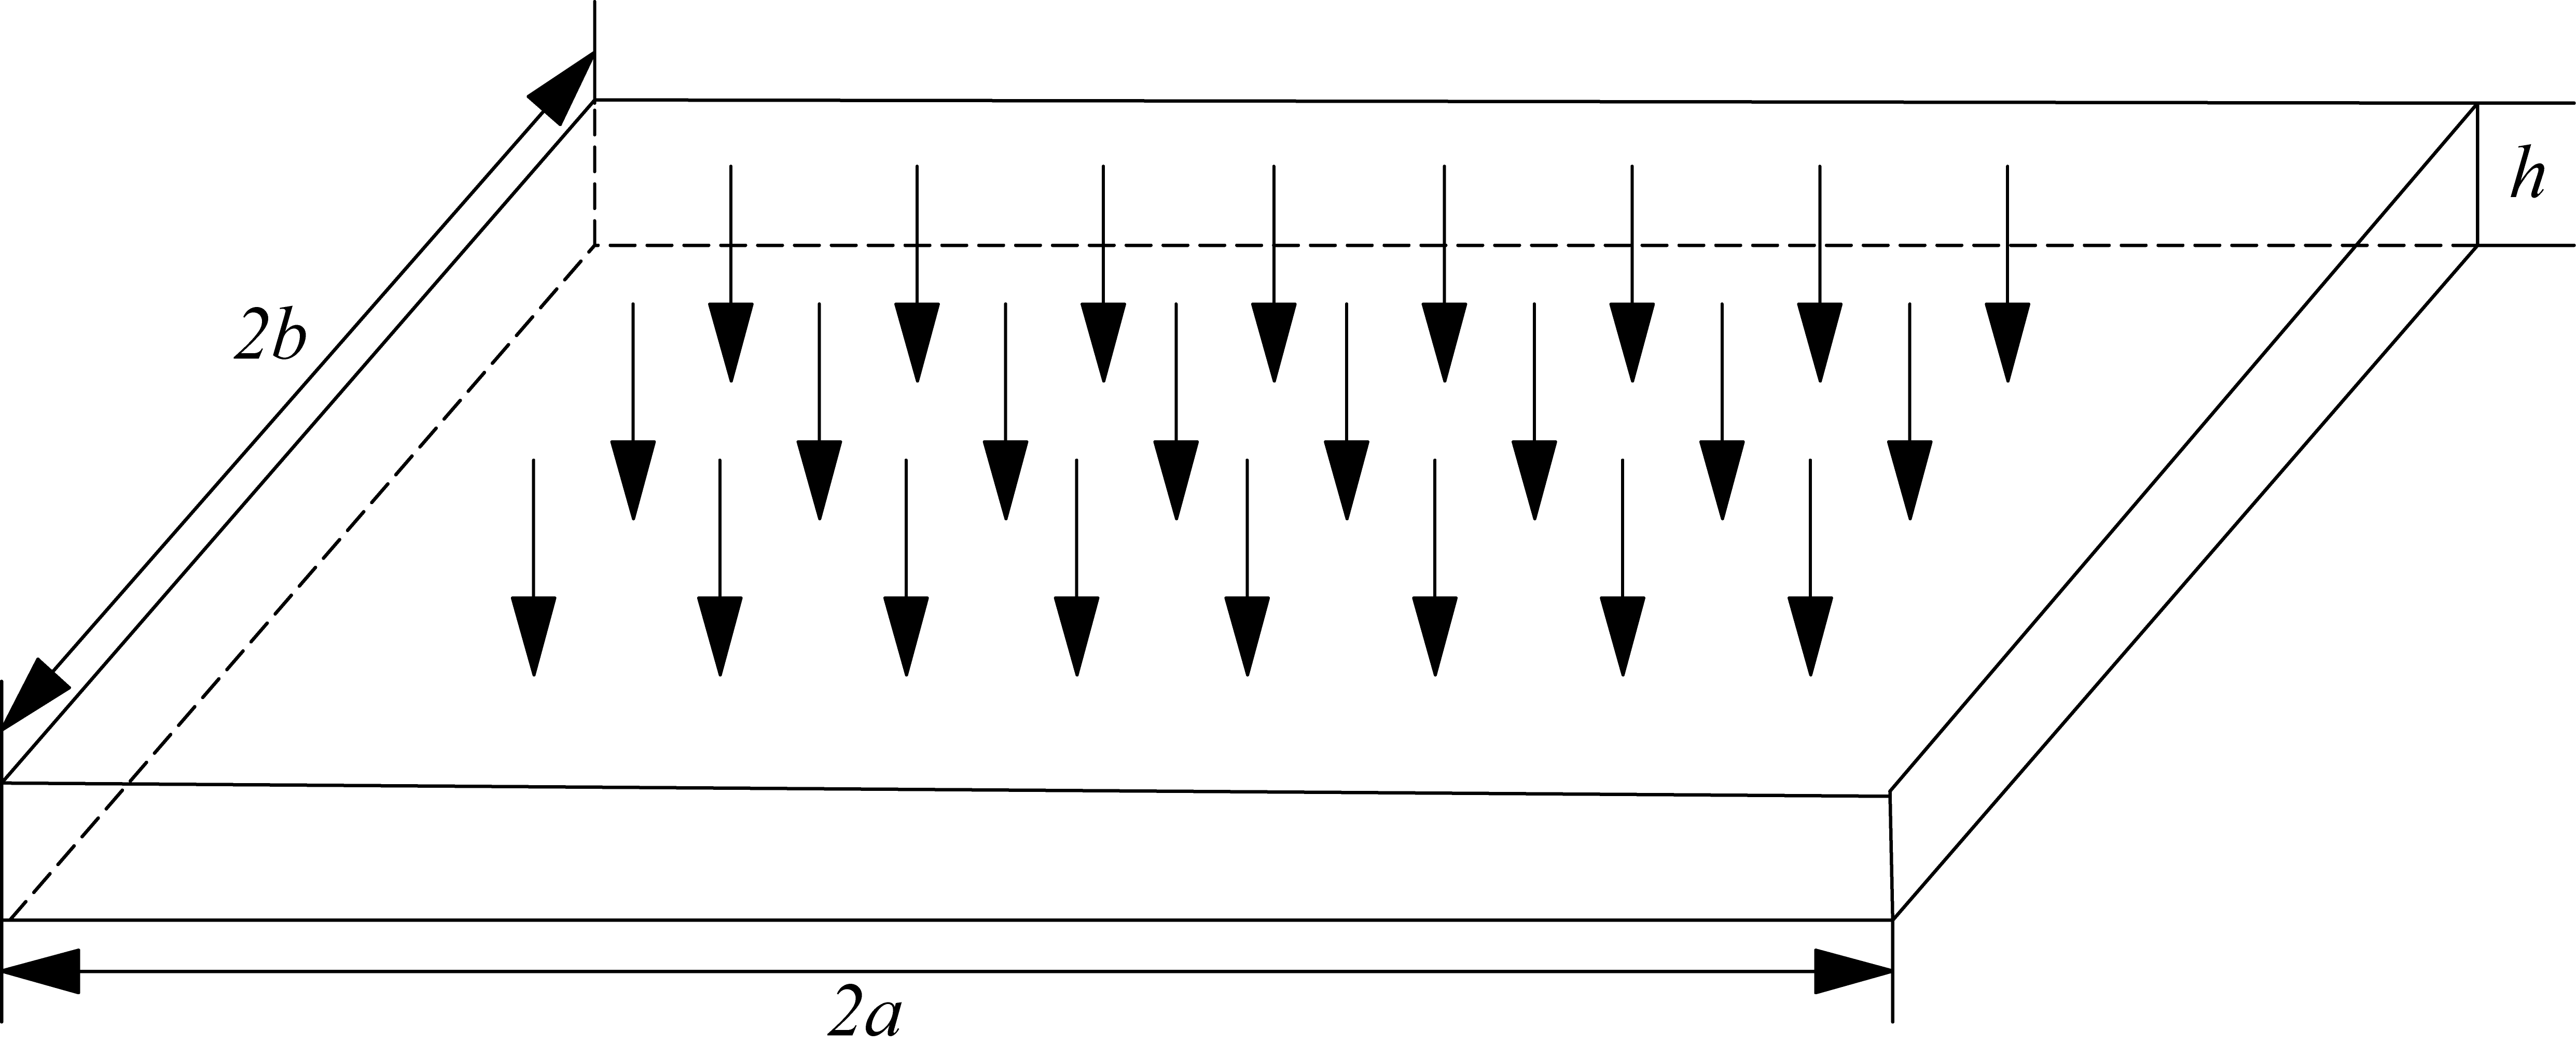  (**a**) | 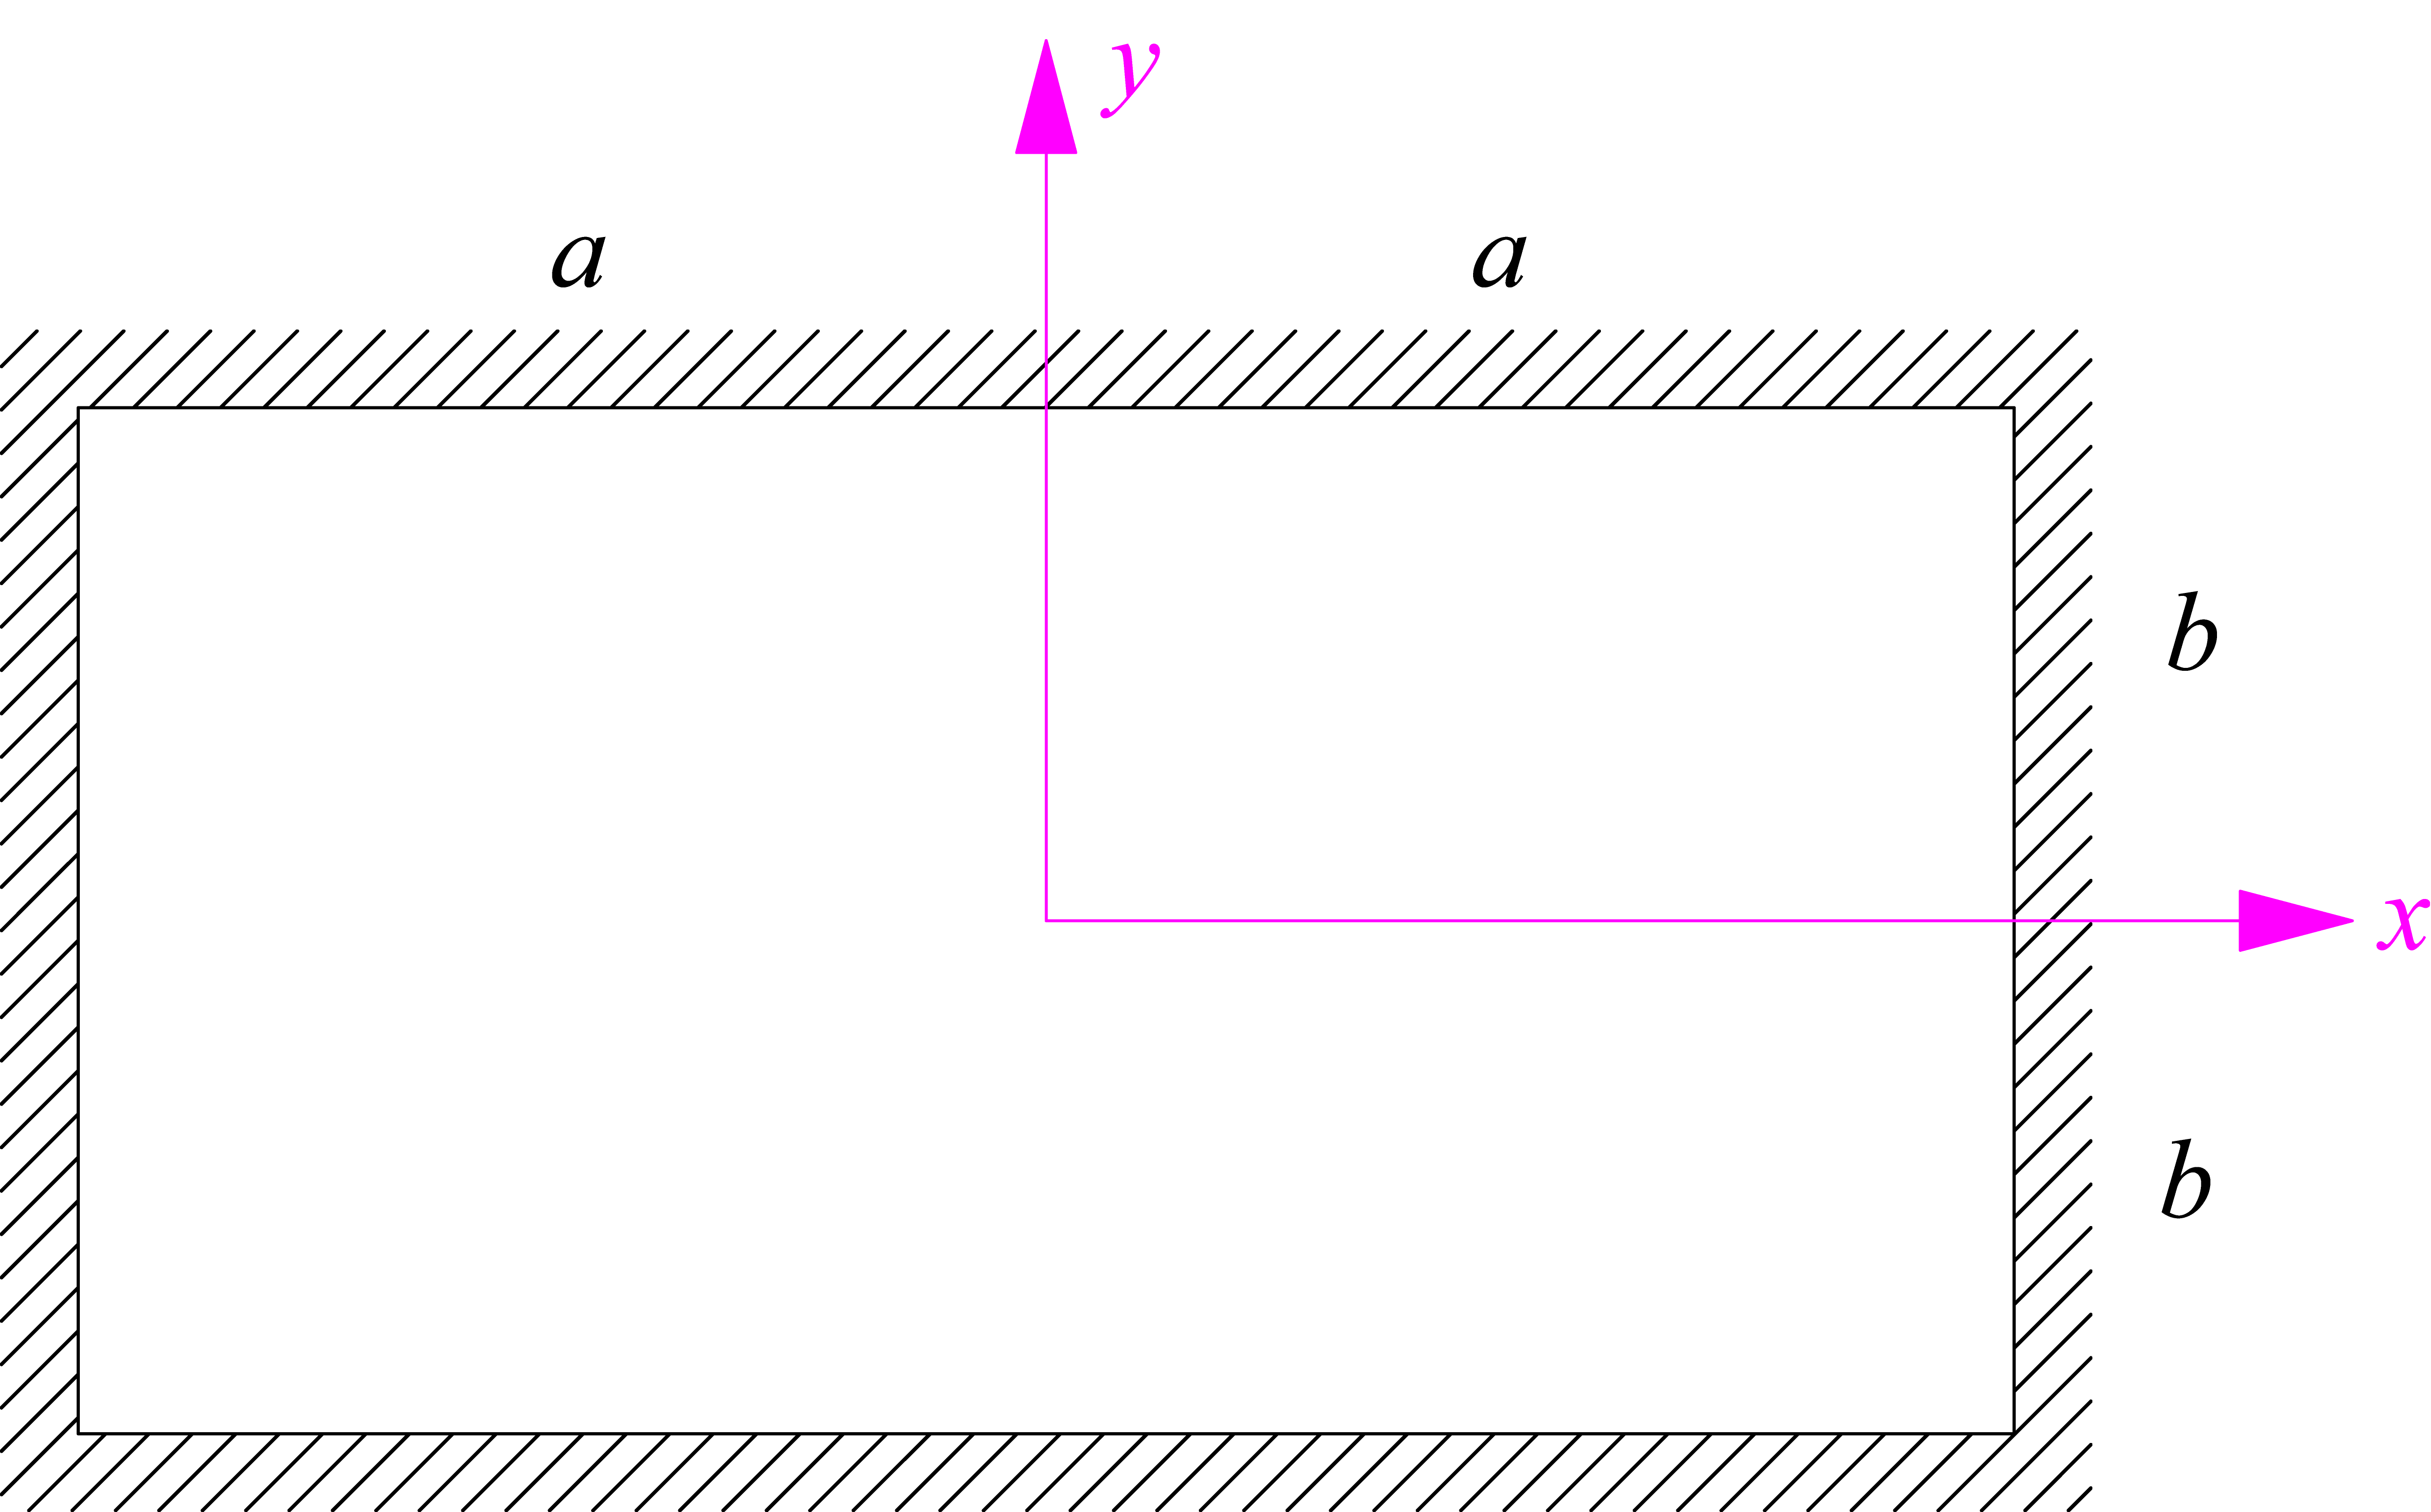  (**b**) |
| --- | --- |

**Figure 9.** Elastic rectangular plate with four fixed sides. **(a)** is the three-dimensional model of interburden; **(b)** is the two-dimensional model of interburden.

| 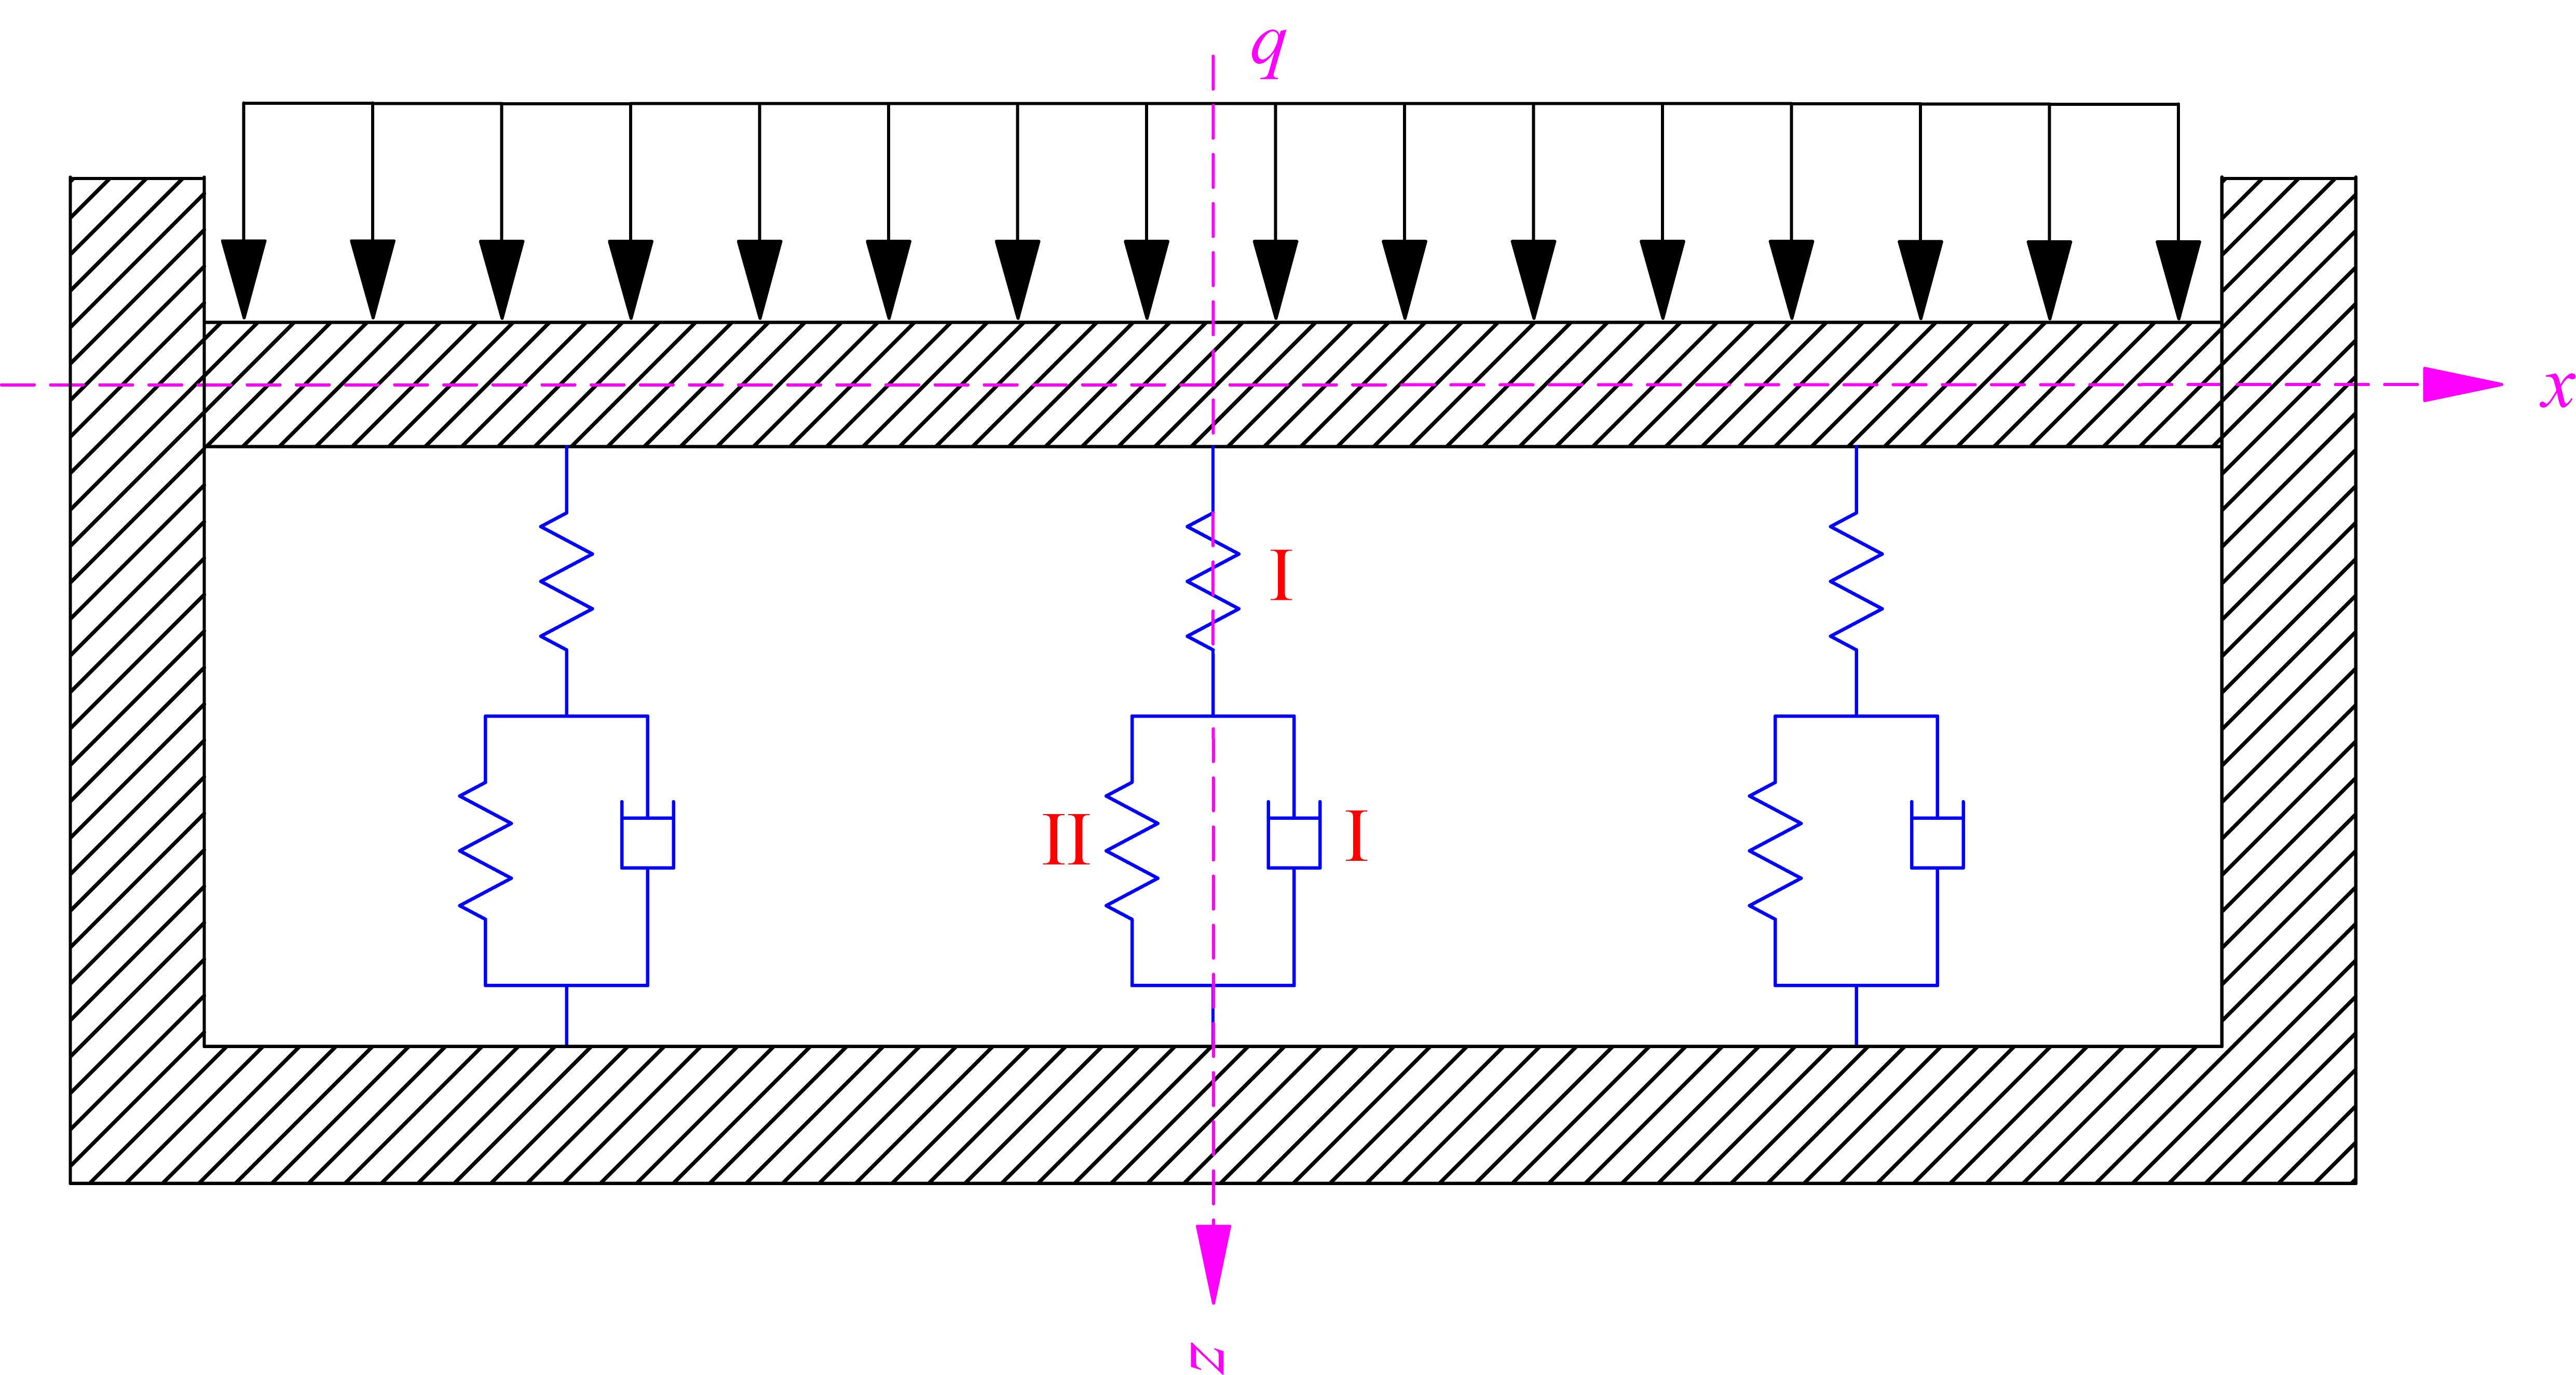 |
| --- |

**Figure 10.** Mechanical model of interburden over abandoned pillar working.

| 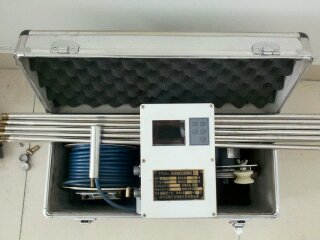 |
| --- |

**Figure 11.** TYGD10 high-definition borehole camera detection

| 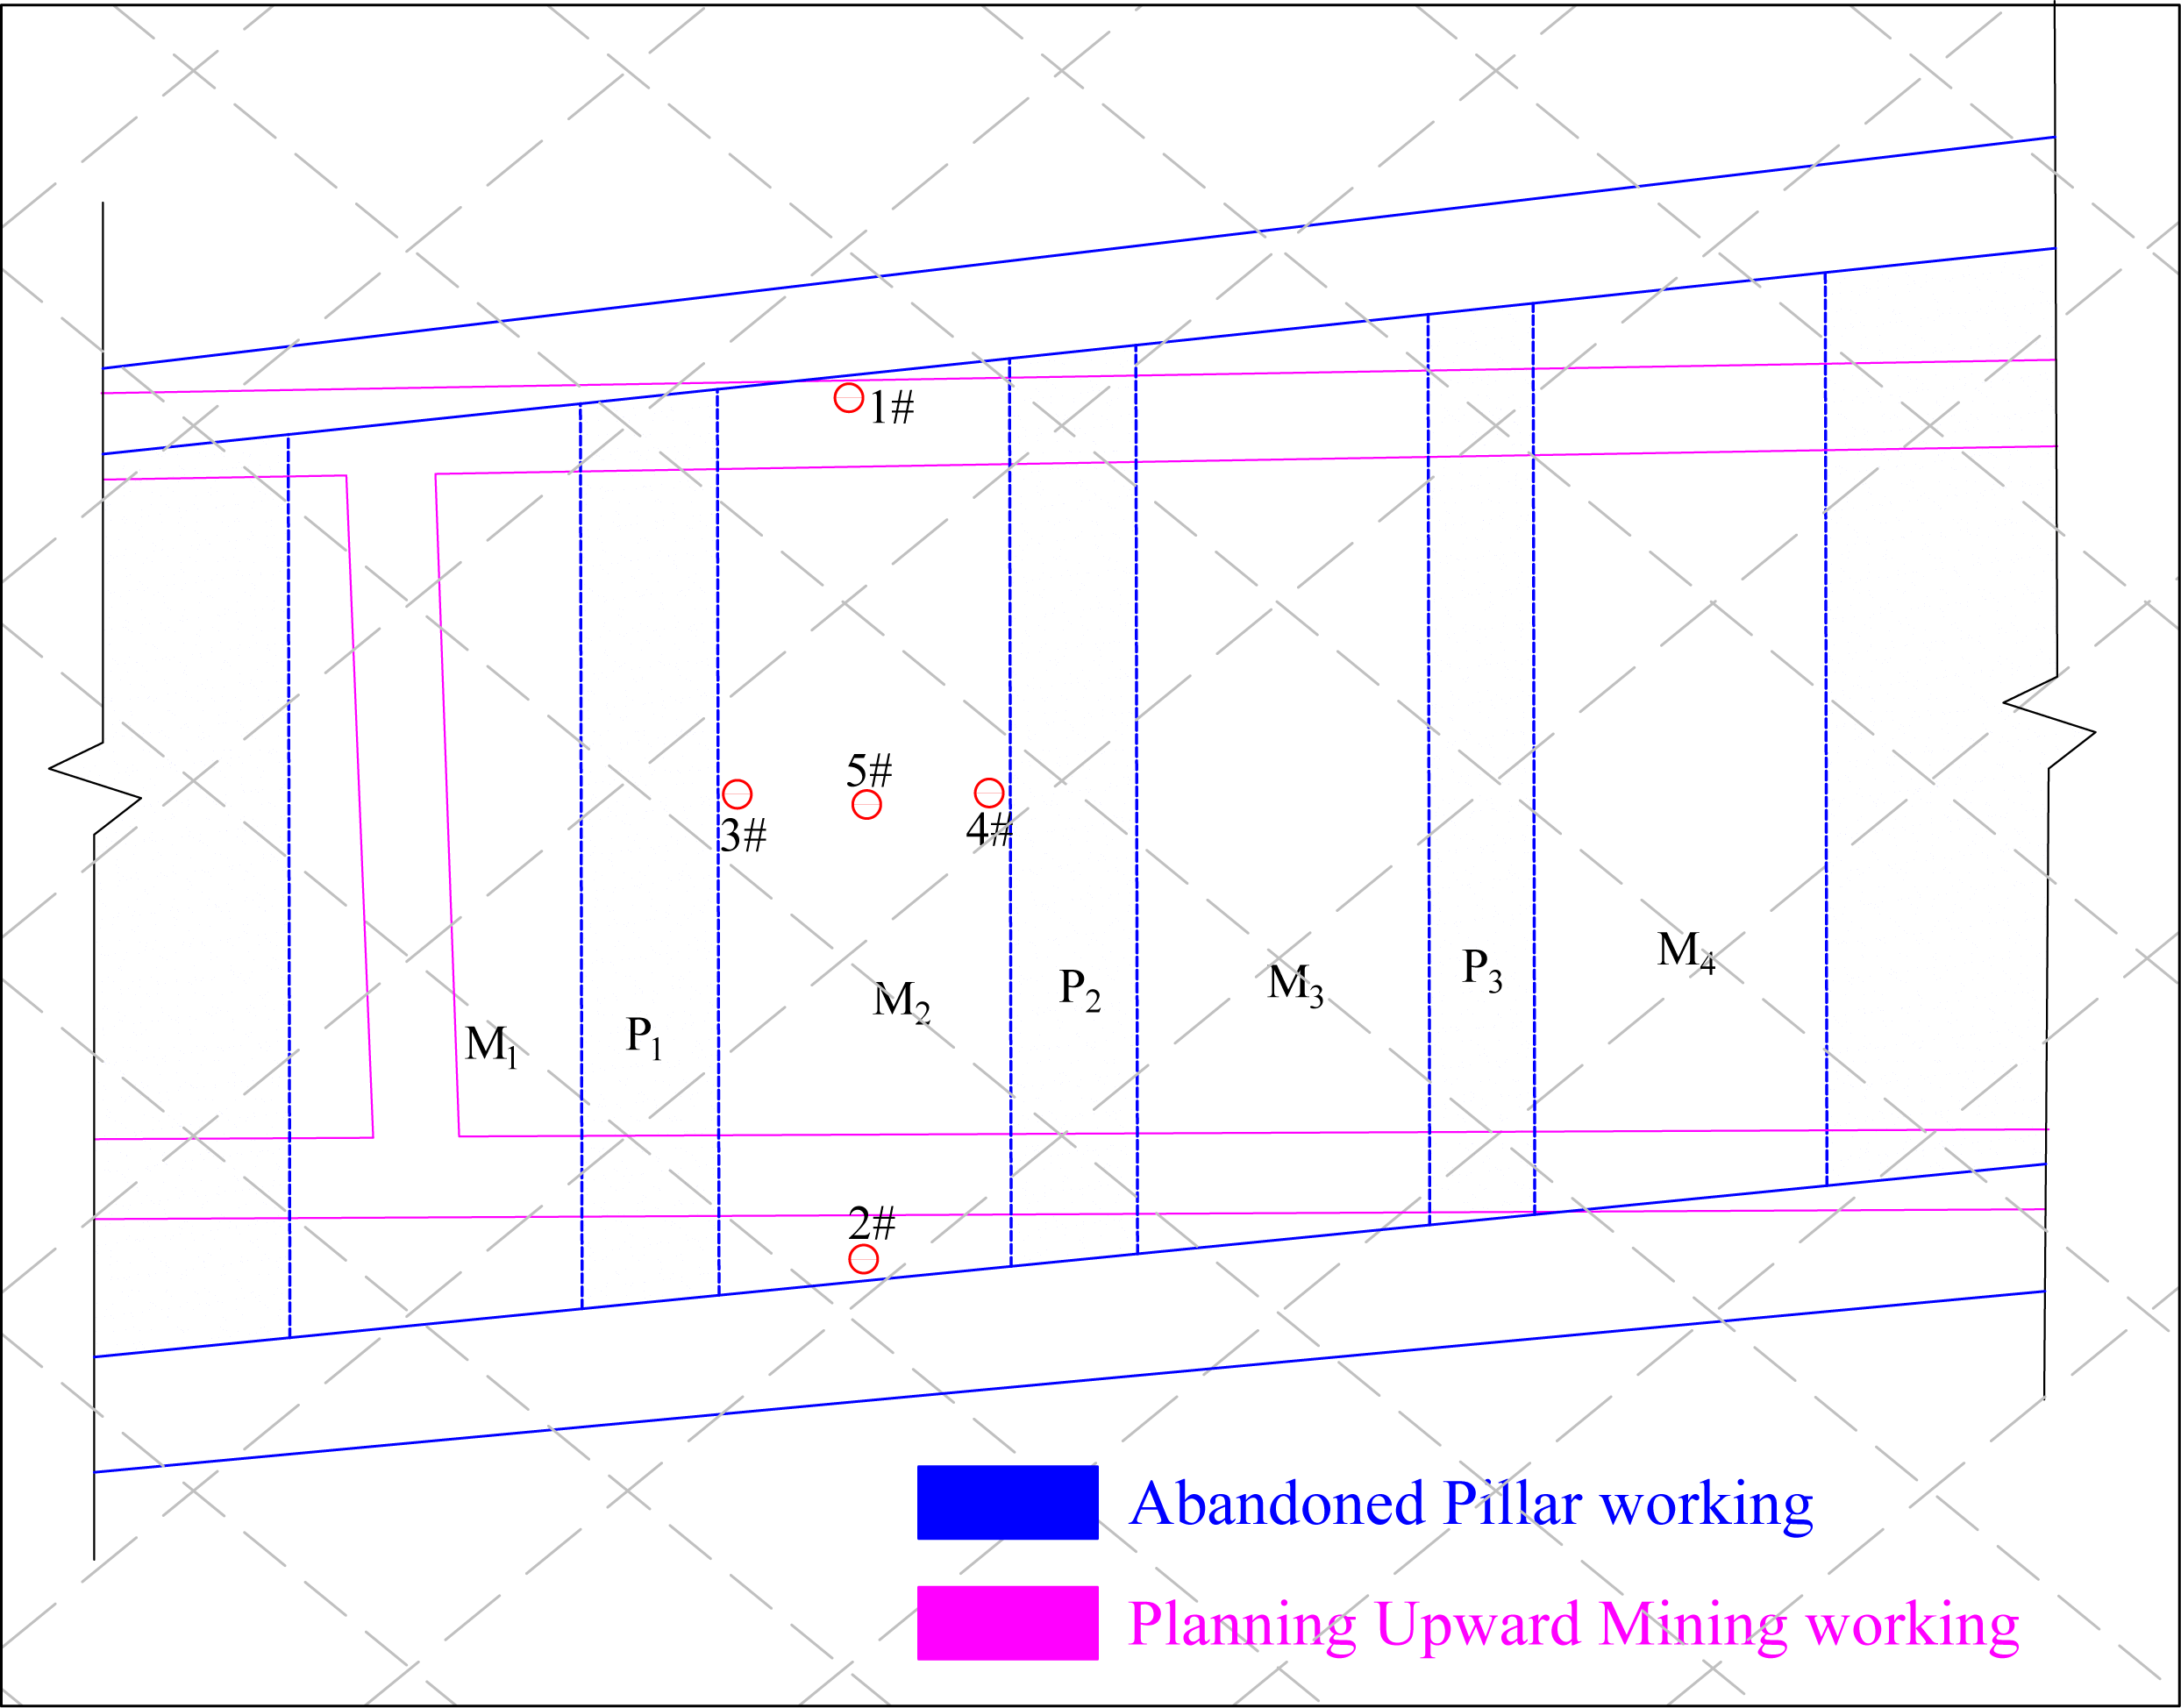 |
| --- |

**Figure 12.** Arrangement of monitoring boreholes

| 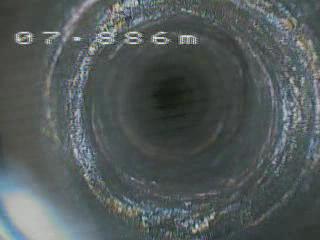 (**a**) | 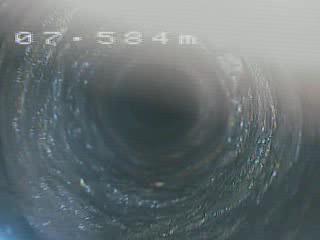  (**b**) |
| --- | --- |
| 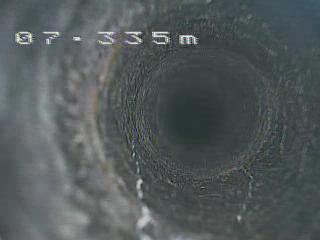  (**c**) | 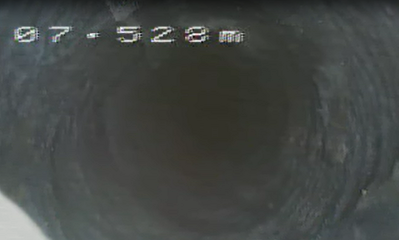  (**d**) |

**Figure 13.** Borehole images at boundary positions.(a) Boreholes 1#, (b) Boreholes 2#, (c) Boreholes 3# and (d) Boreholes 4#.

| 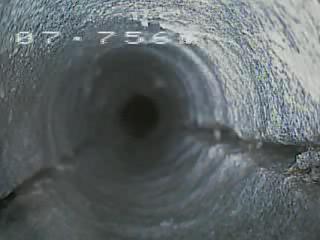 |
| --- |

**Figure 14.** Borehole 5# image at central positio
